# Supplementary material
Source: PubMed Central journal article supplement (PMC5089065)

*Supporting information for*

**Assembly of Peptides Derived from  $\beta$ -Sheet Regions of  $\beta$ -Amyloid**

Nicholas L. Truex, Yilin Wang, and James S. Nowick\*

*Department of Chemistry, University of California, Irvine, Irvine, CA 92697-2025*

\*To whom correspondence should be addressed: jsnowick@uci.edu

**I. SUPPLEMENTAL FIGURES**

|          |                                                                                                                    |    |
|----------|--------------------------------------------------------------------------------------------------------------------|----|
| Fig. S1. | <sup>1</sup> H NMR spectra of peptide <b>1a</b> at various concentrations in D <sub>2</sub> O at 600 MHz and 298 K | S3 |
| Fig. S2. | Key NOEs from the $\beta$ -sheet folding and dimerization of peptide <b>1a</b>                                     | S4 |
| Fig. S3. | Key interlayer NOEs from the tetramerization of peptide <b>1a</b>                                                  | S5 |
| Fig. S4. | <sup>1</sup> H NMR spectra of peptide <b>1b</b> at various concentrations in D <sub>2</sub> O at 600 MHz and 298 K | S6 |
| Fig. S5. | Key NOEs from the $\beta$ -sheet folding and dimerization of peptide <b>1b</b>                                     | S7 |
| Fig. S6. | Key interlayer NOEs from the tetramerization of peptide <b>1b</b>                                                  | S8 |
| Fig. S7. | <sup>15</sup> N-Edited NOESY spectrum of peptide [ <sup>15</sup> N] <b>1a</b>                                      | S9 |
| Fig. S8. | <sup>15</sup> N-Edited NOESY spectrum of peptide [ <sup>15</sup> N] <b>1b</b>                                      | S9 |

**II. MATERIALS AND METHODS**

|                                                          |     |
|----------------------------------------------------------|-----|
| General                                                  | S10 |
| Synthesis of Peptides <b>1</b>                           | S11 |
| Fmoc-Protection of <sup>15</sup> N-Labeled Amino Acids   | S14 |
| NMR Spectroscopy of Peptides <b>1</b>                    | S16 |
| NMR Spectroscopy of Peptides [ <sup>15</sup> N] <b>1</b> | S17 |
| Molecular Modeling of Peptides <b>1a</b> and <b>1b</b>   | S19 |

**III. REFERENCES** S20

|                                                                                                                 |     |
|-----------------------------------------------------------------------------------------------------------------|-----|
| <b>IV. CHARACTERIZATION DATA</b>                                                                                | S20 |
| <b>Peptide 1a</b>                                                                                               |     |
| HPLC trace                                                                                                      | S21 |
| mass spectrum                                                                                                   | S21 |
| 1D <sup>1</sup> H NMR spectrum at 0.15 mM in D <sub>2</sub> O at 600 MHz and 293 K                              | S24 |
| 2D TOCSY spectrum at 0.15 mM in D <sub>2</sub> O at 600 MHz and 293 K                                           | S30 |
| 2D ROESY spectrum at 0.15 mM in D <sub>2</sub> O at 600 MHz and 293 K                                           | S32 |
| 2D DOSY spectrum at 0.15 mM in D <sub>2</sub> O at 500 MHz and 298 K                                            | S34 |
| 1D <sup>1</sup> H NMR spectrum at 8.0 mM in D <sub>2</sub> O at 600 MHz and 298 K                               | S35 |
| 2D TOCSY spectrum at 8.0 mM in D <sub>2</sub> O at 600 MHz and 298 K                                            | S41 |
| 2D NOESY spectrum at 8.0 mM in D <sub>2</sub> O at 600 MHz and 298 K                                            | S44 |
| 2D EXSY spectrum at 8.0 mM in D <sub>2</sub> O at 600 MHz and 318 K                                             | S48 |
| 2D DOSY spectrum at 8.0 mM in D <sub>2</sub> O at 500 MHz and 298 K                                             | S51 |
| <b>Peptide 1b</b>                                                                                               |     |
| HPLC trace                                                                                                      | S52 |
| mass spectrum                                                                                                   | S52 |
| 1D <sup>1</sup> H NMR spectrum at 1.0 mM in D <sub>2</sub> O at 600 MHz and 293 K                               | S55 |
| 2D TOCSY spectrum at 1.0 mM in D <sub>2</sub> O at 600 MHz and 293 K                                            | S60 |
| 2D ROESY spectrum at 1.0 mM in D <sub>2</sub> O at 600 MHz and 293 K                                            | S62 |
| 2D DOSY spectrum at 1.0 mM in D <sub>2</sub> O at 500 MHz and 298 K                                             | S64 |
| 1D <sup>1</sup> H NMR spectrum at 16.0 mM in D <sub>2</sub> O at 600 MHz and 293 K                              | S65 |
| 2D TOCSY spectrum at 16.0 mM in D <sub>2</sub> O at 600 MHz and 293 K                                           | S70 |
| 2D NOESY spectrum at 16.0 mM in D <sub>2</sub> O at 600 MHz and 293 K                                           | S73 |
| 2D DOSY spectrum at 16.0 mM in D <sub>2</sub> O at 500 MHz and 298 K                                            | S76 |
| <b>Fmoc-[<sup>15</sup>N]Phe-OH</b>                                                                              |     |
| 1D <sup>1</sup> H NMR spectrum in CDCl <sub>3</sub> at 500 MHz and 298 K                                        | S77 |
| 1D <sup>13</sup> C NMR spectrum in CDCl <sub>3</sub> at 500 MHz and 298 K                                       | S78 |
| <b>Fmoc-[<sup>15</sup>N]Gly-OH</b>                                                                              |     |
| 1D <sup>1</sup> H NMR spectrum in CDCl <sub>3</sub> at 500 MHz and 298 K                                        | S79 |
| 1D <sup>13</sup> C NMR spectrum in CDCl <sub>3</sub> at 500 MHz and 298 K                                       | S80 |
| <b>Peptide [<sup>15</sup>N]1a</b>                                                                               |     |
| 2D <sup>1</sup> H, <sup>15</sup> N HSQC at 8.0 mM in 9:1 H <sub>2</sub> O/D <sub>2</sub> O at 600 MHz and 293 K | S81 |
| <b>Peptide [<sup>15</sup>N]1b</b>                                                                               |     |
| 2D <sup>1</sup> H, <sup>15</sup> N HSQC at 8.0 mM in 9:1 H <sub>2</sub> O/D <sub>2</sub> O at 600 MHz and 293 K | S82 |

## I. SUPPLEMENTAL FIGURES

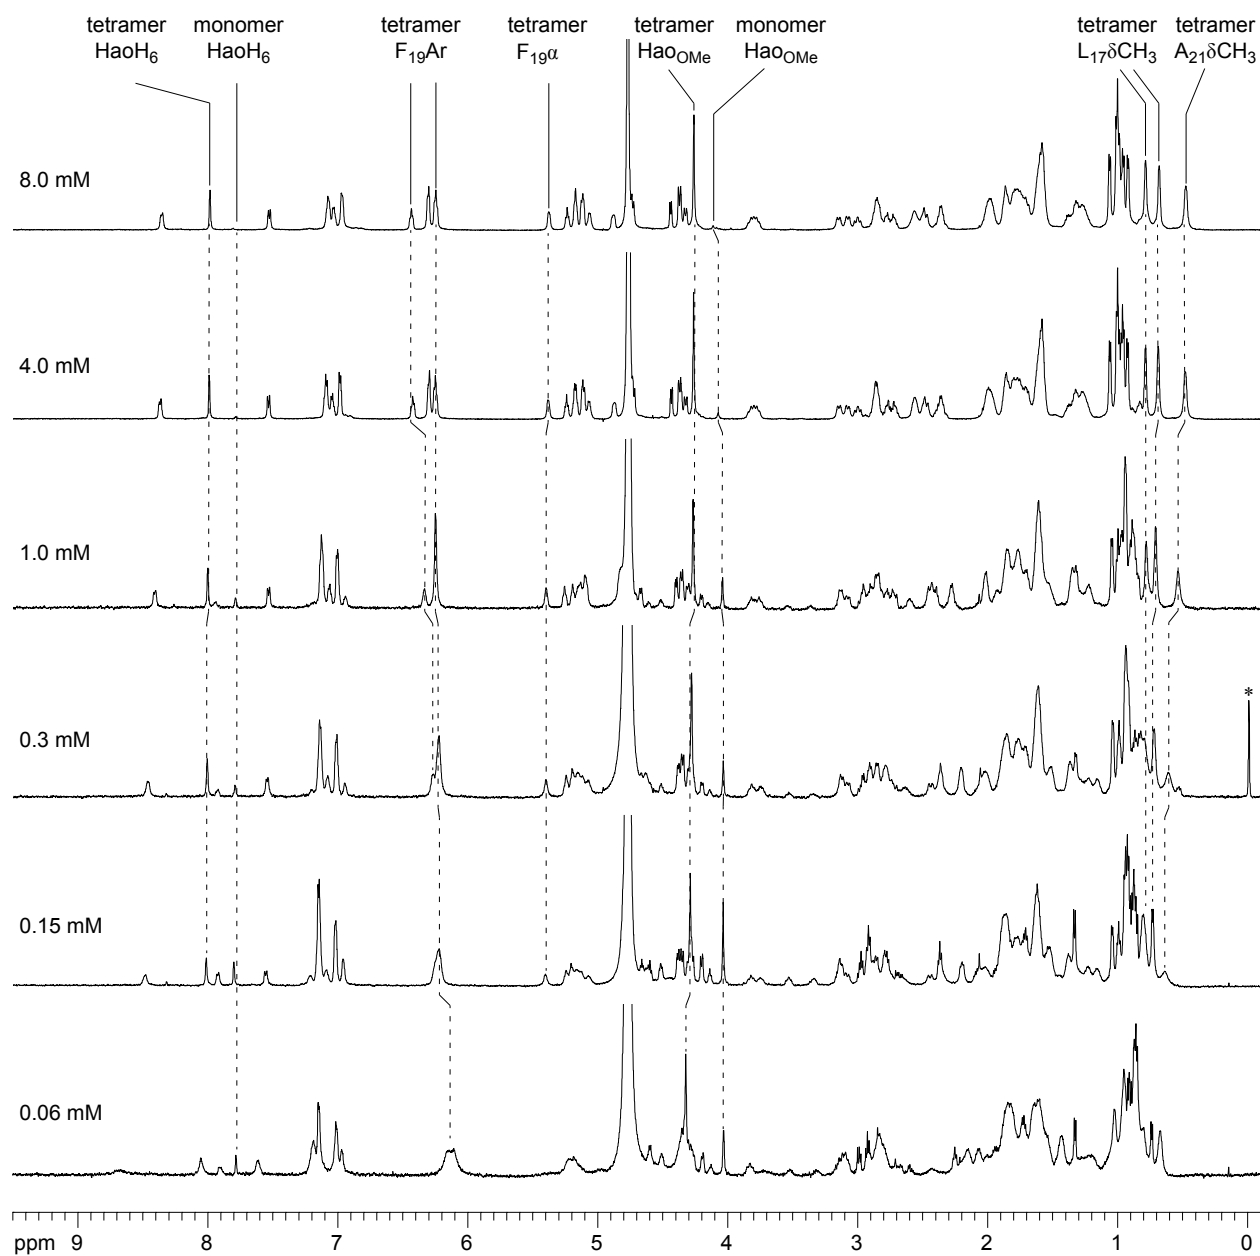

**Figure S1.**  $^1\text{H}$  NMR spectra of peptide **1a** at various concentrations in  $\text{D}_2\text{O}$  at 600 MHz and 298 K. The 0.3 mM sample contains DSA as an internal standard, which is marked by an asterisk (\*).

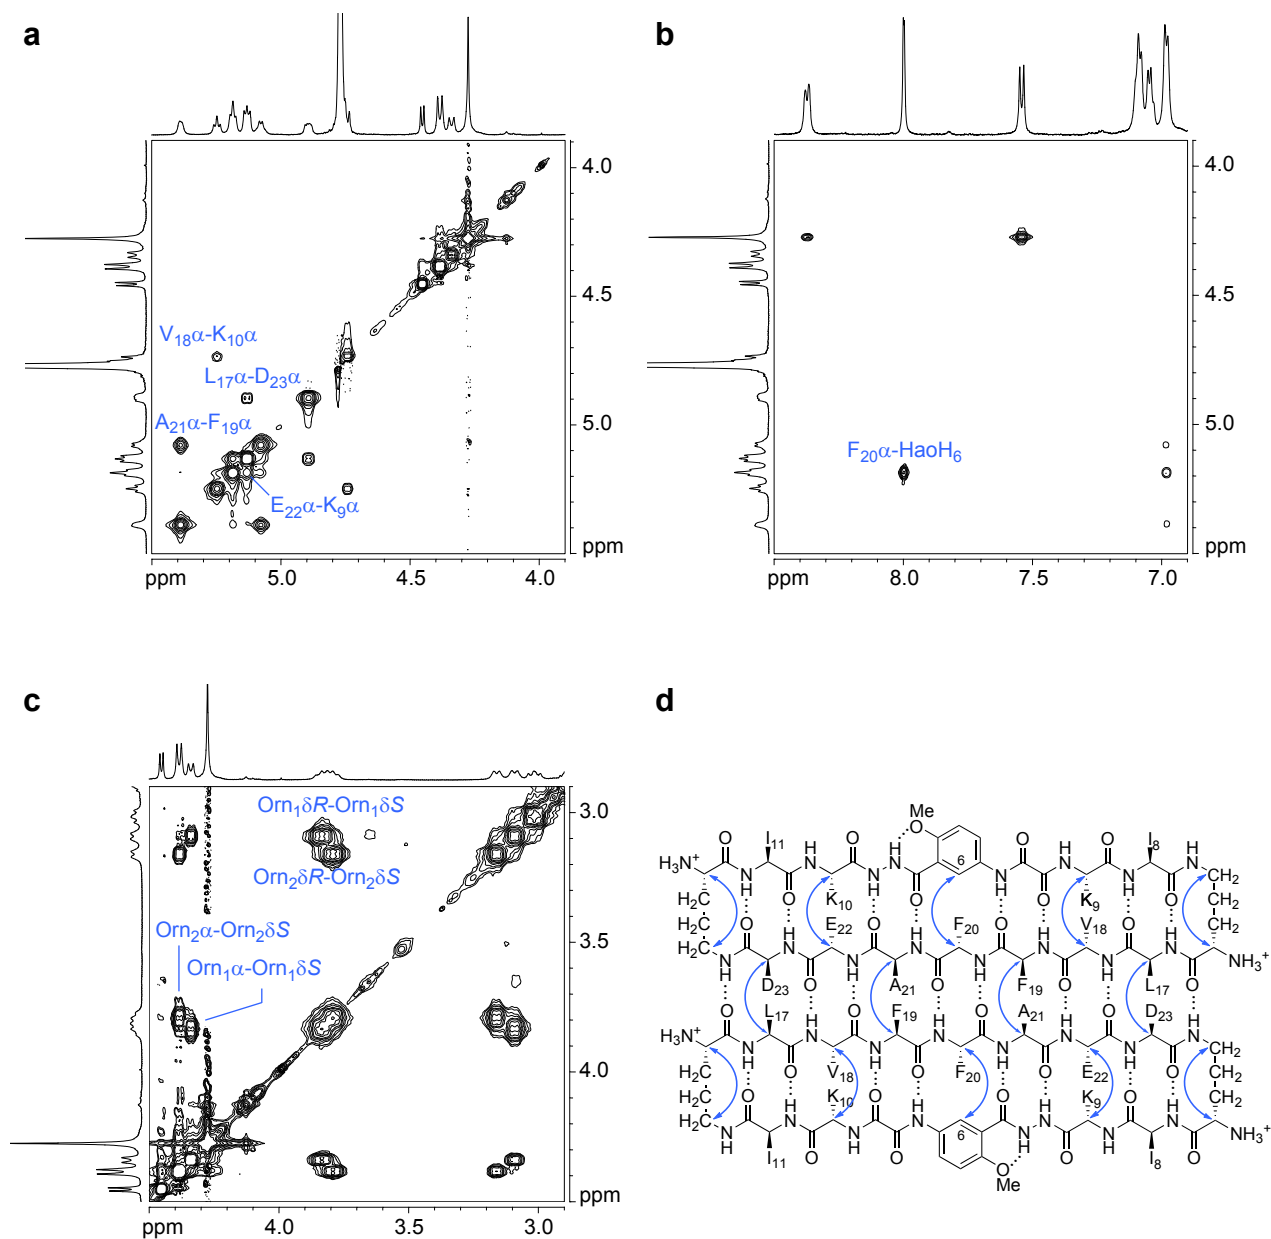

**Figure S2.** Expansions of the NOESY spectrum of peptide **1a** at 8.0 mM in  $D_2O$  at 600 MHz and 298 K. Key NOEs associated with  $\beta$ -sheet folding and dimerization are highlighted in blue. The  $\delta$ Orn *pro-R*  $\delta$ -protons are designated Orn $\delta R$ ; the  $\delta$ Orn *pro-R*  $\delta$ -protons are designated Orn $\delta R$ .

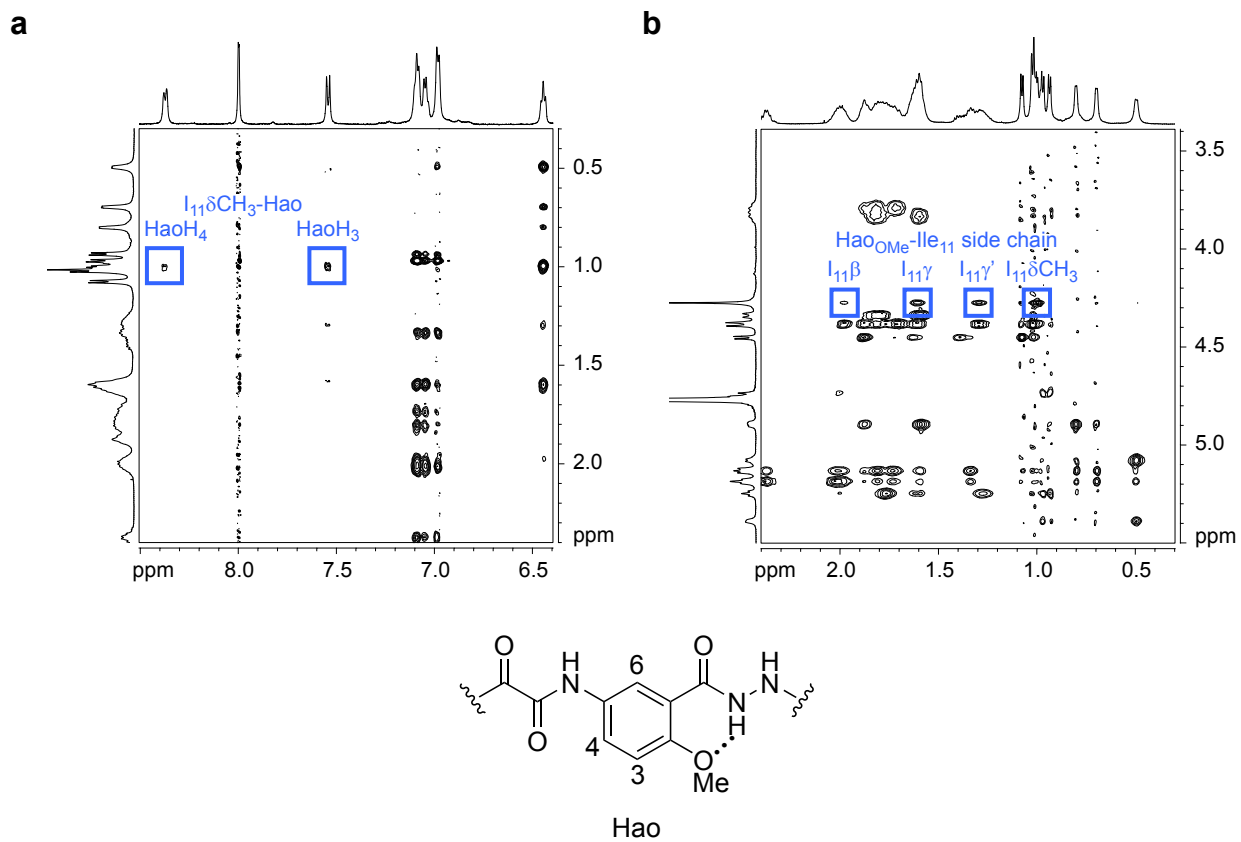

**Figure S3.** Expansions of the NOESY spectrum of peptide **1a** at 8.0 mM in D<sub>2</sub>O at 600 MHz and 298 K. Key interlayer NOEs associated with tetramerization are highlighted in blue.

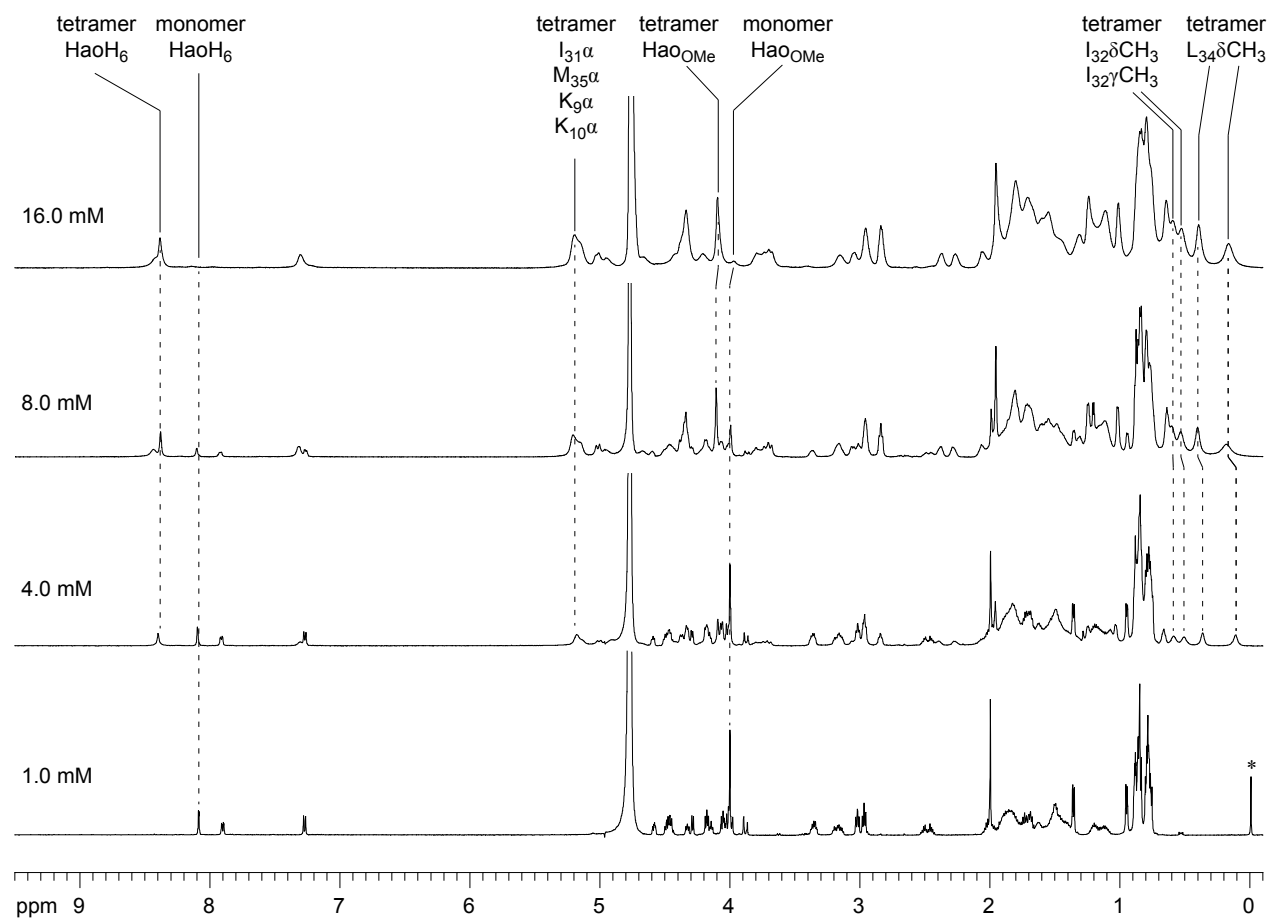

**Figure S4.** <sup>1</sup>H NMR spectra of peptide **1b** at various concentrations in D<sub>2</sub>O at 600 MHz and 298 K. The 1.0 mM sample contains DSA as an internal standard, which is marked by an asterisk (\*).

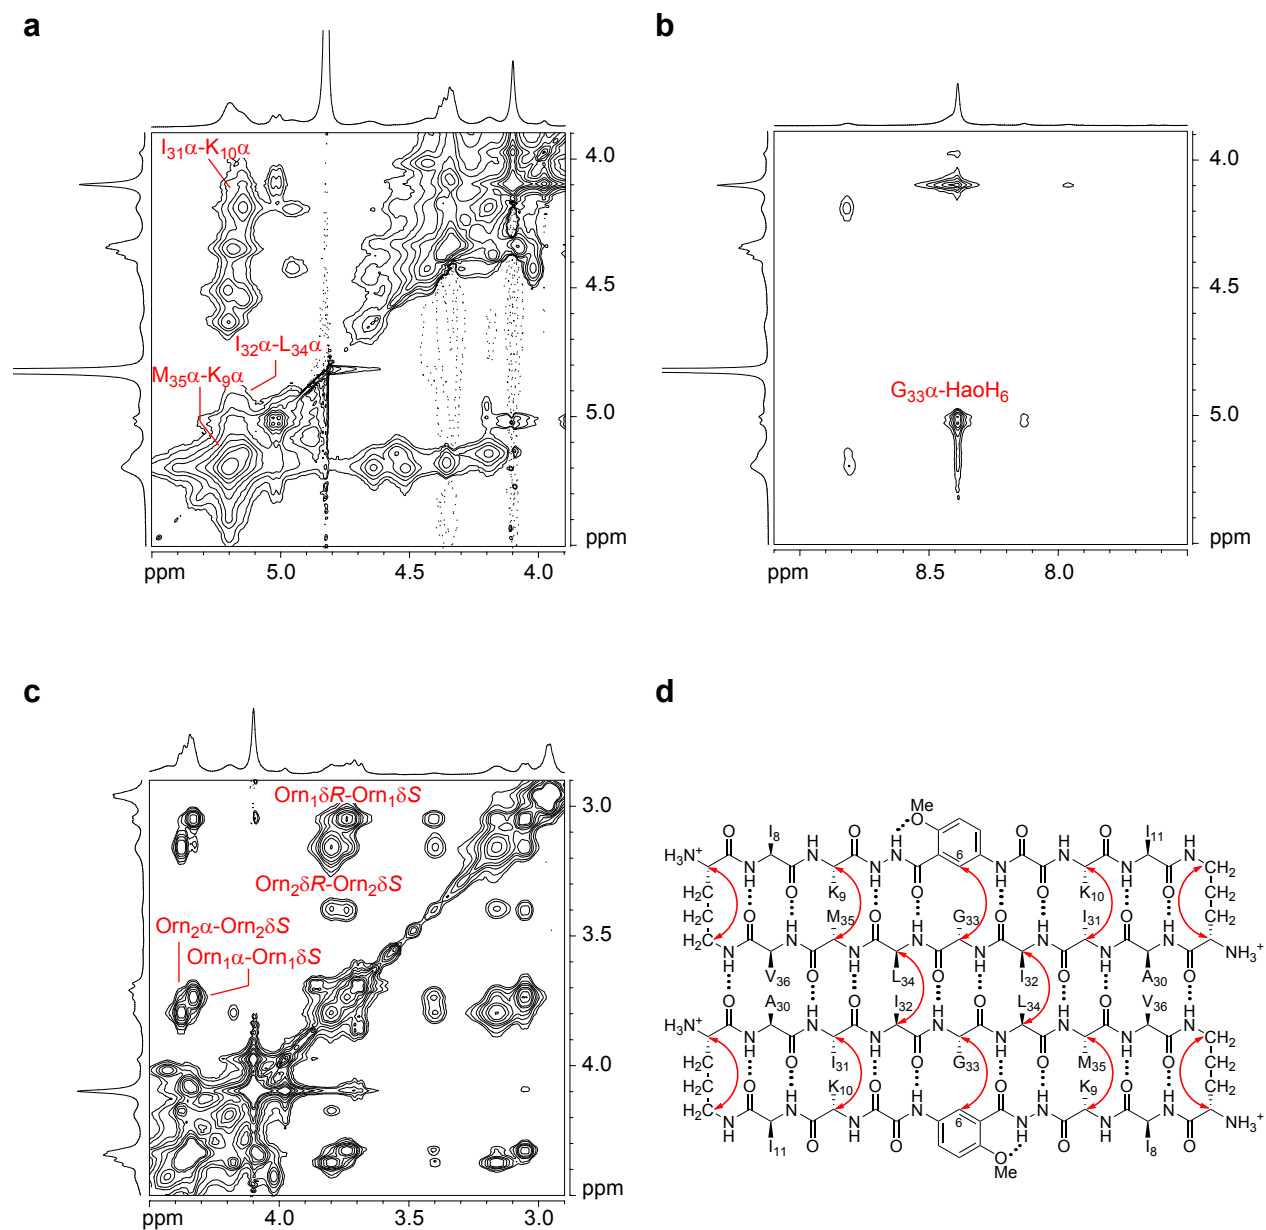

**Figure S5.** Expansions of the NOESY spectrum of peptide **1b** at 16.0 mM in D<sub>2</sub>O at 600 MHz and 293 K. Key NOEs associated with  $\beta$ -sheet folding and dimerization are highlighted in red. The G<sub>33</sub> *pro-R*  $\alpha$ -proton is designated G<sub>33 $\alpha$</sub> ; the  $\delta$ Orn *pro-R*  $\delta$ -protons are designated Orn $\delta$ R; the  $\delta$ Orn *pro-R*  $\delta$ -protons are designated Orn $\delta$ R.

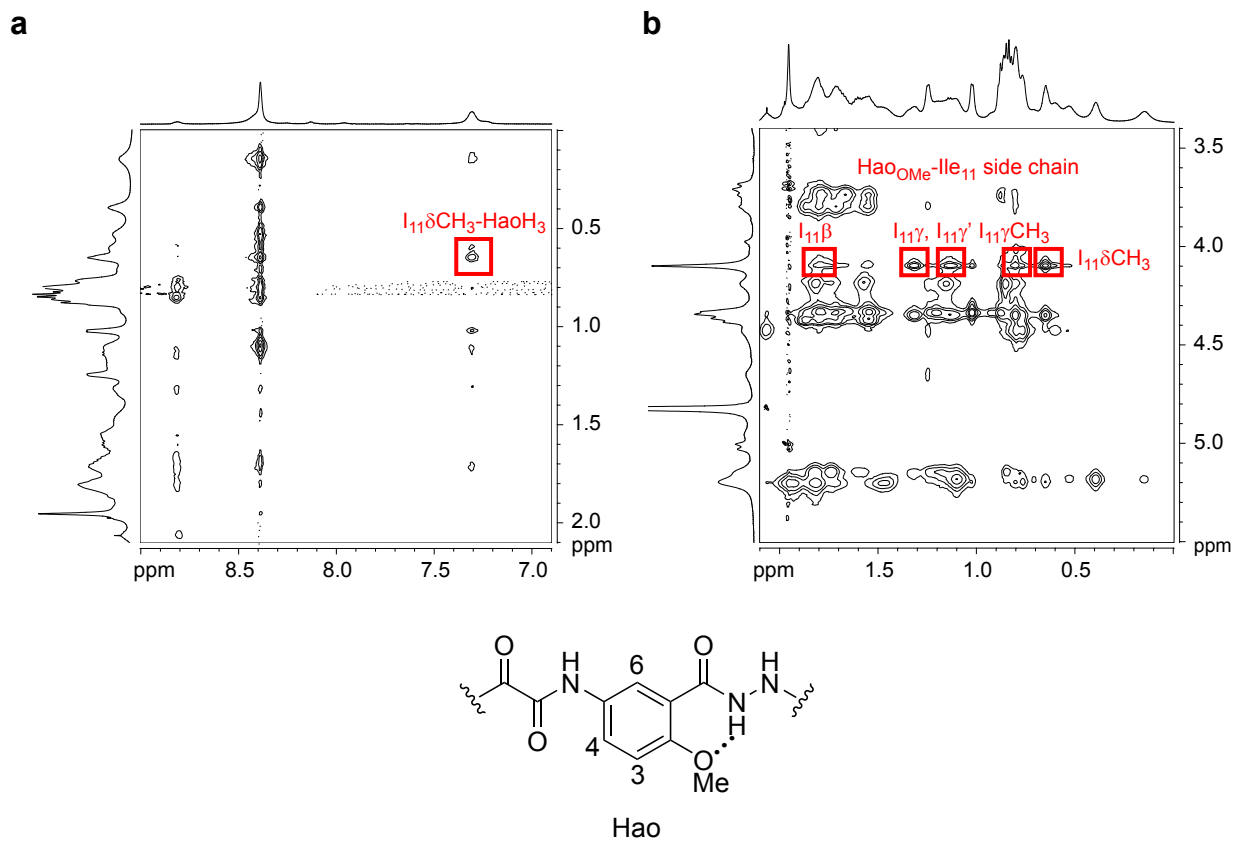

**Figure S6.** Expansions of the NOESY spectrum of peptide **1b** at 8.0 mM in D<sub>2</sub>O at 600 MHz and 293 K. Key interlayer NOEs associated with tetramerization are highlighted in red.



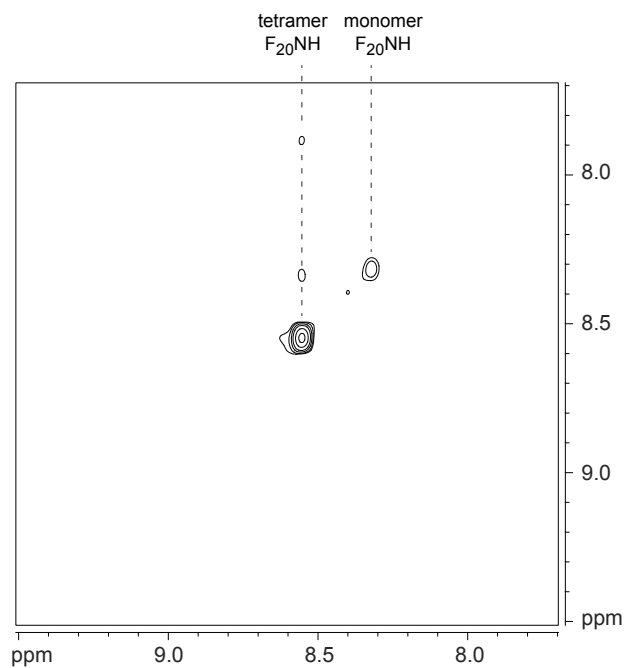

**Figure S7.**  $^{15}\text{N}$ -Edited NOESY spectrum of peptide  $[^{15}\text{N}]\mathbf{1a}$  at 8.0 mM in 9:1  $\text{H}_2\text{O}/\text{D}_2\text{O}$  at 600 MHz and 293 K.

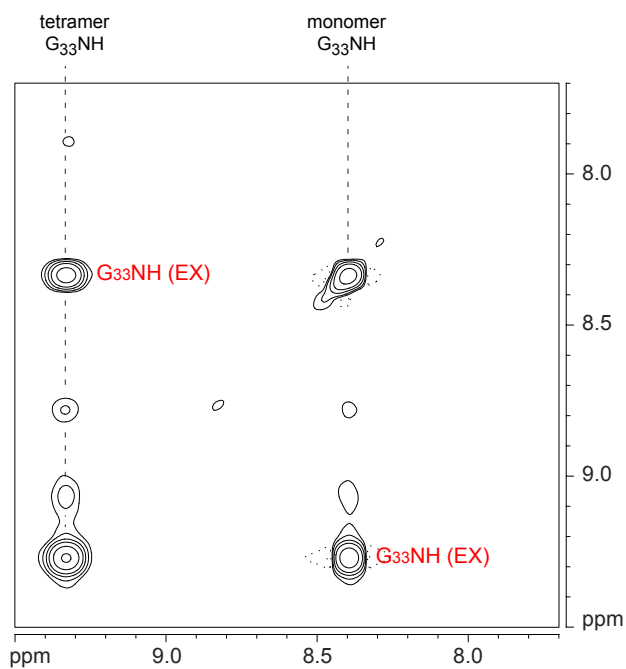

**Figure S8.**  $^{15}\text{N}$ -Edited NOESY spectrum of peptide  $[^{15}\text{N}]\mathbf{1b}$  at 8.0 mM in 9:1  $\text{H}_2\text{O}/\text{D}_2\text{O}$  at 600 MHz and 293 K. Crosspeaks associated with chemical exchange between the monomers and tetramers are labeled EX.

## II. MATERIALS AND METHODS

### General

*N,N*-Dimethylformamide (DMF), 2,4,6-collidine, and piperidine were purchased from Alfa Aesar and used without further purification. HPLC grade acetonitrile (CH<sub>3</sub>CN) was purchased from VWR International and used without further purification. Methylene chloride (CH<sub>2</sub>Cl<sub>2</sub>) was purchased from Fisher Scientific, stored under argon, and passed through a column of alumina before use.<sup>1</sup> Boc-Orn(Fmoc)-OH, HCTU, HBTU and HOBT were purchased from GL Biochem Ltd (Shanghai). 2-Chlorotrityl chloride resin and Fmoc protected amino acids were purchased from Chem-Impex International. *N,N*-Diisopropylethylamine (DIPEA), *N*-methylmorpholine (NMM), trifluoroacetic acid (TFA), and triisopropylsilane (TIPS) were purchased from Oakwood Chemical. Isotopically labeled glycine (<sup>15</sup>N, 98%), phenylalanine (<sup>15</sup>N, 98%), and deuterium oxide (D, 99.96%) were purchased from Cambridge Isotope Laboratories, Inc. Fmoc-Hao-OH was synthesized according to previously reported procedures.<sup>2</sup>

## Synthesis of Peptides 1

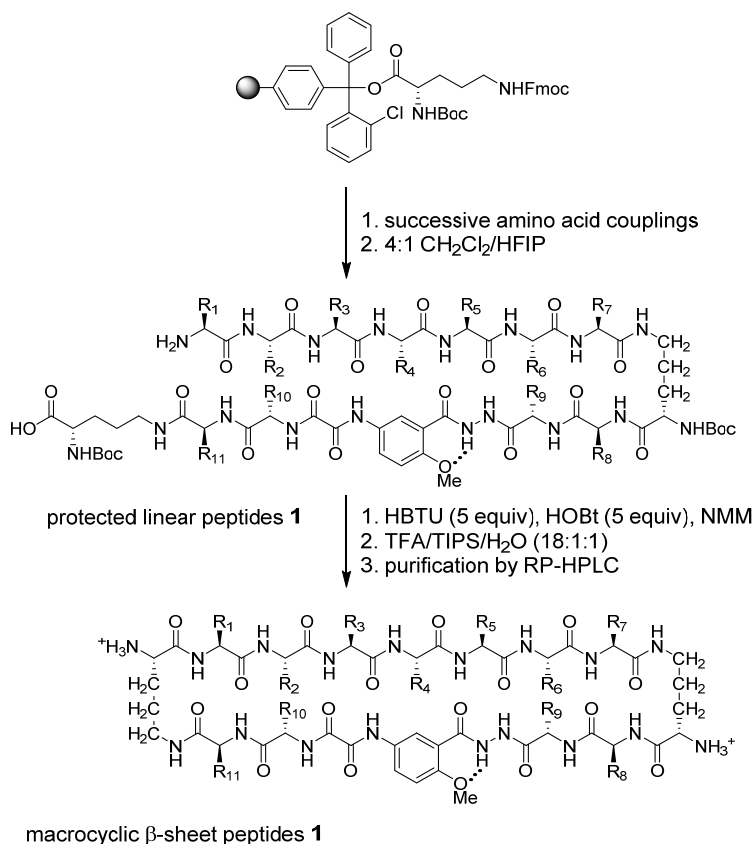

*Resin Loading.* 2-Chlorotrityl chloride resin (300 mg, 1.1 meq/g, 100–200 mesh) was suspended in ca. 8 mL of CH<sub>2</sub>Cl<sub>2</sub> in a 10-mL Bio-Rad Poly-Prep column and allowed to swell (15 min). The CH<sub>2</sub>Cl<sub>2</sub> was drained and a solution of Boc-Orn(Fmoc)-OH (0.22 mmol, 100.0 mg) in CH<sub>2</sub>Cl<sub>2</sub> (7.6 mL) and 2,4,6-collidine (0.4 mL), was added. The suspension was agitated gently overnight (10–12 h) and the solution was drained. The capping solution 17:2:1 CH<sub>2</sub>Cl<sub>2</sub>/MeOH/DIPEA (8 mL) was added. The mixture was agitated gently (1 h), and then the solution was drained.

*Solid-Phase Peptide Synthesis.* The loaded resin was transferred to a solid-phase peptide synthesis vessel with DMF (3 × 2 mL). Successive rounds of solid-phase peptide synthesis were performed on a PS3<sup>TM</sup> Peptide Synthesizer (Protein Technologies) using the following conditions: The Fmoc deprotection steps (2 × 5 min) were performed with a 20% piperidine in DMF solution. The coupling steps (1 × 20 min) were performed for the amino acids (4 equiv) with HCTU (4 equiv) and a 20% 2,4,6-collidine in DMF solution. The unnatural amino acid Fmoc-Hao-OH (2 equiv) was coupled twice with 2 equiv of HCTU per coupling (60 min) to achieve complete coupling. DMF was used to rinse the resin after each deprotection (6 × 3 mL) and after each amino acid coupling (6 × 3 mL).

*Cleavage from Resin.* After the synthesis of each peptide was complete, the resin was transferred into the Poly-Prep column with CH<sub>2</sub>Cl<sub>2</sub> (ca. 2 mL) and the solution was drained. The solid-phase peptide synthesis vessel was rinsed with ca. two additional portions of CH<sub>2</sub>Cl<sub>2</sub> to ensure the complete transfer of the resin and the removal of DMF. A 1:4 HFIP/CH<sub>2</sub>Cl<sub>2</sub> solution (8 mL) was added to the resin and the mixture was agitated gently. After 1 h, the solution was drained into a 250-mL round-bottom flask and the treatment with HFIP/CH<sub>2</sub>Cl<sub>2</sub> solution was repeated. The combined solutions were evaporated under vacuum to give the protected linear peptides **1**.

*Cyclization.* The protected linear peptides **1** were cyclized with HBTU (5 equiv), HOBt (5 equiv), and NMM (8 equiv) in a solution of DMF (125 mL). The solution was stirred under N<sub>2</sub> overnight (12–24 h), and then the DMF was evaporated under vacuum. The peptides were placed under vacuum (ca. 0.1 mmHg) overnight to ensure complete removal of any residual DMF.

*Deprotection.* The protected cyclic peptides **1** were deprotected under acidic conditions with a solution of 18:1:1 TFA/triisopropylsilane/H<sub>2</sub>O (10 mL). The solution was stirred for 2 h, then evaporated under vacuum. For peptides containing a methionine (**1b** and [<sup>15</sup>N]**1b**), 50 mg of dithiothreitol (DTT) was added to the solution to prevent sulfur oxidation.

*RP-HPLC Purification.* The peptides were suspended in a solution of 20% aqueous CH<sub>3</sub>CN (ca. 8 mL) and the suspensions were filtered through a 0.2 μm filter. The purity of each peptide was analyzed by analytical RP-HPLC on a Phenomenex Aeris 2.6μ XB-C18 column (150 mm x 4.6 mm) with a 5–100% gradient over 20 min of CH<sub>3</sub>CN in H<sub>2</sub>O with 0.1% TFA at 1.0 mL/min. The purification of each peptides was performed by preparative RP-HPLC on an Agilent Zorbax 7 μM SB-C18 Prep HT column (21.2 mm x 250 mm) with a 15–30% gradient over 10 min and 30–60% gradient over 45 min of CH<sub>3</sub>CN in H<sub>2</sub>O with 0.1% TFA at 15.0 mL/min. The pure fractions were combined and concentrated under vacuum. The peptides were re-suspended in a solution of H<sub>2</sub>O with 0.1% TFA (ca. 10–15 mL), then lyophilized to give peptides **1** as a white powder in 8–22% yield (30–80 mg) based on the resin loading of the first amino acid Boc-Orn(Fmoc)-OH).

### Fmoc-Protection of $^{15}\text{N}$ -Labeled Amino Acids<sup>3</sup>

Fmoc- $^{15}\text{N}$ ]Phe-OH: A 100-mL one-neck round-bottom flask equipped with a magnetic stirring bar was charged with  $^{15}\text{N}$ -labeled phenylalanine (1.0 g, 6 mmol) and a solution of 1:1  $\text{CH}_3\text{CN}/\text{H}_2\text{O}$  (50 mL).  $\text{Et}_3\text{N}$  (0.6 g, 6 mmol) and Fmoc-OSu (1.9 g, 5.7 mmol) were added, then the reaction mixture was stirred until the solution turned clear (ca. 15 min). Additional  $\text{Et}_3\text{N}$  was added until the pH was roughly 8.5, then the mixture was stirred for 1 h. The mixture was poured into a solution of 1.0 M HCl (250 mL) in a 400-mL beaker while stirring vigorously. The Fmoc- $^{15}\text{N}$ ]Phe-OH precipitated from the solution and the solid was isolated by filtering the mixture through a sintered glass filter funnel with a medium frit. The funnel was covered with a piece of filter paper and the solid was dried by aspirating air through the funnel. The solid was suspended in ca. 200 mL of EtOAc to form a turbid solution. The solution was stirred vigorously for 10 min, dried over  $\text{MgSO}_4$ , filtered, and then concentrated under vacuum to give a white solid. The isolated solid was ground into a fine powder to give ca. 1.94 g (92%).  $^1\text{H}$  NMR (500 MHz,  $\text{CDCl}_3$ ):  $\delta$  7.77 (d,  $J = 7.5$  Hz, 2H), 7.55 (t,  $J = 6.2$  Hz, 2H), 7.40 (t,  $J = 7.4$  Hz, 2H), 6.80 (m, 5H), 7.15 (d,  $J = 6.6$  Hz, 2H), 5.19 (dd,  $J = 91.9, 8.2$  Hz, 1H), 4.70 (m, 1H), 4.46 (dd,  $J = 10.4, 7.3$  Hz, 1H), 4.37 (t,  $J = 8.7$  Hz, 1H), 4.21 (t,  $J = 6.7$  Hz, 1H), 3.18 (m, 2H);  $^{13}\text{C}$  NMR (125 MHz,  $\text{CDCl}_3$ )  $\delta$  175.2, 156.0 (d,  $^1J_{\text{CN}} = 25$  Hz), 144.0, 141.6, 135.6, 129.6, 129.0, 128.0, 127.6, 127.3, 125.3, 120.3, 67.3, 54.7 (d,  $^1J_{\text{CN}} = 13.8$  Hz), 47.4, 37.9, 30.0.

Fmoc-[<sup>15</sup>N]Gly-OH: A 100-mL one-neck round-bottom flask equipped with a magnetic stirring bar was charged with <sup>15</sup>N-labeled glycine (1.0 g, 13 mmol) and a solution of 1:1 CH<sub>3</sub>CN/H<sub>2</sub>O (50 mL). Et<sub>3</sub>N (1.3 g, 13 mmol) and Fmoc-OSu (4.2 g, 12.5 mmol) were added, then the reaction mixture was stirred until the solution turned clear (ca. 15 min). Additional Et<sub>3</sub>N was added until the pH was roughly 8.5, then the mixture was stirred for 1 h. The mixture was poured into a solution of 1.0 M HCl (250 mL) in a 400-mL beaker while stirring vigorously. The Fmoc-[<sup>15</sup>N]Gly-OH precipitated from the solution and the solid was isolated by filtering the mixture through a sintered glass filter funnel with a medium frit. The funnel was covered with a piece of filter paper and the solid was dried by aspirating air through the funnel. The solid was suspended in ca. 200 mL of EtOAc to form a turbid solution. The solution was stirred vigorously for 10 min, dried over MgSO<sub>4</sub>, filtered, and then concentrated under vacuum to give a white solid. The isolated solid was ground into a fine powder to give ca. 3.48 g (92%) isolated yield. <sup>1</sup>H NMR (500 MHz, CDCl<sub>3</sub>): δ 7.77 (d, *J* = 7.5 Hz, 2H), 7.60 (d, *J* = 7.4 Hz, 2H), 7.40 (t, *J* = 7.5 Hz, 2H), 7.32 (t, *J* = 7.5, 1 Hz, 2H), 5.28 (dt *J* = 92.6, 5.6 Hz), 4.43 (d, *J* = 7.0 Hz, 2H), 4.24 (t, *J* = 7.0 Hz, 1H), 4.04 (d, 5.5 Hz, 2H); <sup>13</sup>C NMR (125 MHz, CDCl<sub>3</sub>): δ 173.6, 156.5, 144.0, 141.6, 128.0, 127.3, 125.3, 120.3, 67.6, 47.3, 42.6 (d, <sup>1</sup>*J*<sub>CN</sub> = 13.8 Hz).

## NMR Spectroscopy of Peptides 1

*Sample Preparation.* NMR spectroscopy of peptides **1a** and **1b** was performed in D<sub>2</sub>O. The solutions were prepared by dissolving a weighed portion of the peptide in the appropriate volume of solvent. The molecular weights of the peptides were calculated as the TFA salts with all amino groups assumed to be protonated (**1a**, M.W. 2223.85 and **1b**, M.W. 2099.91). The solutions were allowed to stand for 24 h to allow complete hydrogen to deuterium exchange of the amide NH protons.

*<sup>1</sup>H NMR, TOCSY, ROESY, and NOESY Data Collection.* NMR spectra were recorded on a Bruker 600 MHz spectrometer with a TBI probe. Presaturation water suppression was applied as needed. TOCSY spectra were recorded with 2048 points in the  $f_2$  dimension and 512 increments in the  $f_1$  dimension with a 150-ms spin-lock mixing time. ROESY spectra were recorded with 2048 points in the  $f_2$  dimension and 512 increments in the  $f_1$  dimension with a 200-ms spin-lock mixing time. NOESY spectra were recorded with 2048 points in the  $f_2$  dimension and 512 increments in the  $f_1$  dimension with a 150-ms mixing time.

*<sup>1</sup>H NMR, TOCSY, ROESY, and NOESY Data Processing.* NMR spectra were processed with Bruker XwinNMR software. Automatic baseline correction was applied in both dimensions after phasing the spectra. TOCSY and ROESY spectra were Fourier transformed to a final matrix size of 2048 x 1024 real points using a Qsine weighting function and forward linear prediction. NOESY spectra were Fourier transformed to a final matrix size of 2048 x 2048 real points using a Qsine weighting function and forward linear prediction.



*Diffusion-Ordered Spectroscopy (DOSY) Experiments.* DOSY experiments were performed on a Bruker 500 MHz spectrometer equipped with a TCI cryoprobe, with a diffusion delay ( $\Delta$ ) of 75-ms and a diffusion gradient length ( $\delta$ ) of 2.5-ms. Sixteen sets of FIDs were recorded with the gradient strength incremented from 5%–95% using a linear ramp. The combined FIDs were Fourier transformed in Bruker's TopSpin™ software to give a pseudo-2D spectrum. After phasing and performing baseline correction, each pseudo-2D spectrum was processed with logarithmic scaling on the Y-axis. The Y-axis was calibrated to the diffusion coefficient of the residual HOD peak in D<sub>2</sub>O ( $1.9 \times 10^{-9} \text{ m}^2/\text{s}$  at 298 K).<sup>4</sup> The diffusion coefficients of the peptides were read and converted from logarithmic values to linear values.

### **NMR Spectroscopy of Peptides [<sup>15</sup>N]1**

*Sample Preparation.* NMR spectroscopy of peptides [<sup>15</sup>N]**1a** and [<sup>15</sup>N]**1b** was performed in 9:1 H<sub>2</sub>O/D<sub>2</sub>O. The solutions were prepared by dissolving a weighed portion of the peptide in the appropriate volume of solvent. The molecular weights of the peptides were calculated as the TFA salts with all amino groups assumed to be protonated ([<sup>15</sup>N]**1a**, M.W. 2224.85 and [<sup>15</sup>N]**1b**, M.W. 2100.91). 4,4-Dimethyl-4-silapentane-1-ammonium trifluoroacetate (DSA) was added as an internal standard for referencing chemical shifts.<sup>5</sup>

*<sup>1</sup>H NMR, <sup>1</sup>H,<sup>15</sup>N HSQC, and <sup>1</sup>H,<sup>15</sup>N NOESY-HSQC (<sup>15</sup>N-edited NOESY) Data Collection.* NMR spectra were recorded on a Bruker 600 MHz spectrometer with either a TBI probe or a BBFO cryoprobe. Gradient water suppression was applied as needed. <sup>1</sup>H,<sup>15</sup>N HSQC spectra were recorded with 1024 points in the  $f_2$  dimension and 512 increments in the  $f_1$  dimension. <sup>1</sup>H,<sup>15</sup>N NOESY-HSQC spectra were recorded with a 150-ms mixing time, and with 2048 points in the  $f_3$  dimension (<sup>1</sup>H), 1 increment in the  $f_2$  dimension (<sup>15</sup>N), and 1024 increments in the  $f_1$  dimension (<sup>1</sup>H).

*<sup>1</sup>H NMR, <sup>1</sup>H,<sup>15</sup>N HSQC, and <sup>1</sup>H,<sup>15</sup>N NOESY-HSQC (<sup>15</sup>N-edited NOESY) Data Processing.* NMR spectra were Fourier transformed in Bruker XwinNMR software with forward linear prediction and a Qsinc weighting function. Automatic baseline correction was applied in both dimensions after phasing the spectra. The <sup>1</sup>H,<sup>15</sup>N HSQC spectra were processed to a final matrix size of 2048 x 1024 real points and with GB = 0.1 in the  $f_2$  dimension. The <sup>1</sup>H,<sup>15</sup>N NOESY-HSQC spectra were processed to a final 2D matrix size of 4096 x 2048 real points ( $f_3, f_1$ ) and with GB = 0.05 in both dimensions.

### **Molecular Modeling of Peptides 1a and 1b.**

Molecular models of the tetramers of peptides **1a** and **1b** were generated from the X-ray crystallographic structure of a similar macrocyclic  $\beta$ -sheet peptide (PDB 3T4G). This peptide contains AIIGLMV ( $A\beta_{30-36}$ ) in the heptapeptide strand and KFF<sup>Br</sup>K in positions R<sub>8</sub>-R<sub>11</sub> in the template strand. The PDB coordinates were imported into PyMOL. Symmetry mates were generated to create two hydrogen-bonded dimers sandwiched on the surface displaying the side chains of A<sub>30</sub>, I<sub>32</sub>, L<sub>34</sub>, and V<sub>36</sub>. The alignment of each dimer was shifted by two residues to match the alignment of the dimers of peptides **1a** and **1b**. The residues of the dimers were mutated to match peptide **1a** or peptide **1b**, and the side chain torsion angles of  $\chi_1$  and  $\chi_2$  were adjusted for Ile (180° and 60°) and Phe (180°). The dimers were then rotated manually to reflect the observed interlayer NOEs between Ile<sub>11</sub> and the methoxy group of Hao.

The coordinates were exported from PyMOL. [Note that .pdb was used, but .mol2 file format is actually preferable and is recommended instead of .pdb.] The file was imported into MacroModel with the Maestro user interface. Atom types and bond orders were edited as needed to correct errors in bond type and charge. Distance constraints were applied to reflect the folding and dimerization of the macrocycles. Four interlayer distance constraints between the  $\delta$ -methyl group of Ile<sub>11</sub> and the methoxy group of Hao were applied to reflect the observed interlayer contacts. Minimization was performed with the MMFFs force field and GB/SA water solvation. All constraints were removed and minimization was repeated to generate a minimum-energy conformation (local minimum). The coordinates were exported in .pdb file format and imported into PyMOL.

### III. REFERENCES

1. Pangborn, A. B.; Giardello, M. A.; Grubbs, R. H.; Rosen, R. K.; Timmers, F. J. *Organometallics* **1996**, *15*, 1518–1520.
2. (a) Nowick, J. S.; Chung, D. M.; Maitra, K.; Maitra, S.; Stigers, K. D.; Sun, Y. *J. Am. Chem. Soc.* **2000**, *122*, 7654–7661; (b) Cheng, P.-N.; Nowick, J. S. *J. Org. Chem.* **2011**, *76*, 3166–3173.
3. Podlech, J.; Gurrath, M.; Müller, G. 9-Fluorenylmethoxycarbonyl Group. In *Houben-Weyl Methods of Organic Chemistry*, Goodman, M., Ed. Thieme: Stuttgart, 2003; Vol. E22a, p 61.
4. Longworth, L. G. *J. Phys. Chem.* **1960**, *64*, 1914–1917.
5. Nowick, J. S.; Khakshoor, O.; Hashemzadeh, M.; Brower, J. O. *Org. Lett.* **2003**, *5*, 3511–3513.

### IV. CHARACTERIZATION DATA

RP-HPLC of peptide 1a

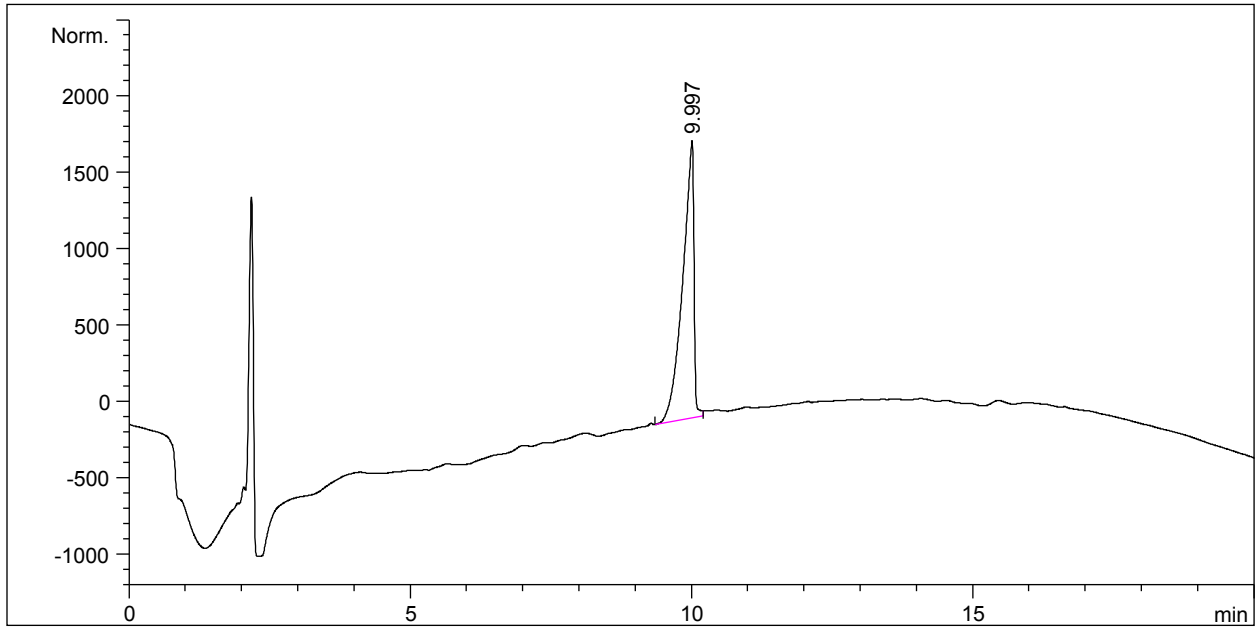

| Peak #   | RetTime [min] | Type | Width [min] | Area mAU*s | Height [mAU] | Area %   |
|----------|---------------|------|-------------|------------|--------------|----------|
| 1        | 9.997         | BV   | 0.1928      | 2.50833e4  | 1820.18323   | 100.0000 |
| Totals : |               |      |             | 2.50833e4  | 1820.18323   |          |

**column:** Aeris XB-C18 2.6μ  
**dimensions:** 150 mm x 4.6 mm  
**mobile phase:** A: H<sub>2</sub>O, 0.1% TFA  
 B: CH<sub>3</sub>CN, 0.1% TFA  
**gradient:** A/B (95:5) to (0:100) in 20 min  
**flow rate:** 1.0 mL/min  
**detection:** VWD, wavelength = 214 nm  
**temperature:** 298 K

MS (ESI) of peptide 1a

NT\_iv\_1a-1 24 (0.440) Sb (1,10.00); Sm (Mn, 4x3.00); Cm (23:31)

TOF MS ES+  
1.44e3

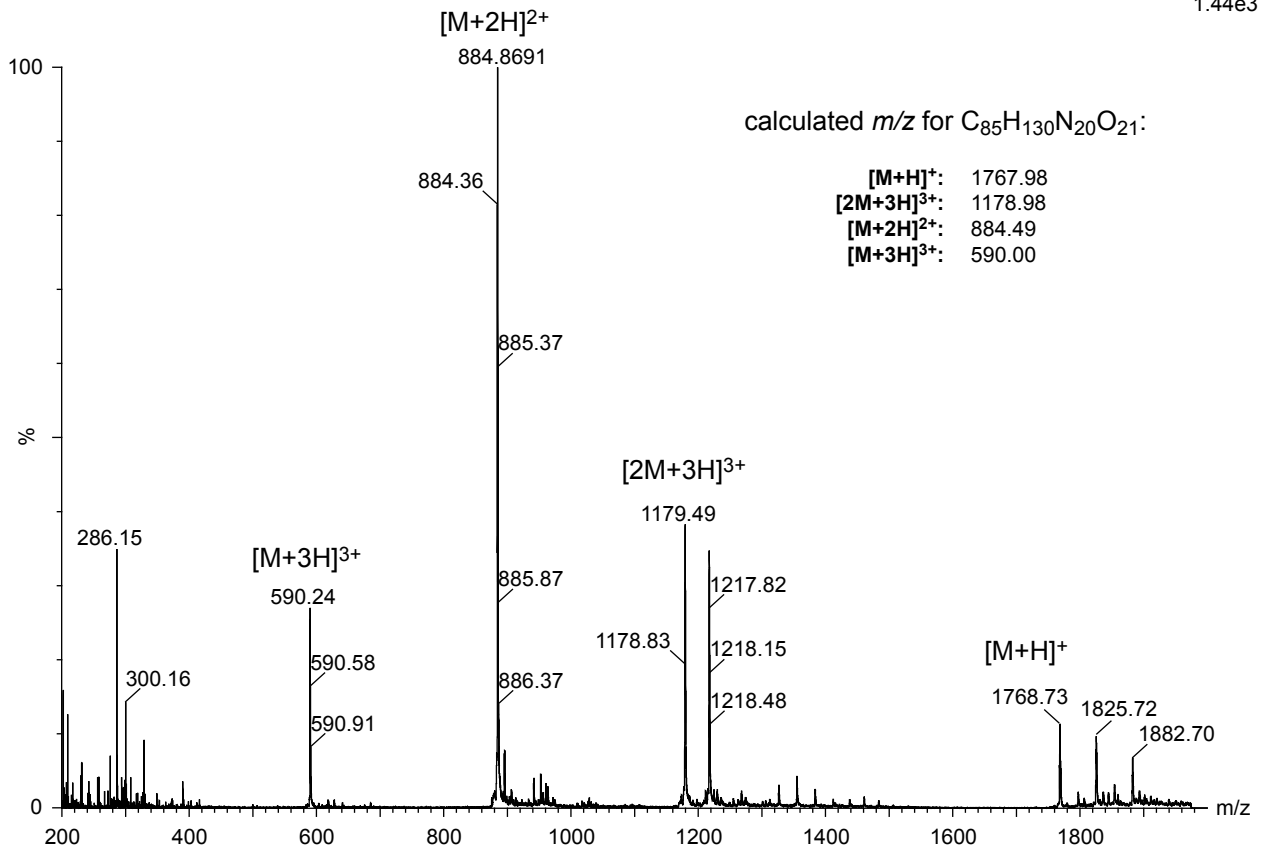

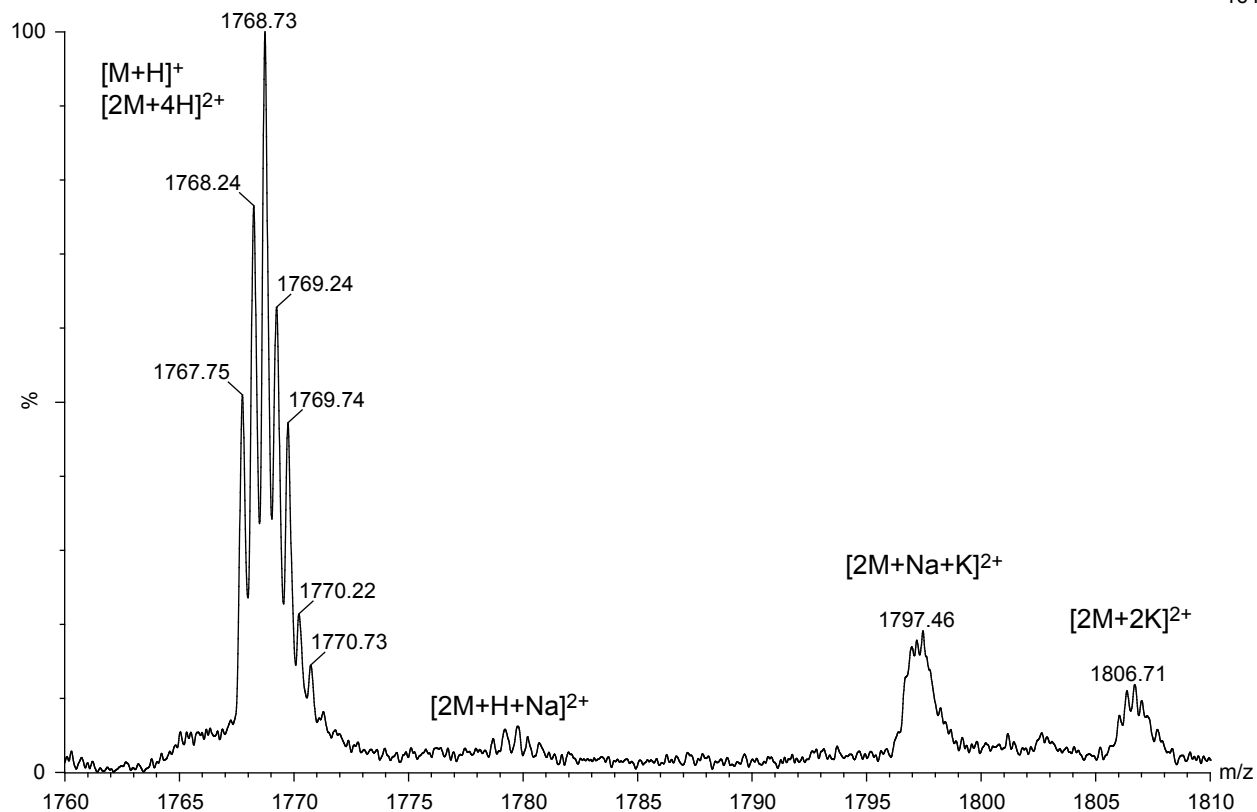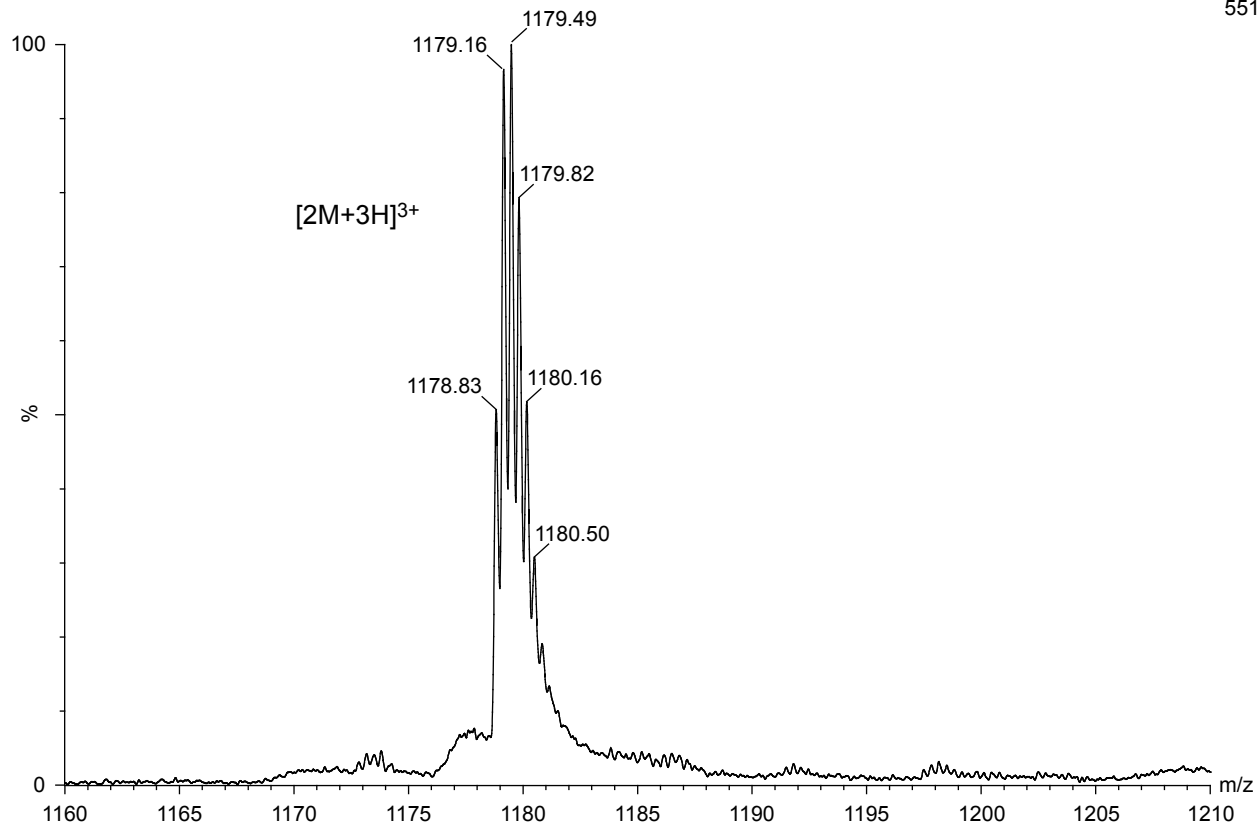

NT\_iv\_1a-1 24 (0.440) Sb (1,10.00); Sm (Mn, 4x3.00); Cm (23:31)

TOF MS ES+  
1.44e3

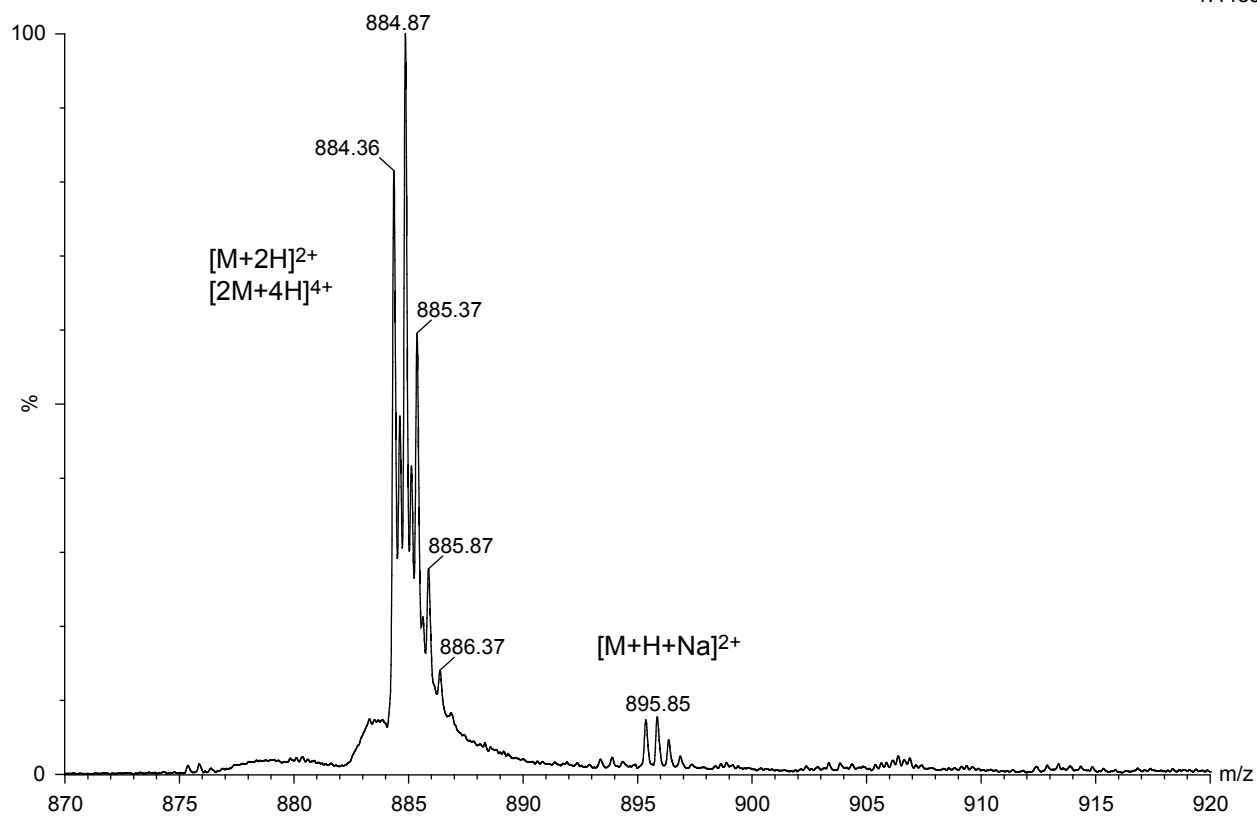

NT\_iv\_1a-1 24 (0.440) Sb (1,10.00); Sm (Mn, 4x3.00); Cm (23:31)

TOF MS ES+  
389

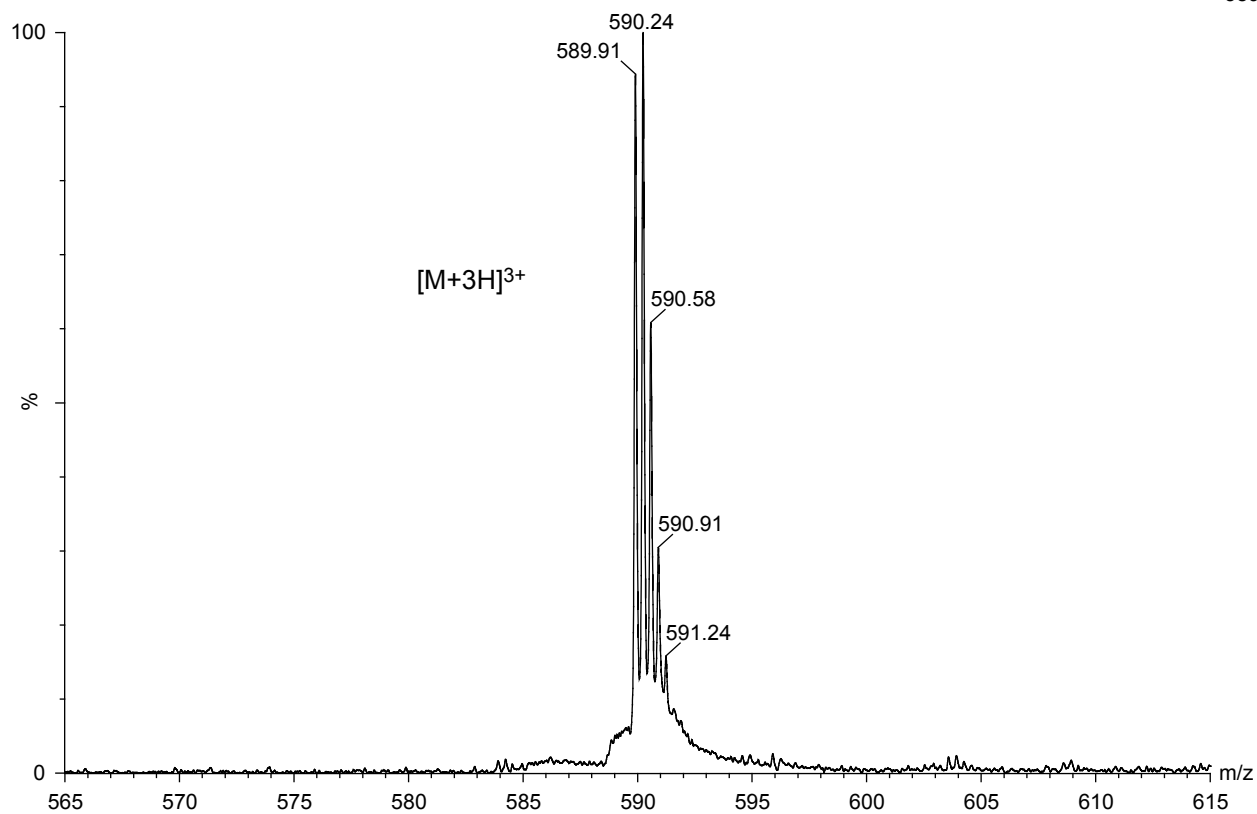

**<sup>1</sup>H NMR of peptide 1a, 0.15 mM in D<sub>2</sub>O at 600 MHz and 293 K**

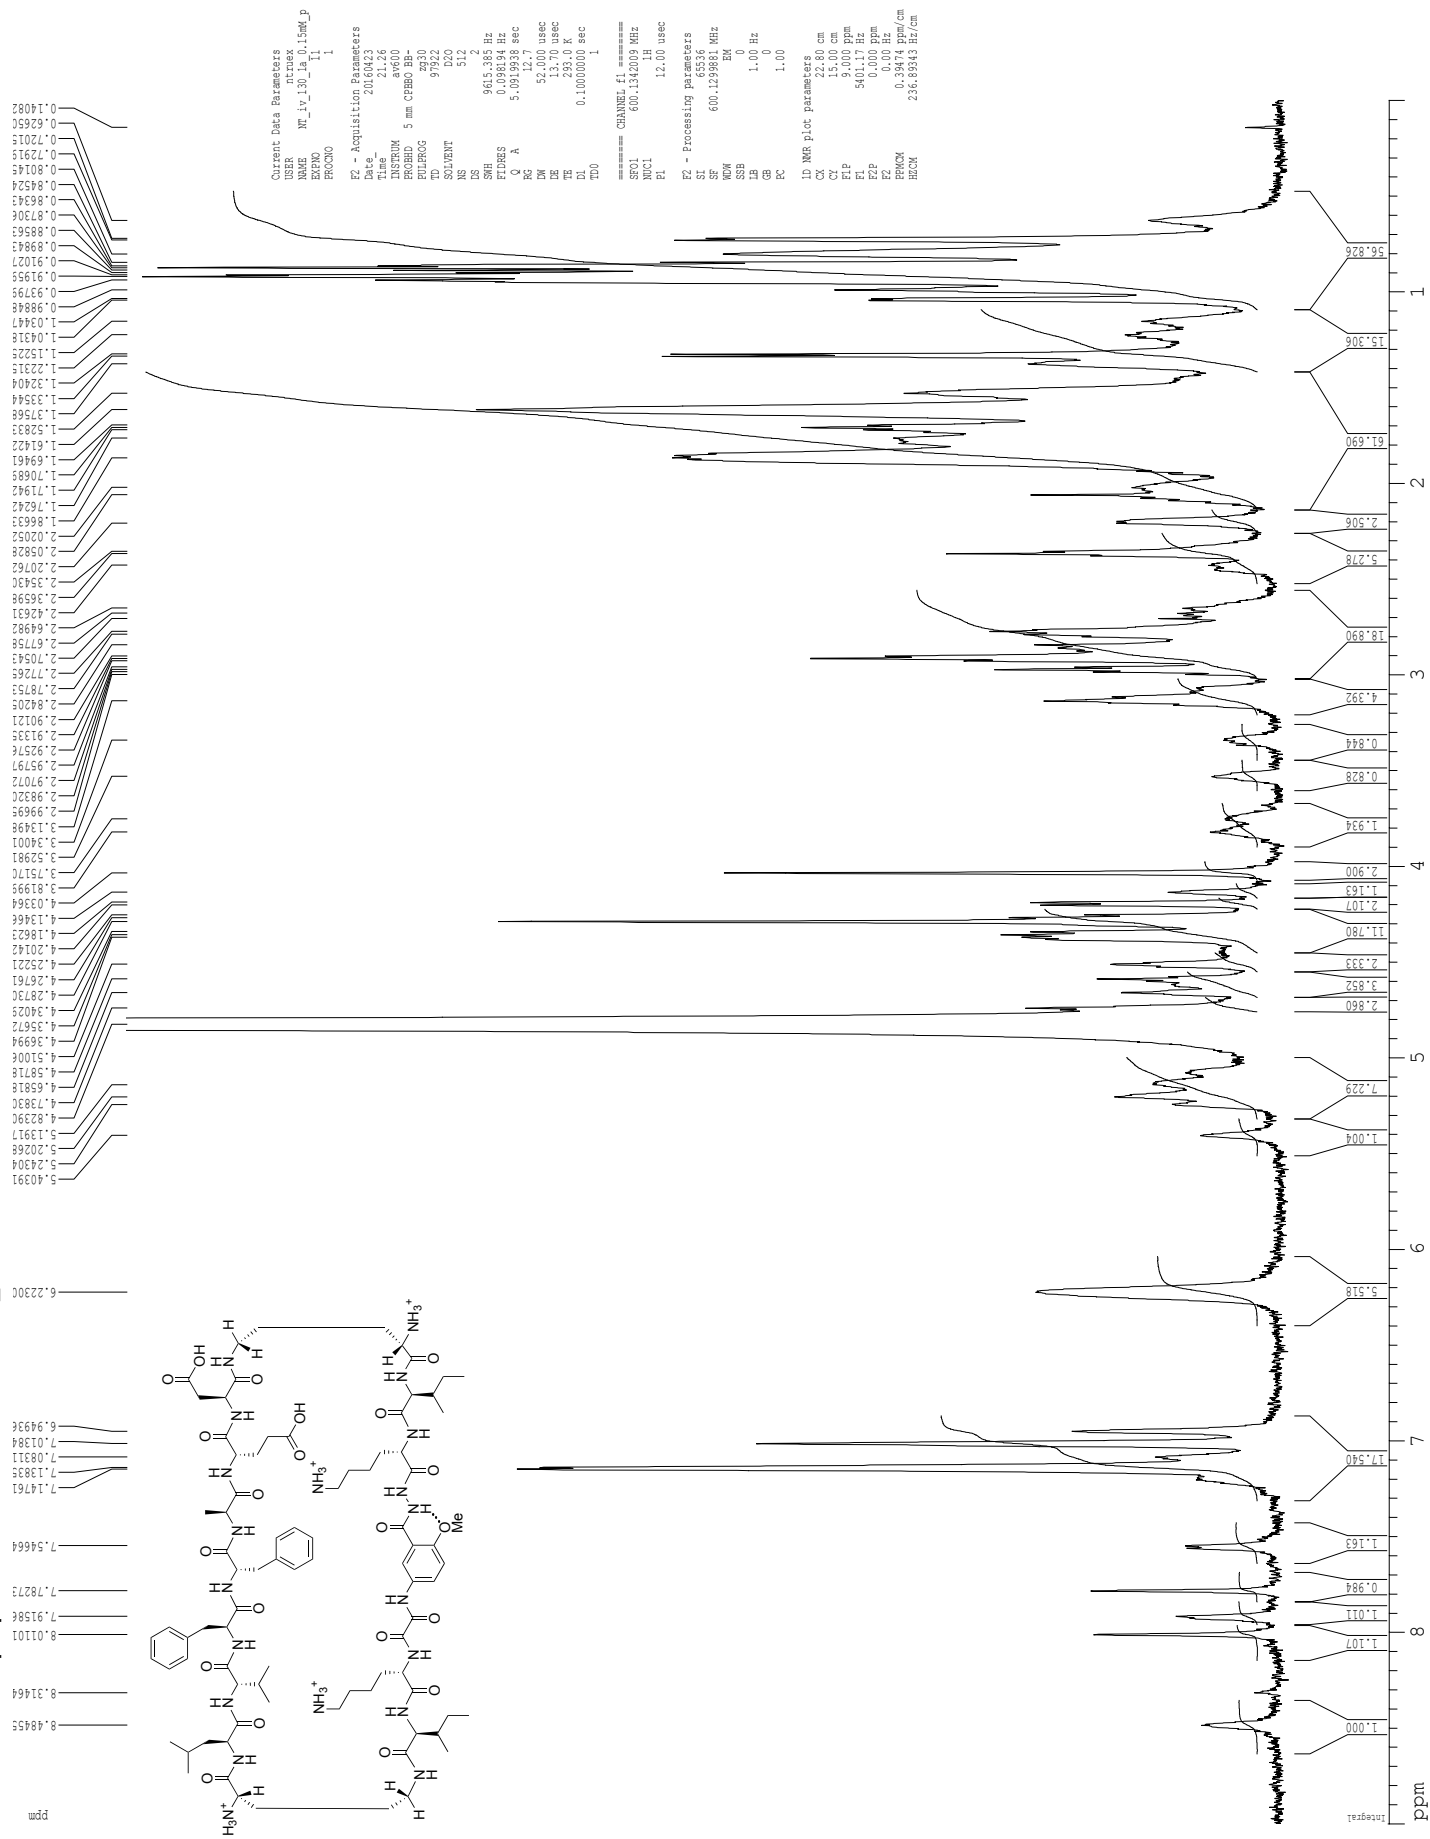



# 1H NMR of peptide 1a, 0.15 mM in D<sub>2</sub>O at 600 MHz and 293 K

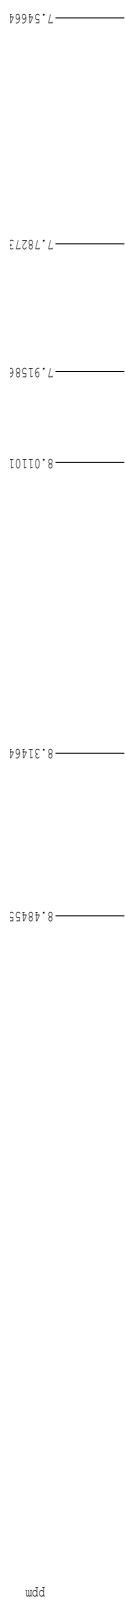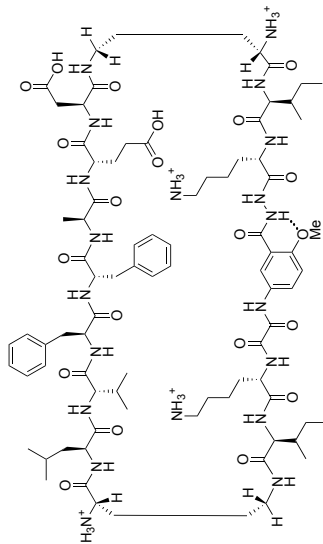

```

Current Data Parameters
Name          W1_iv_130_0106_0.15mM_P
Date_       20101122
Time        21:22
INSTRUM     AV400
PROCBD     5 mm CFEPO BB-
PULPROG     zg30
TD          9722
SOLVENT     DMS
NS          2
DS          2
AQ          9615.385 Hz
SFO1        600.1342009 MHz
FIDRES     0.098394 Hz
AQ         8.091995 sec
RG          65536
RW          52.000 usec
RE          13.70 usec
TE          293.0 K
DE          0.10000000 sec
TD0         1

===== CHANNEL f1 =====
SFO1        600.1342009 MHz
NUC1        1H
P1          12.00 usec

F2 - Processing parameters
SI          65536
SF          600.1342009 MHz
WDW         EM
SSB         0
GB          0
PC          1.00

ID NMR plot parameters
CX          22.80 cm
CY          15.00 cm
CZ          10.00 cm
F1          6.00000000 MHz
F2          5621.02000000 Hz
F3          7.400000000000 ppm
Z1          4440.96 Hz
Z2          0.078645 ppm/cm
Z3          41.3868 Hz/cm
  
```

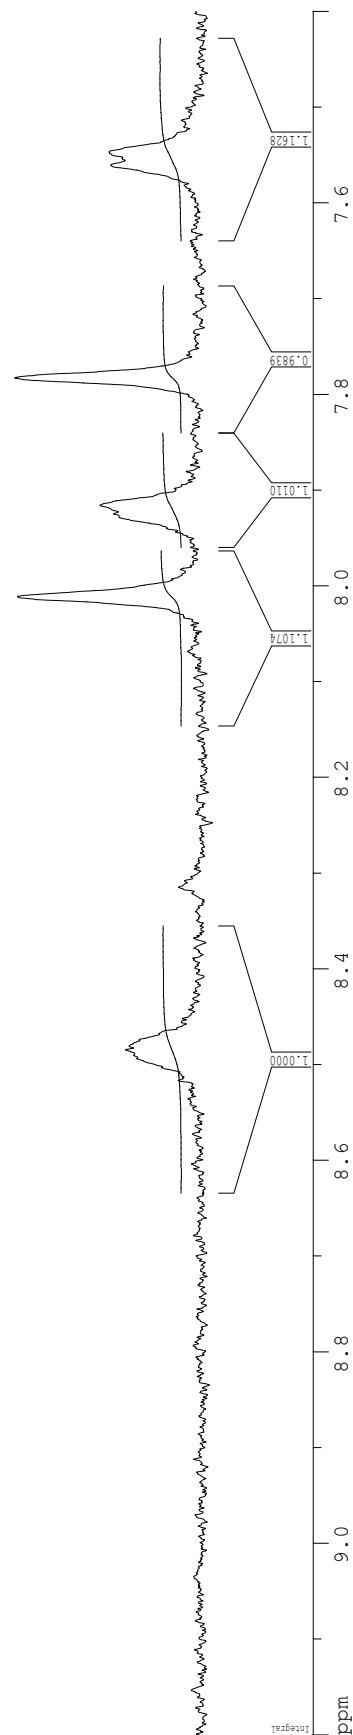

# 1H NMR of peptide 1a, 0.15 mM in D2O at 600 MHz and 293 K

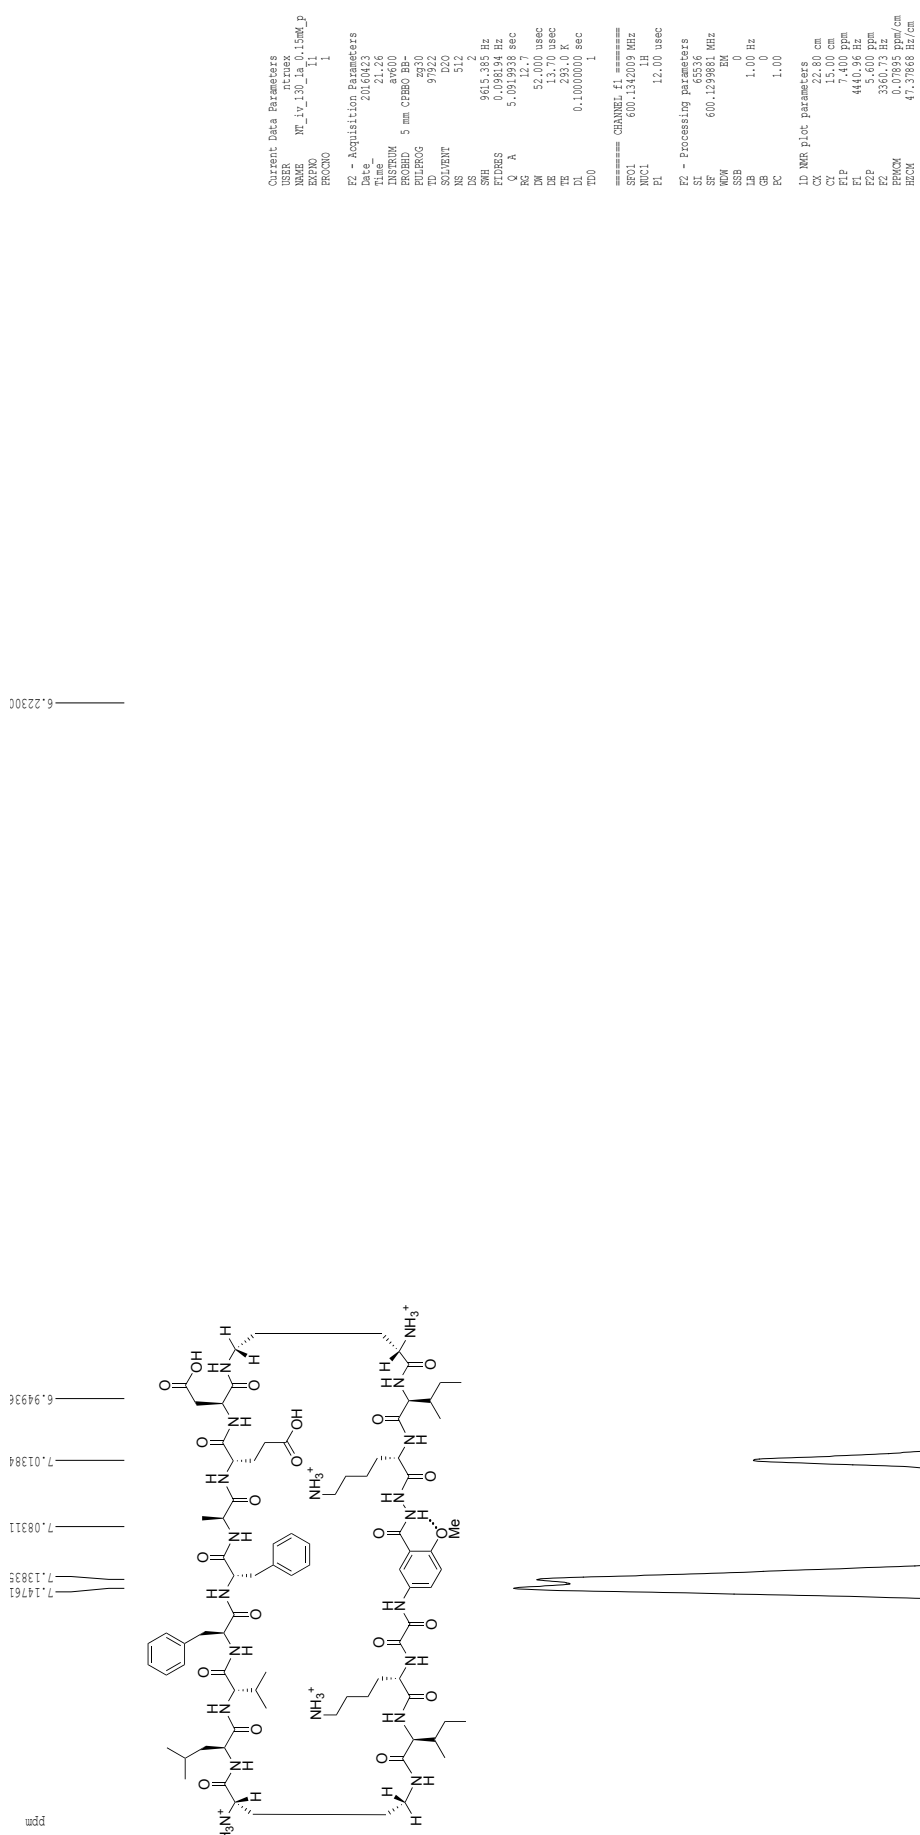

**<sup>1</sup>H NMR of peptide 1a, 0.15 mM in D<sub>2</sub>O at 600 MHz and 293 K**

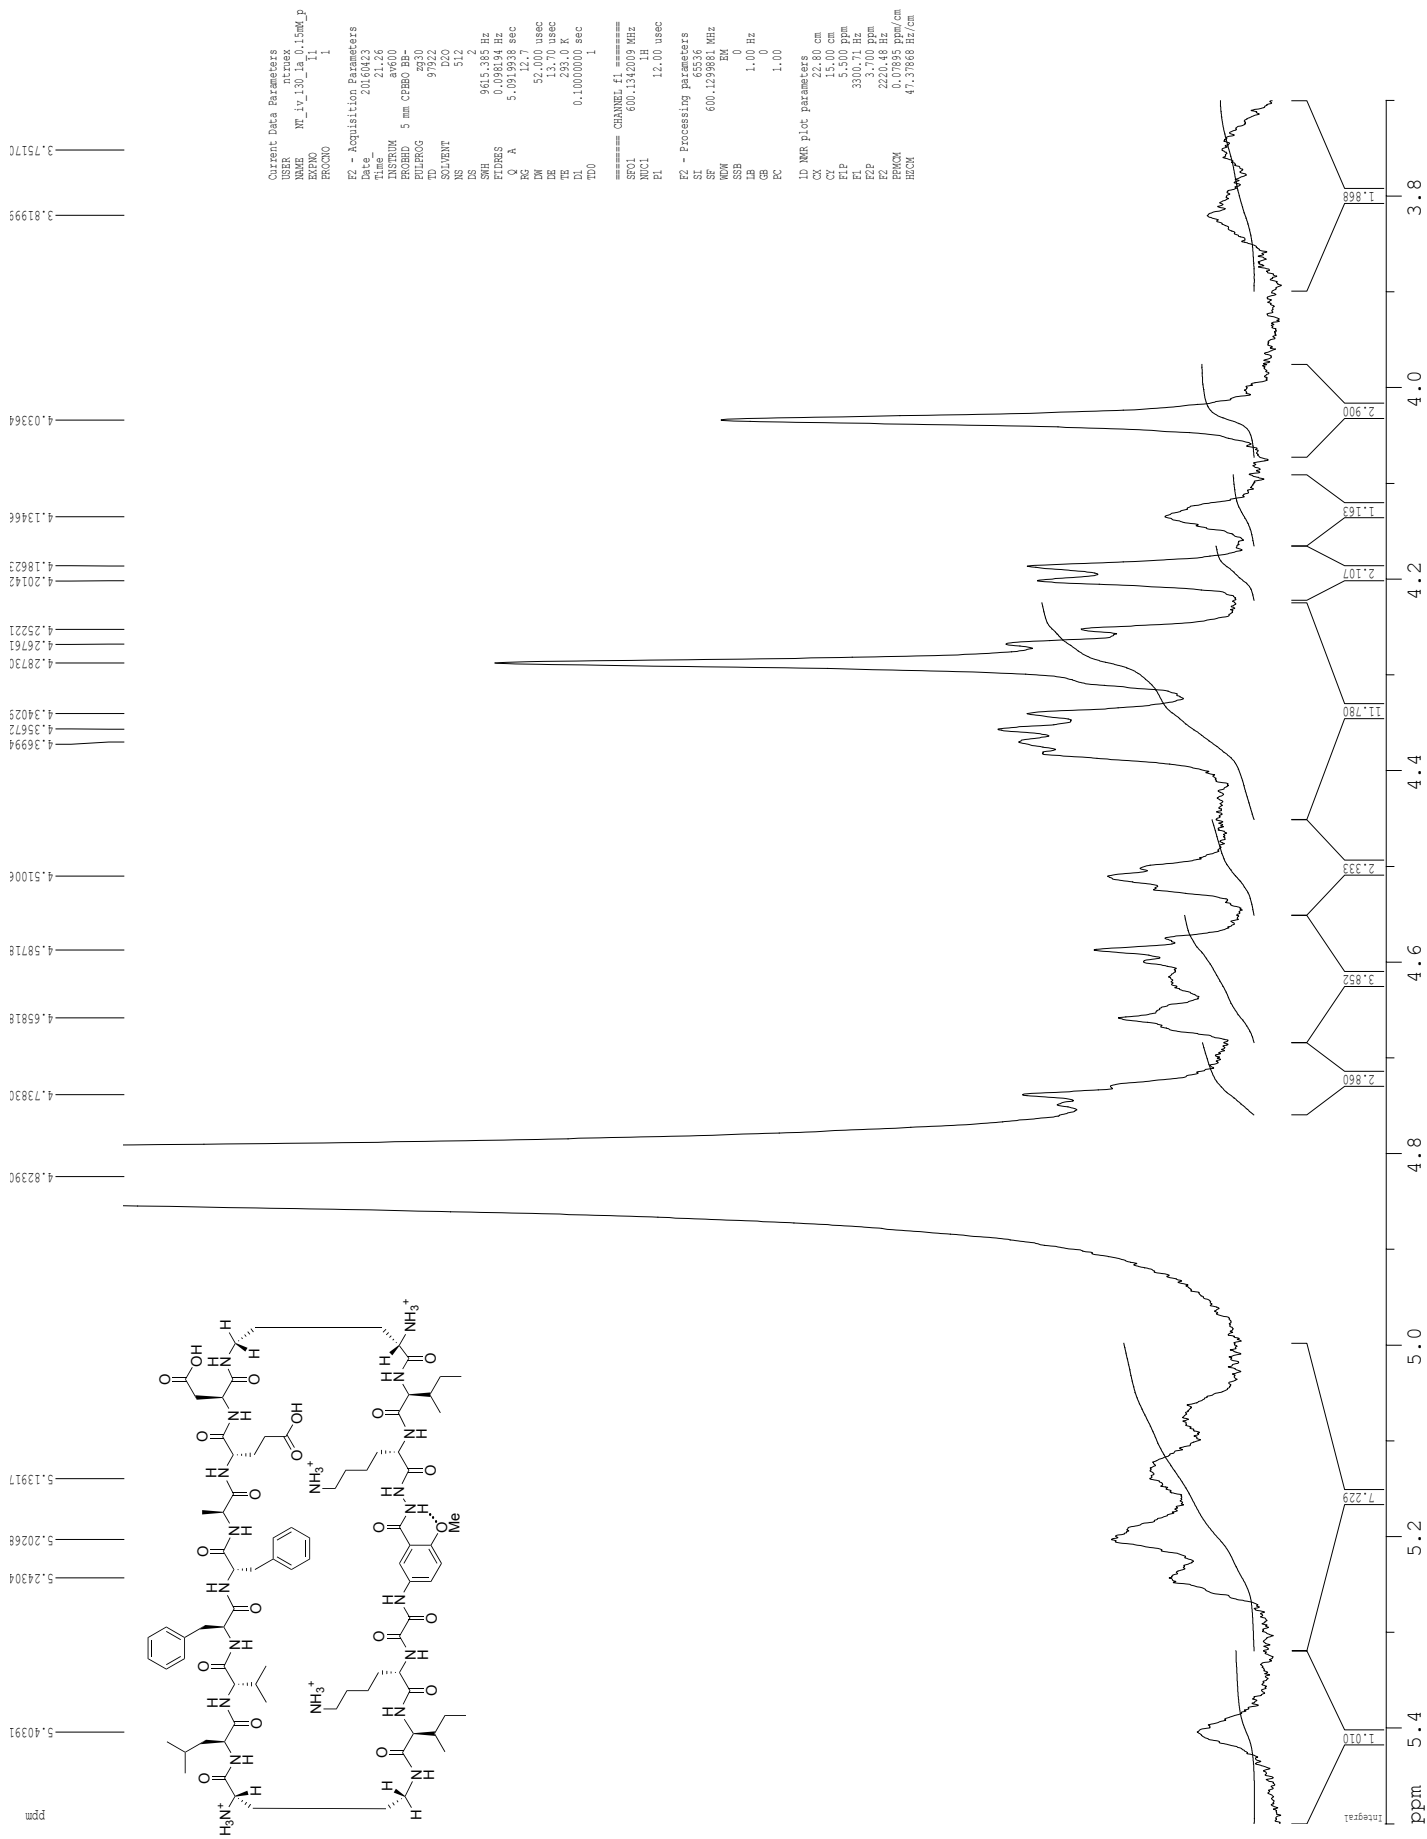

Current Data Parameters  
 Name: WT\_iv\_130\_16  
 Date\_1: 11/15/06  
 Date\_2: 11/15/06  
 PROCNO: 1  
 F2 - Acquisition Parameters  
 Date\_1: 11/15/06  
 Date\_2: 11/15/06  
 Time: 21:22  
 INSTRUM: AV600  
 PROCNO: 5  
 PULPROG: zgpg30  
 TD: 65536  
 SFO1: 600.136045 MHz  
 FREQ1: 600.136045 MHz  
 CHANNEL: f1  
 NUC1: <sup>1</sup>H  
 P1: 12.00 usec  
 F2 - Processing parameters  
 SI: 65536  
 SF: 600.136045 MHz  
 WDW: EM  
 SSB: 0  
 CB: 0  
 AB: 0  
 PC: 1.00  
 ID NMR plot parameters  
 CX: 22.80 cm  
 CY: 15.00 cm  
 CZ: 5.00 cm  
 FI: 3300.71 Hz  
 F2: 3.700 ppm  
 F3: 2201.45 Hz  
 REF1: 0.07895 ppm/cm  
 REF2: 471.37868 Hz/cm

# <sup>1</sup>H NMR of peptide 1a, 0.15 mM in D<sub>2</sub>O at 600 MHz and 293 K

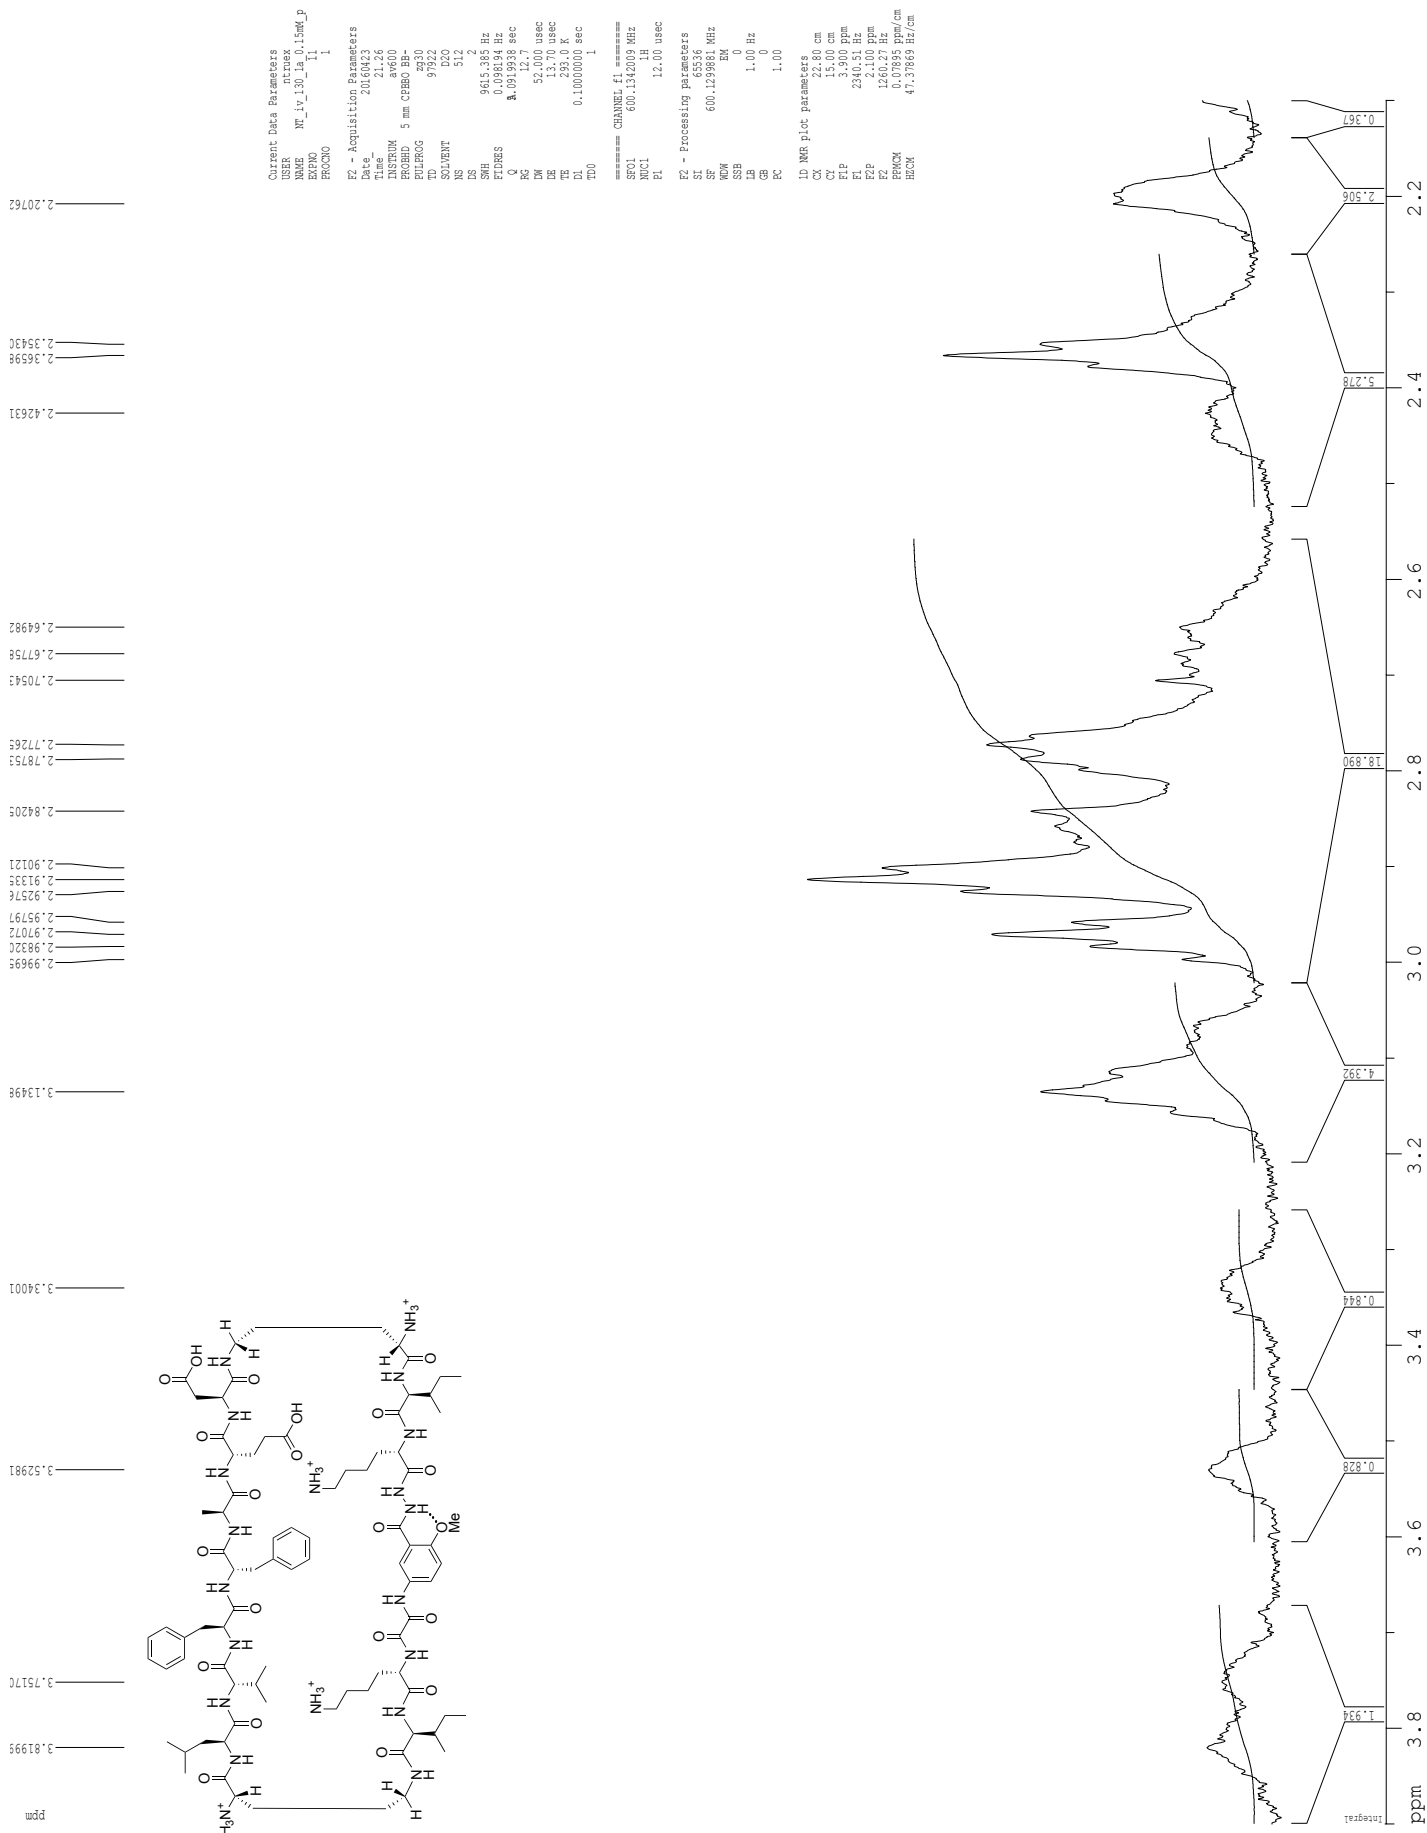

```

Current Data Parameters
=====
Name          W1_iv_130_06_15mF_P
Date_         20070722
Time_         21:22
INSTRUM      AV400
PROBHD       5 mm CPBBO BB-
PULPROG      zg30
TD           65536
AQ           9.7222
RG           327.5
NS           2
DS           2
SFO1         600.1342009 MHz
NUC1         1H
PC           12.00 usec
=====
F2 - Acquisition Parameters
=====
Date_         20070722
Time_         21:22
INSTRUM      AV400
PROBHD       5 mm CPBBO BB-
PULPROG      zg30
TD           65536
AQ           9.7222
RG           327.5
NS           2
DS           2
SFO1         600.1342009 MHz
NUC1         1H
PC           12.00 usec
=====
F2 - Processing parameters
=====
SI           65536
SF           600.1342009 MHz
WDW          EM
SSB          0
GB           0
PC           1.00
=====
ID NMR plot parameters
=====
CX           22.80 cm
CY           15.00 cm
CZ           3.00 cm
F1           2340.51 Hz
F2           2.100 ppm
F3           12961.27 Hz
RG          0.078945 ppm/cm
SFO1         600.1342009 MHz
=====

```

# <sup>1</sup>H NMR of peptide 1a, 0.15 mM in D<sub>2</sub>O at 600 MHz and 293 K

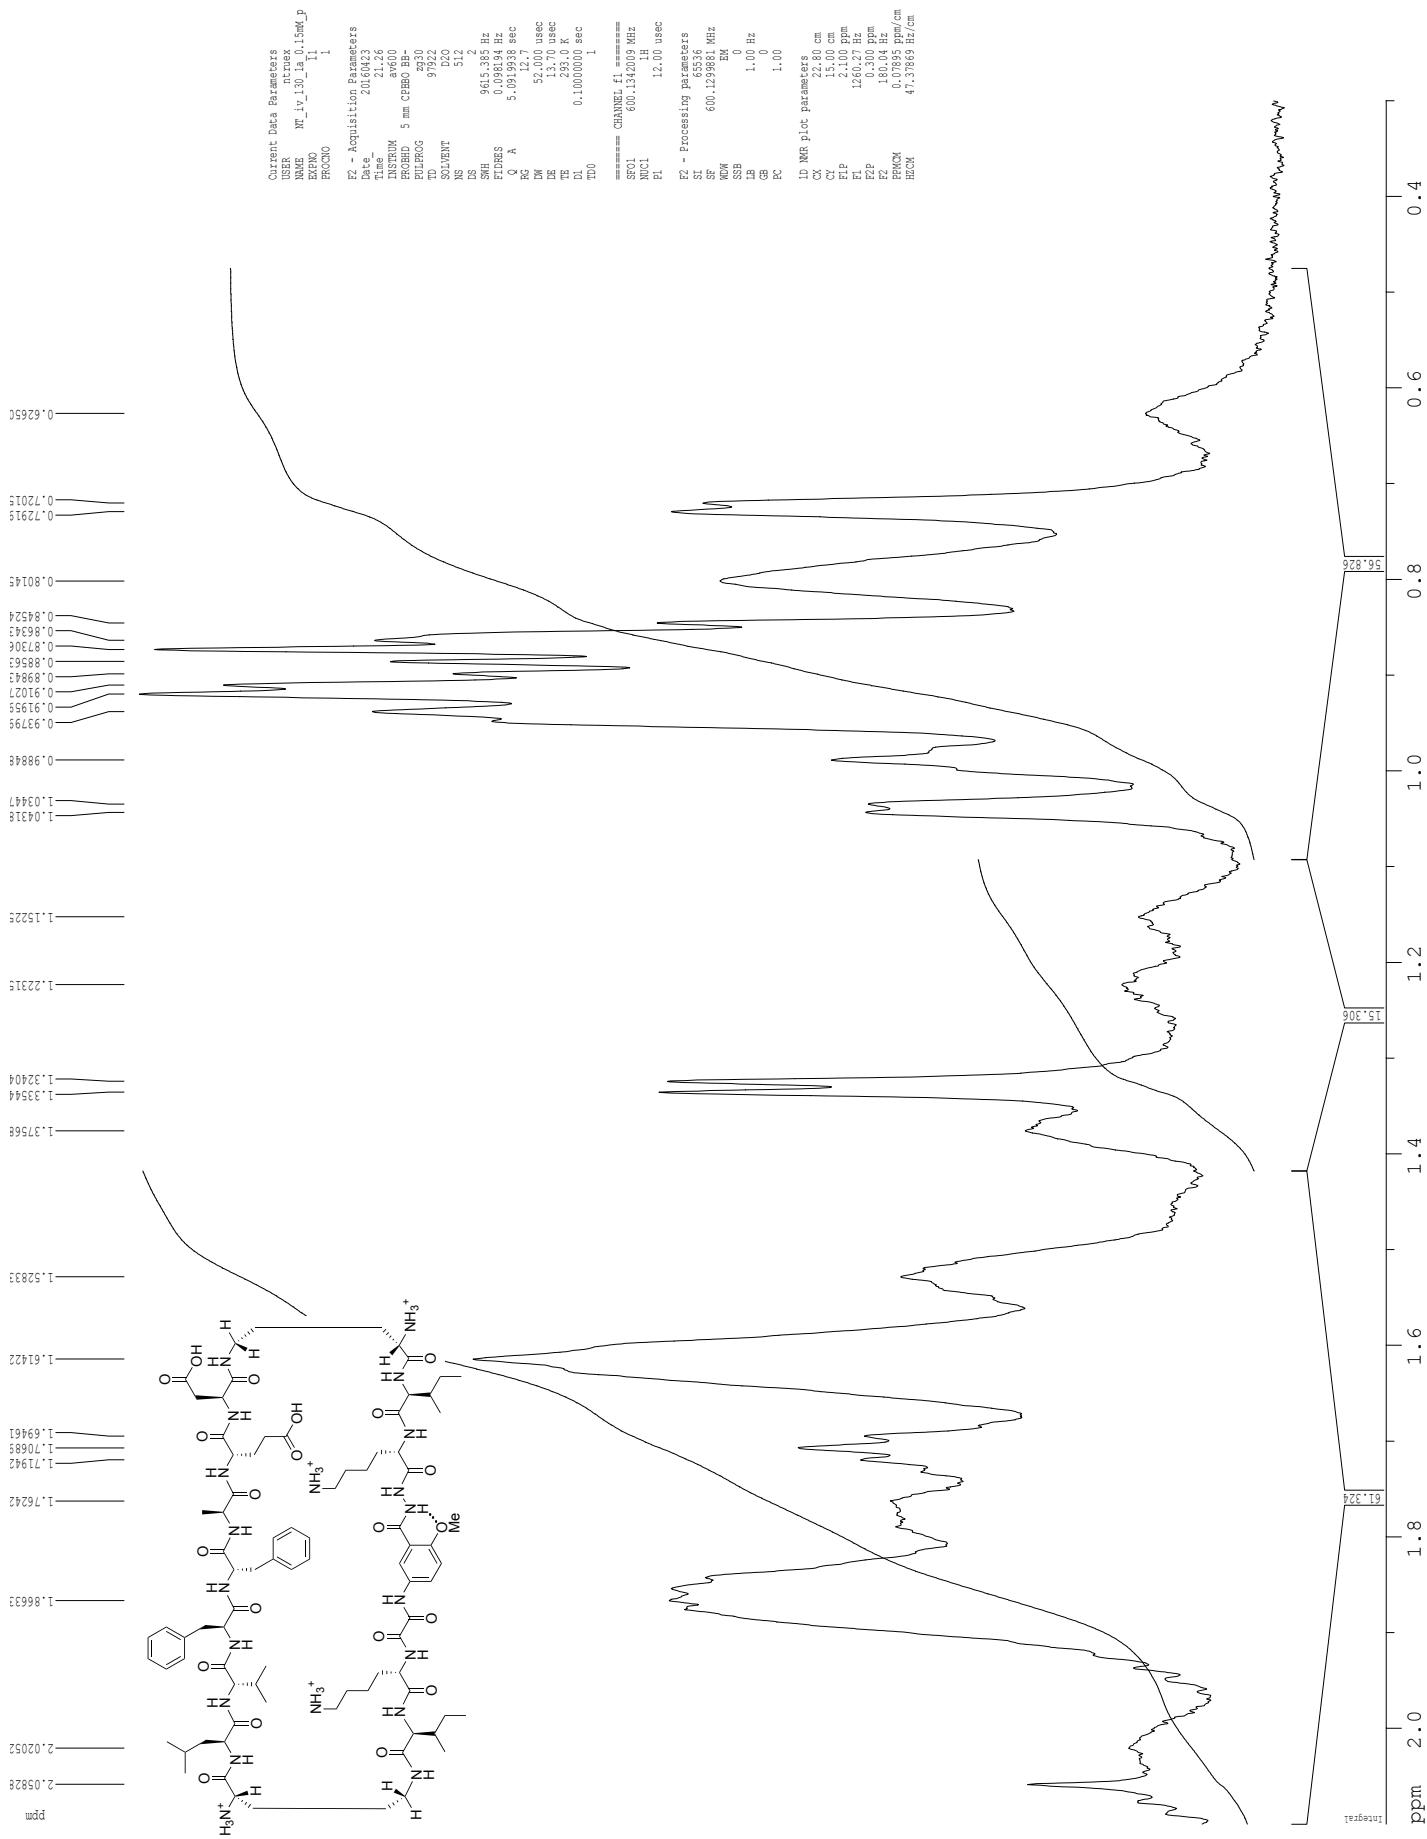

$^1\text{H}$  NMR 2D TOCSY of peptide **1a** with presaturation suppression of the HOD peak  
0.15 mM in  $\text{D}_2\text{O}$  at 600 MHz and 293 K with 150-ms spin-lock mixing time

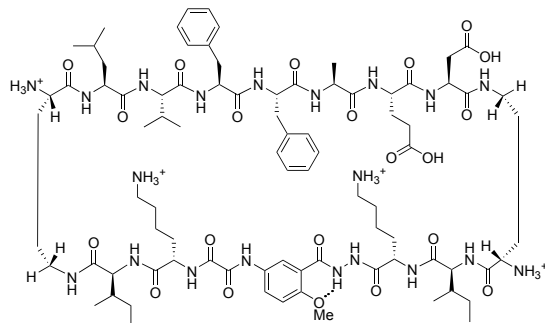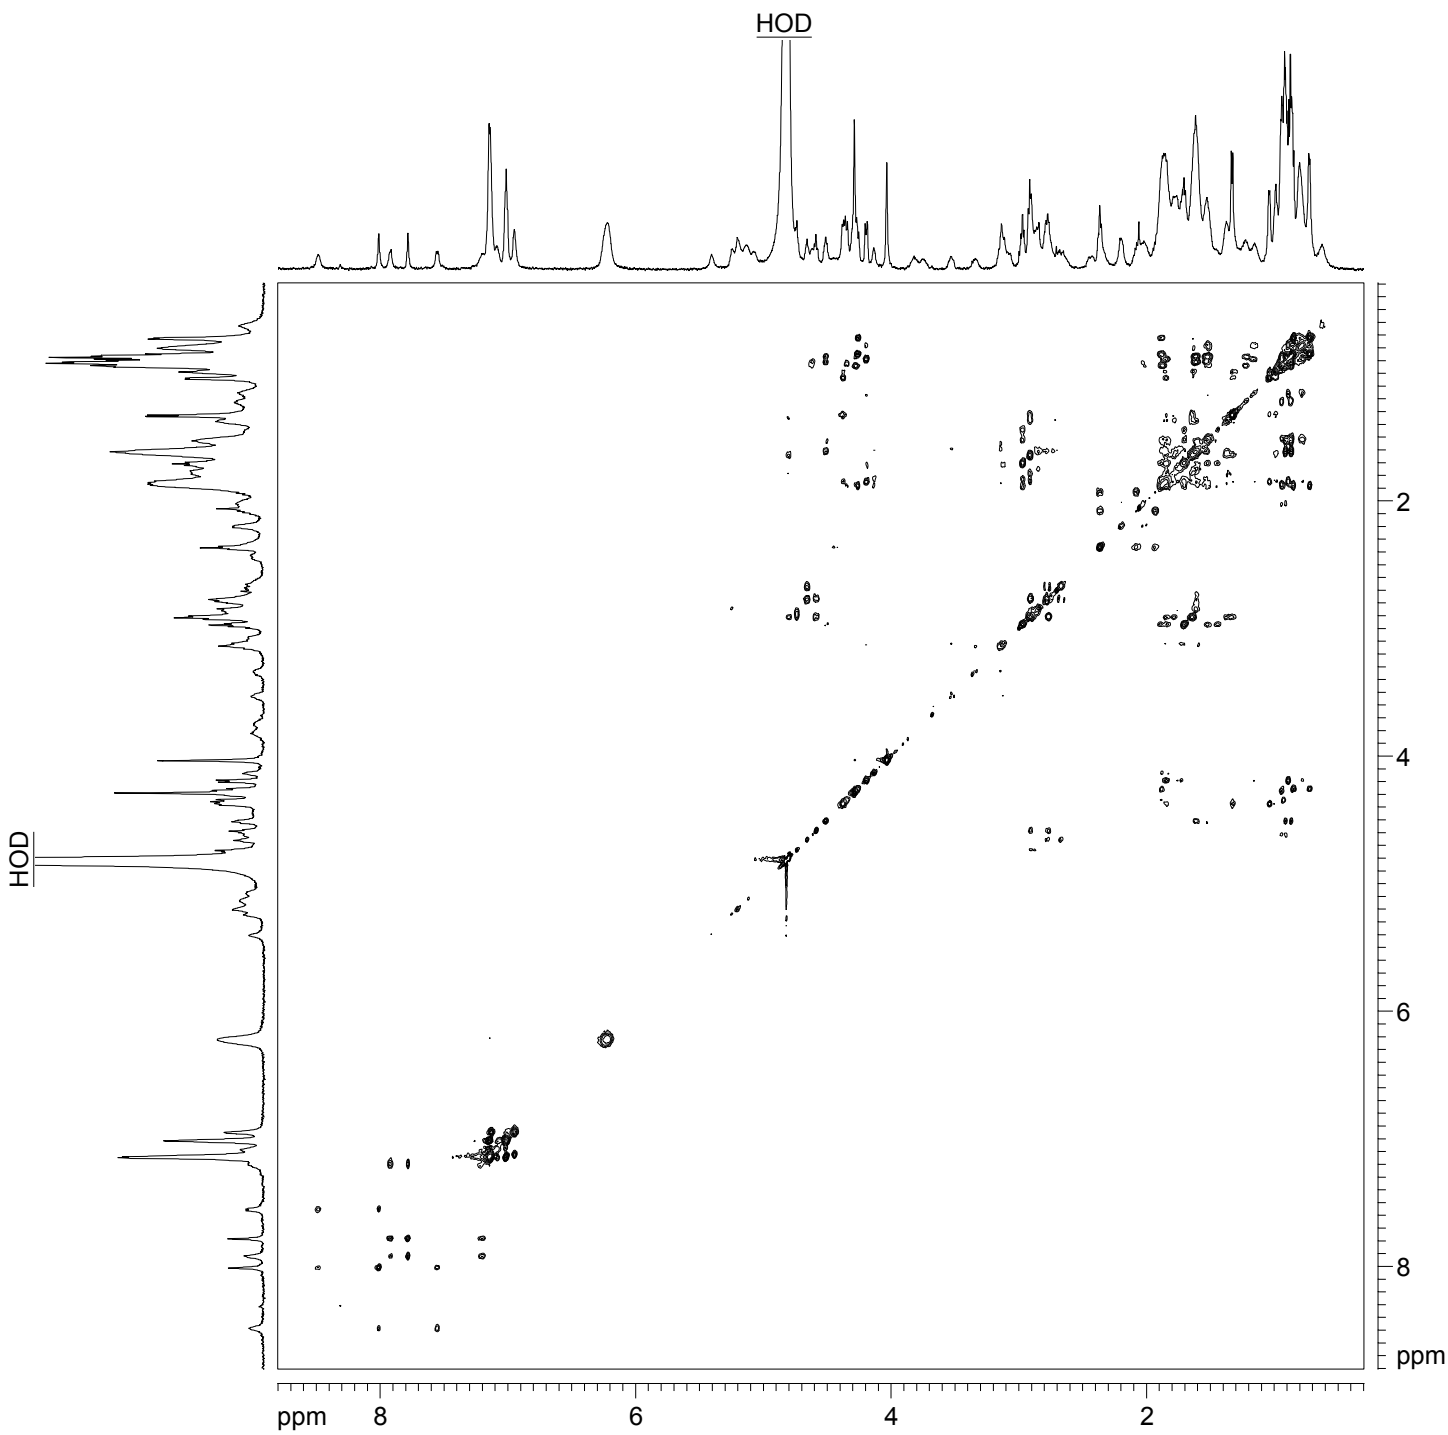

$^1\text{H}$  NMR 2D TOCSY of peptide **1a** with presaturation suppression of the HOD peak  
0.15 mM in  $\text{D}_2\text{O}$  at 600 MHz and 293 K with 150-ms spin-lock mixing time

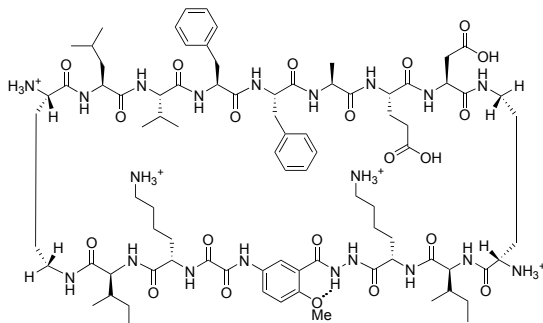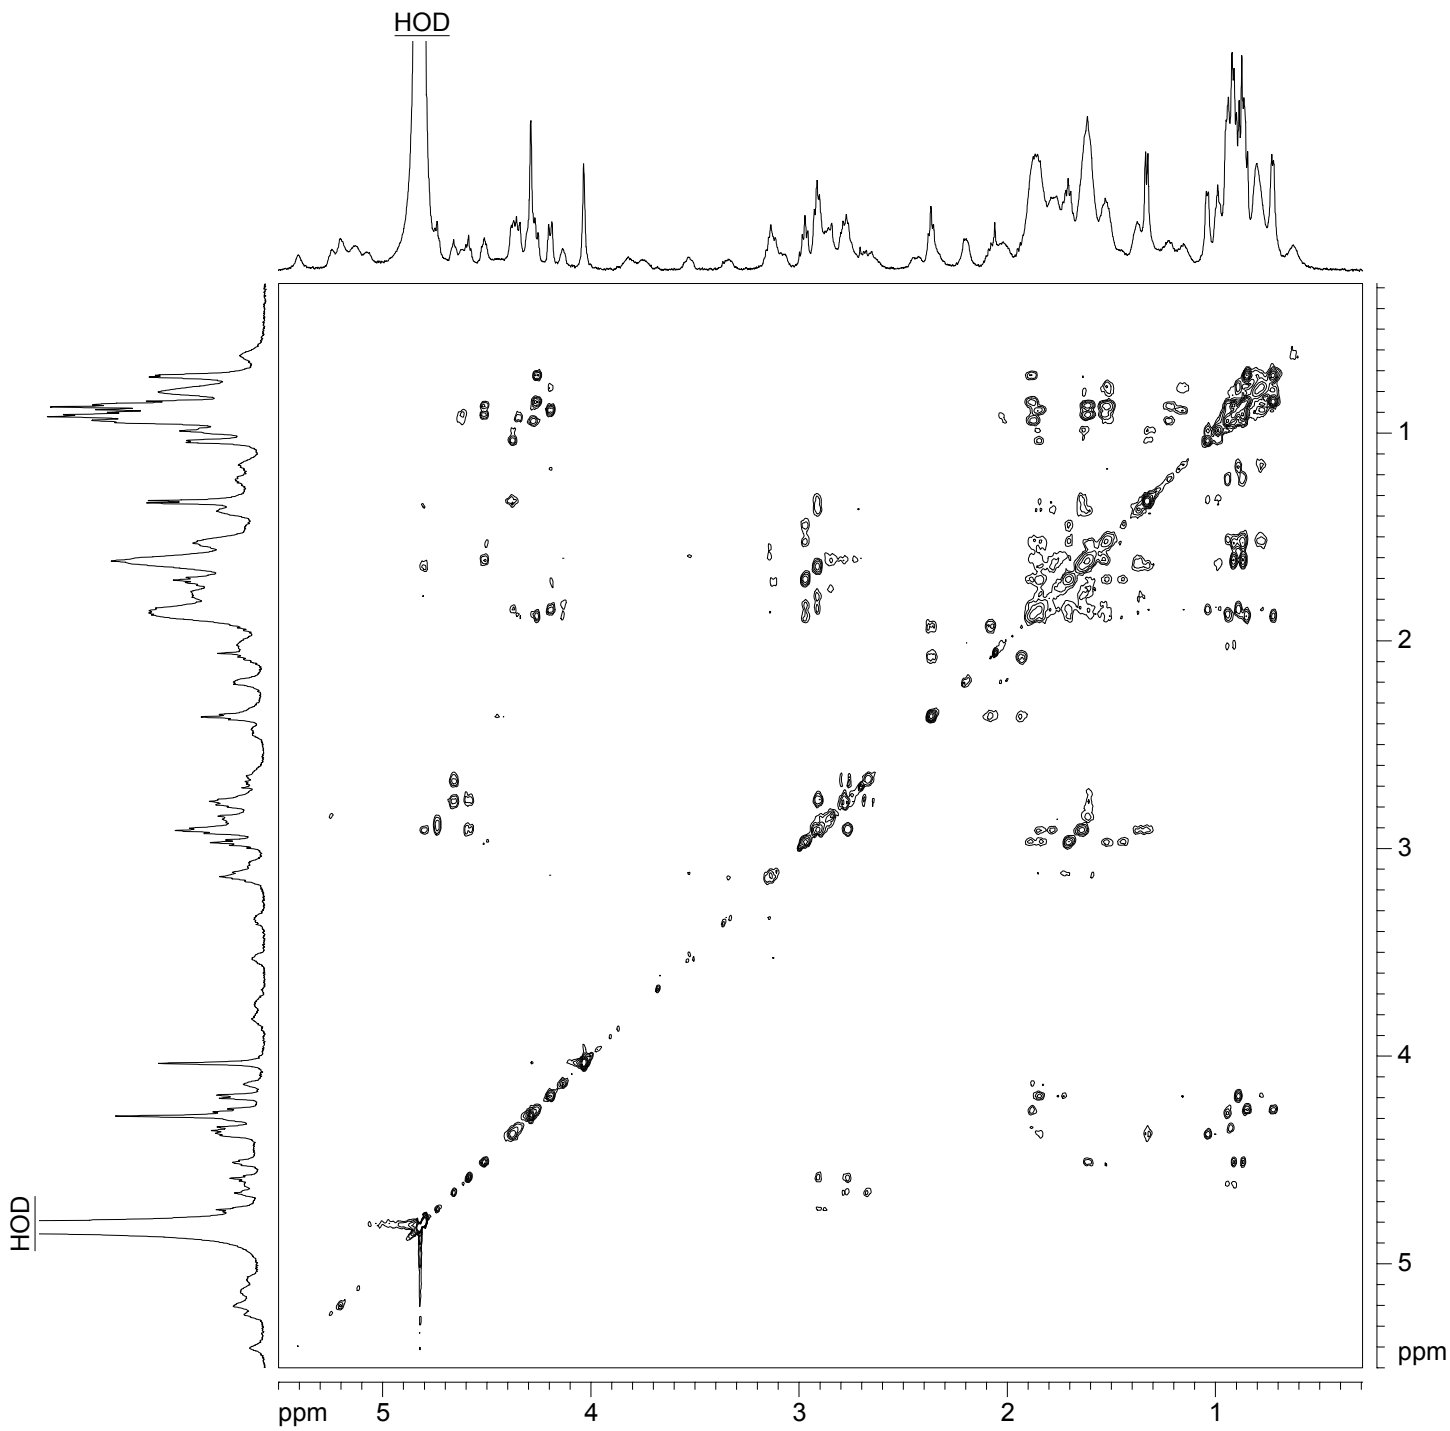

$^1\text{H}$  NMR 2D ROESY of peptide **1a** with presaturation suppression of the HOD peak  
0.15 mM in  $\text{D}_2\text{O}$  at 600 MHz and 293 K with 200-ms spin-lock mixing time

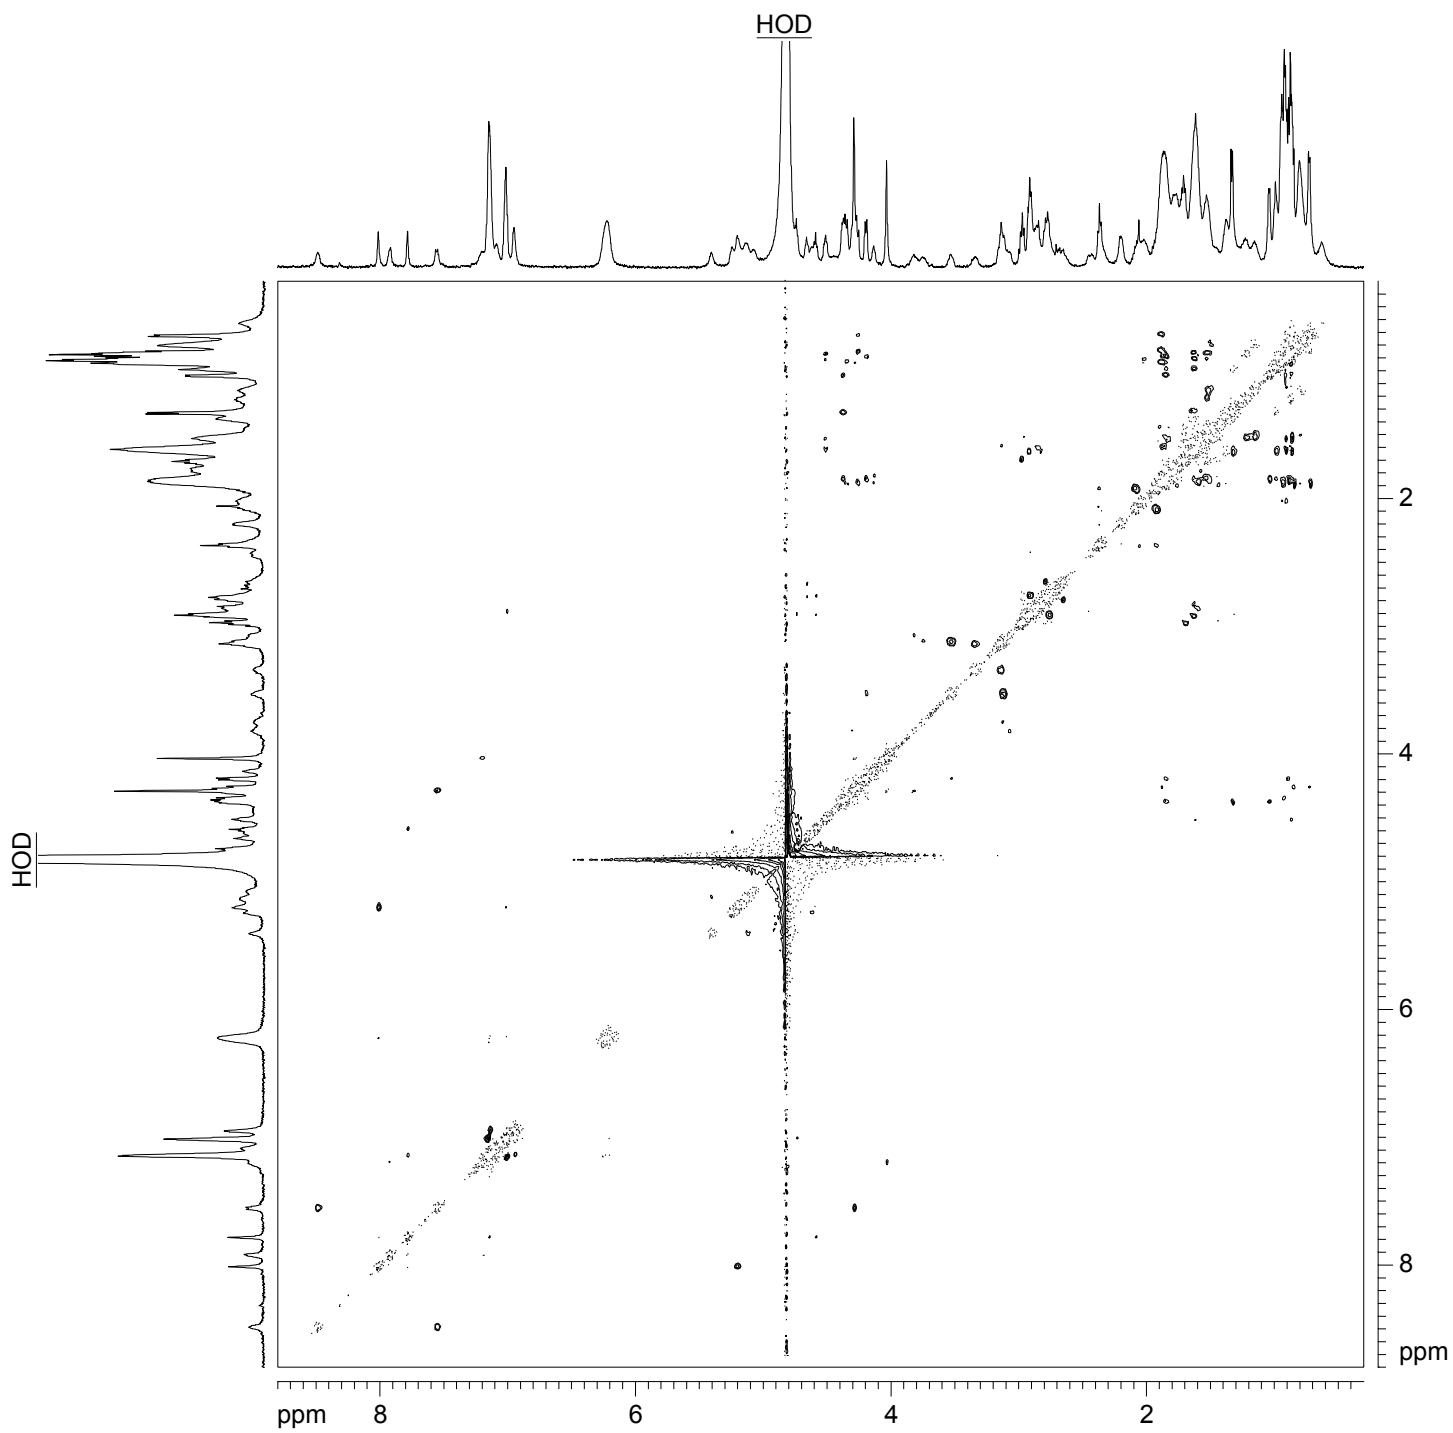



$^1\text{H}$  NMR 2D ROESY of peptide **1a** with presaturation suppression of the HOD peak  
0.15 mM in  $\text{D}_2\text{O}$  at 600 MHz and 293 K with 200-ms spin-lock mixing time

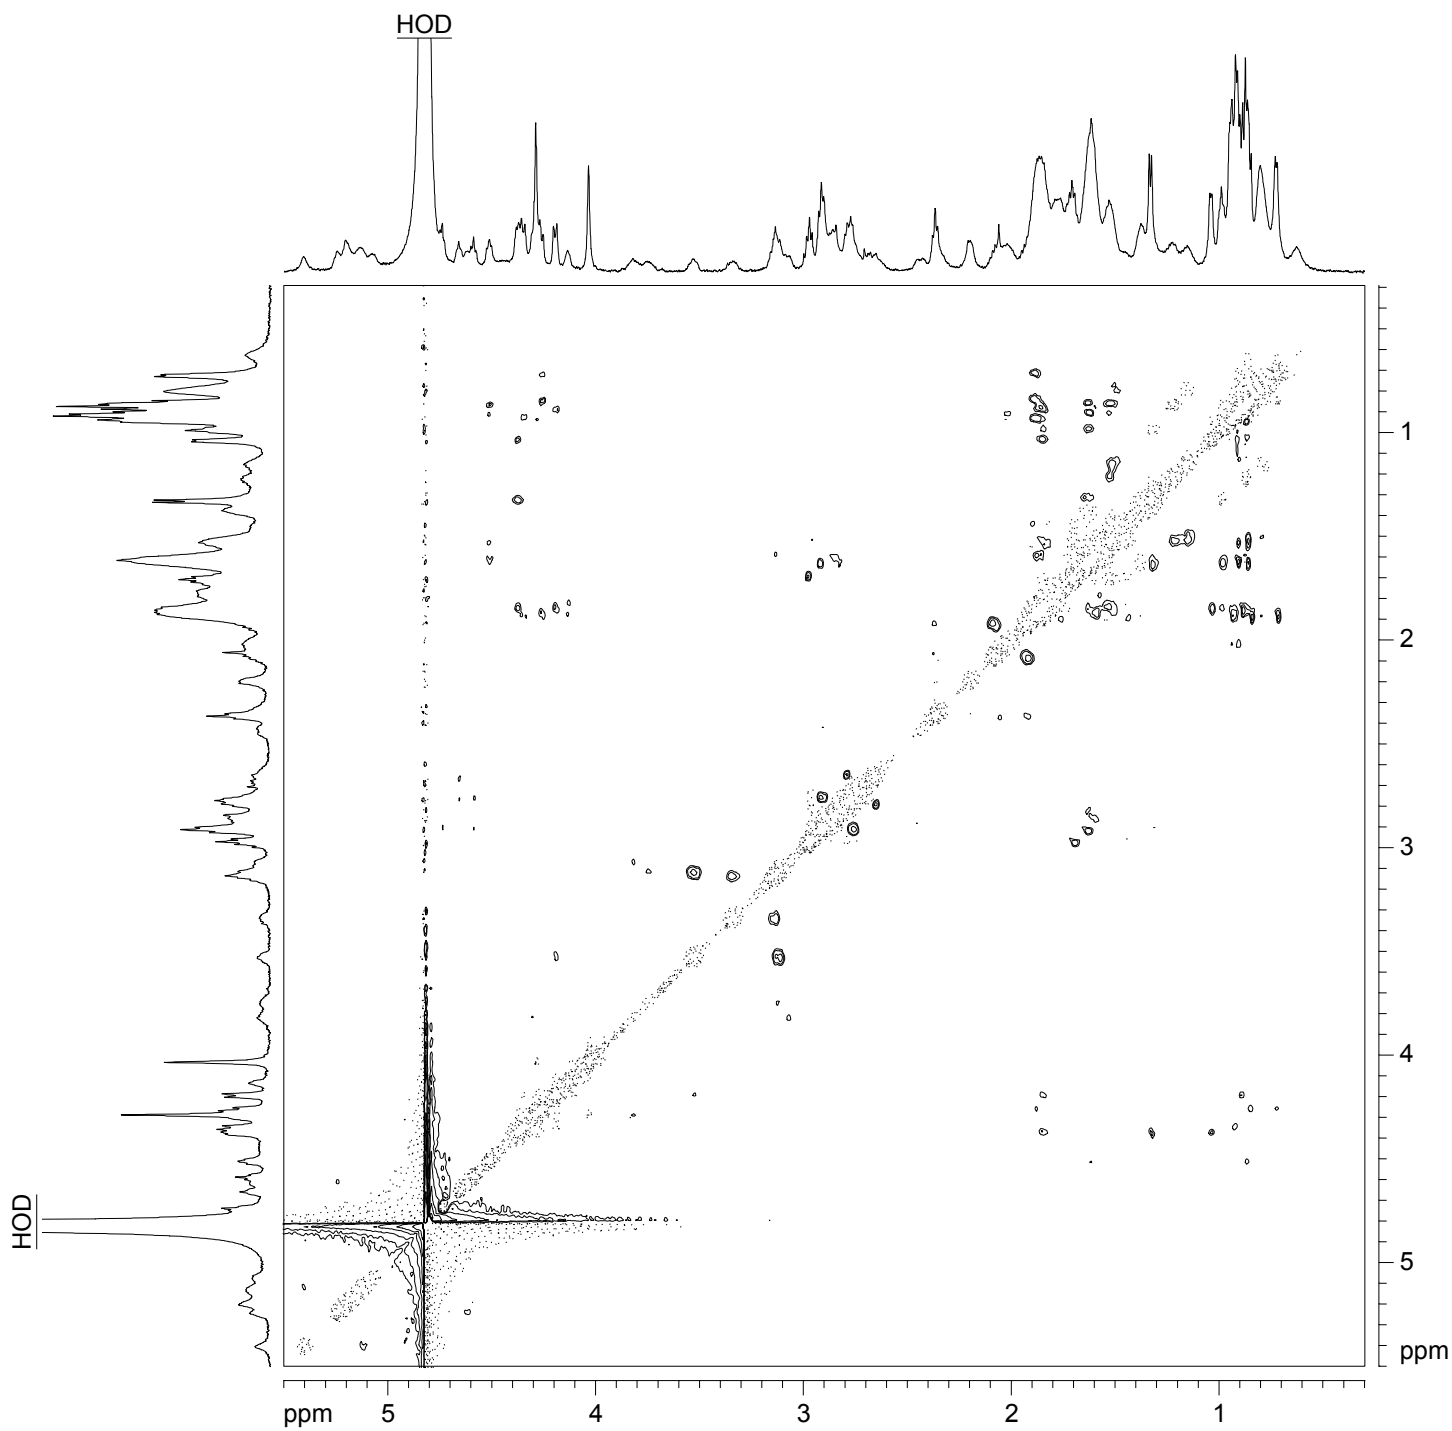

$^1\text{H}$  NMR DOSY of peptide **1a**, 0.15 mM in  $\text{D}_2\text{O}$  at 500 MHz and 298 K

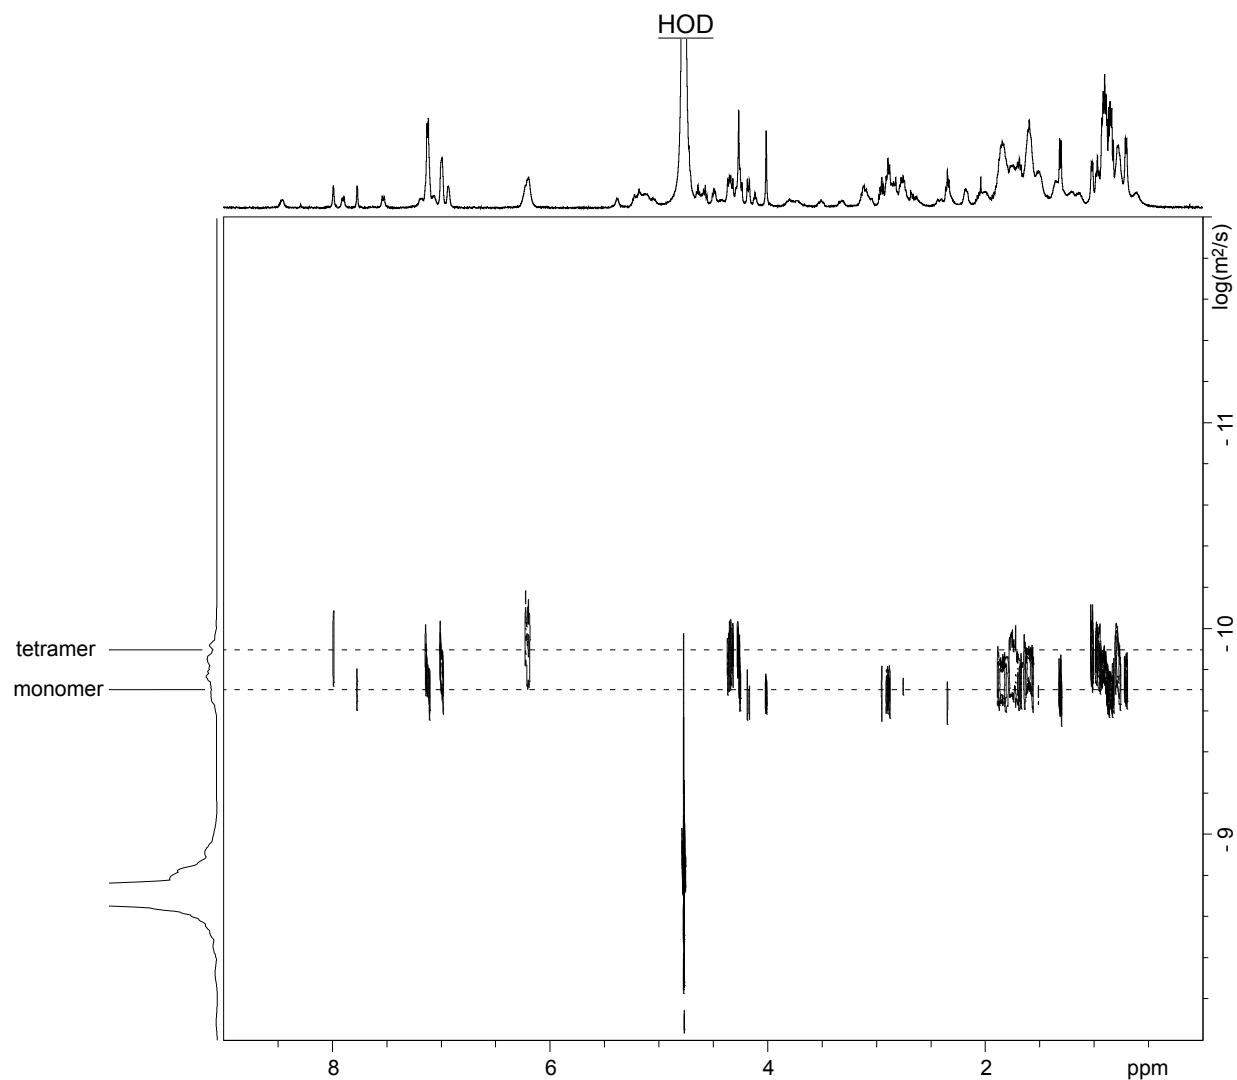

Calculations for peptide **1a** at 0.15 mM

$$D_{\text{HOD}} = 19.0 \times 10^{-10} \text{ m}^2/\text{s} \text{ }^a$$

$$\log(D_{\text{HOD}}) = -8.721$$

$$D_{\text{monomer}}: \log(D) = -9.69; D = 10^{-9.69} = 20.4 \pm 1.7 \times 10^{-11} \text{ m}^2/\text{s}$$

$$D_{\text{tetramer}}: \log(D) = -9.90; D = 10^{-9.90} = 12.6 \pm 1.6 \times 10^{-11} \text{ m}^2/\text{s}$$

<sup>a</sup>Longsworth, L. G. *J. Phys. Chem.* **1960**, *64*, 1914–1917.

**<sup>1</sup>H NMR of peptide 1a, 8 mM in D<sub>2</sub>O at 600 MHz and 298 K**

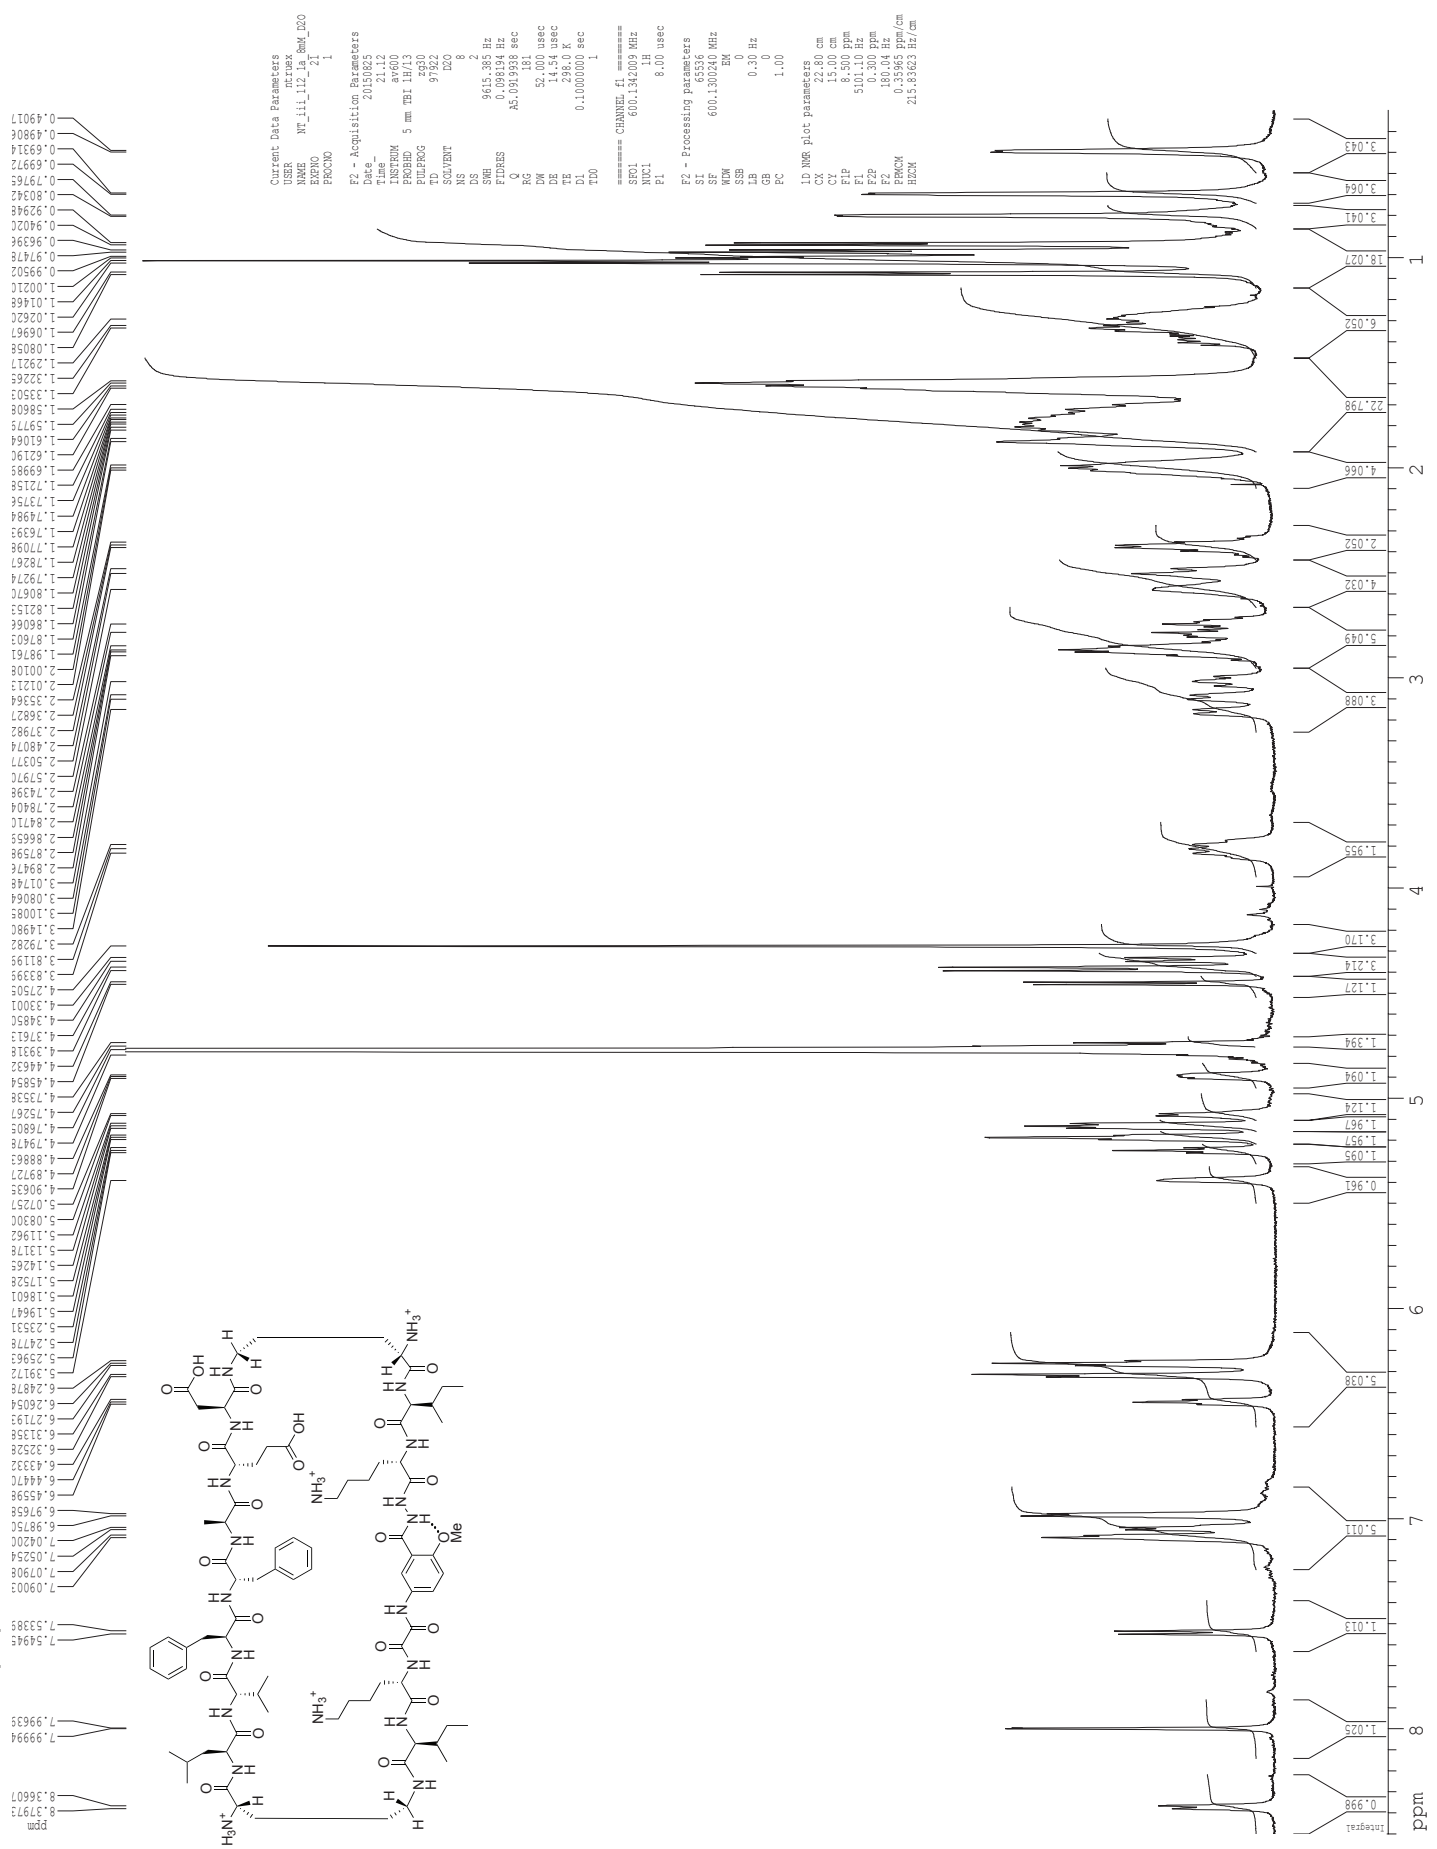

# <sup>1</sup>H NMR of peptide 1a, 8 mM in D<sub>2</sub>O at 600 MHz and 298 K

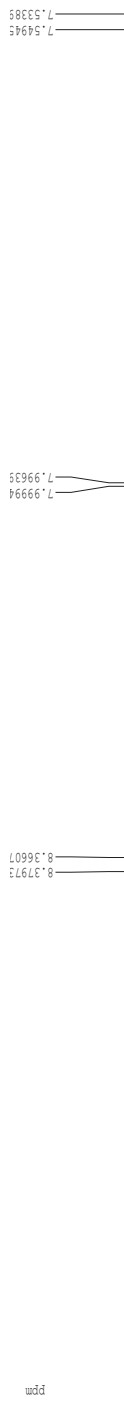

```

Current Data Parameters
Name      WT_111_112_21_8mM_D2O
NMR      WT_111_112_21_8mM_D2O
PROCNO   1
F2 - Acquisition Parameters
Date_    20080722
Time     21:12
INSTRUM  AV400
PROBHD   5 mm TBI.H/13
PULPROG  zg30
TD       97322
SOLVENT  D2O
NS       8
DS       2
SS       2
SMH      9645.385 Hz
FIDRES   0.098194 Hz
AQ       8.091938 sec
RG       52.000 usec
DE       14.54 usec
TE       298.0 K
D1       0.10000000 sec
TD0      1
===== CHANNEL f1 =====
SFO1     600.1342009 MHz
NUC1     1H
P1       8.00 usec
F2 - Processing parameters
SI       65536
SF       600.1300240 MHz
WDW      EM
SSB      0
GB       0
PC       1.00
ID NMR plot parameters
CX       22.80 cm
CY       15.00 cm
CZ       8.000 cm
EI       5341.16 Hz
F1       7.200 ppm
F2       4320.94 Hz
FREQM    0.07456 ppm/cm
SFOF     441.4653 Hz/cm
  
```

# 1H NMR of peptide 1a, 8 mM in D2O at 600 MHz and 298 K

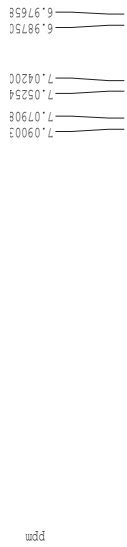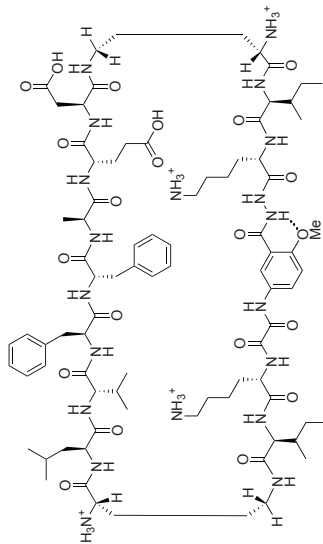

```

Current Data Parameters
Name: 1a
NAME: WT_111_112_21_8mM_D2O
EXPNO: 1
PROCNO: 1
F2 - Acquisition Parameters
Date_UTC: 20080722
Time: 21:12
INSTRUM: spect
PROBHD: 5 mm TBI LH/13
PULPROG: zgpg30
TD: 65536
SOLVENT: D2O
NS: 8
DS: 2
SWH: 9615.385 Hz
FIDRES: 0.098194 Hz
AQ: 8.091938 sec
RG: 327.5
DM: 52.000 usec
DE: 14.54 usec
TE: 298.0 K
D1: 0.10000000 sec
TD0: 1
===== CHANNEL f1 =====
SFO1: 600.1342009 MHz
NUC1: 1H
P1: 8.00 usec
F2 - Processing parameters
SI: 65536
SF: 600.1300240 MHz
WDW: EM
SSB: 0
LB: 0.50 Hz
GB: 0
PC: 1.00
ID NMR plot parameters
CX: 22.80 cm
CY: 15.00 cm
CZ: 15.00 cm
ELP: 7.500 cm
F1: 4500.968 Hz
F2: 5.800 ppm
F3: 3480.75 Hz
RGROW: 0.107456 ppm/cm
RGCOR: 44.74653 Hz/cm
  
```

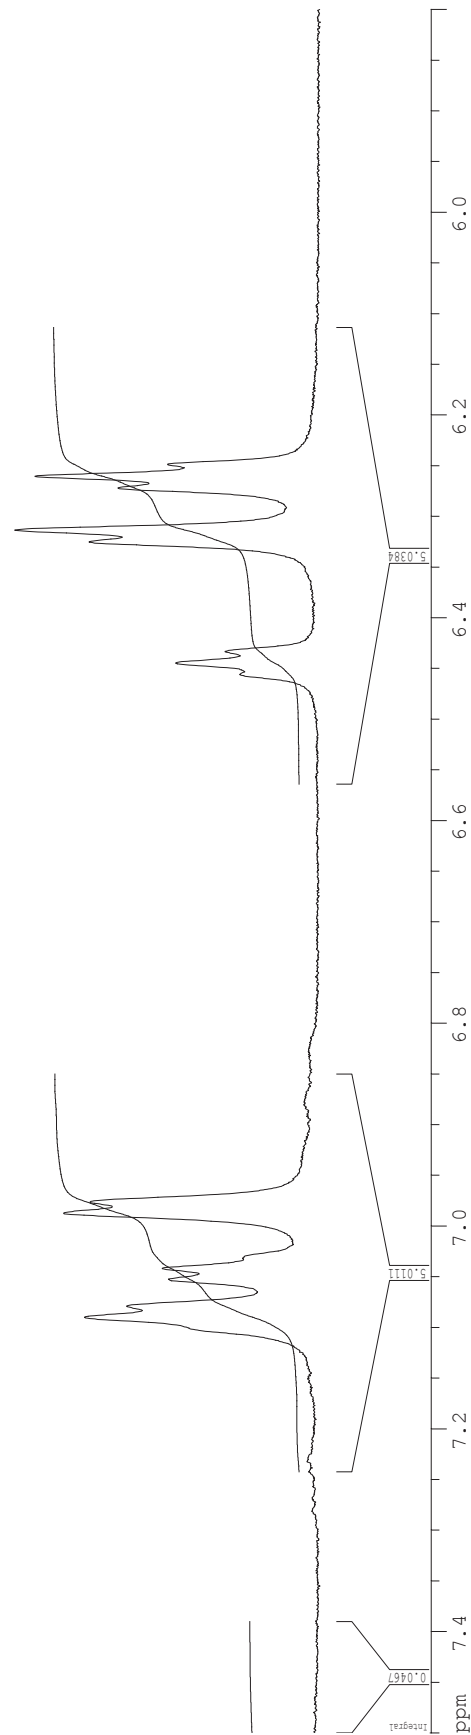

# 1H NMR of peptide 1a, 8 mM in D2O at 600 MHz and 298 K

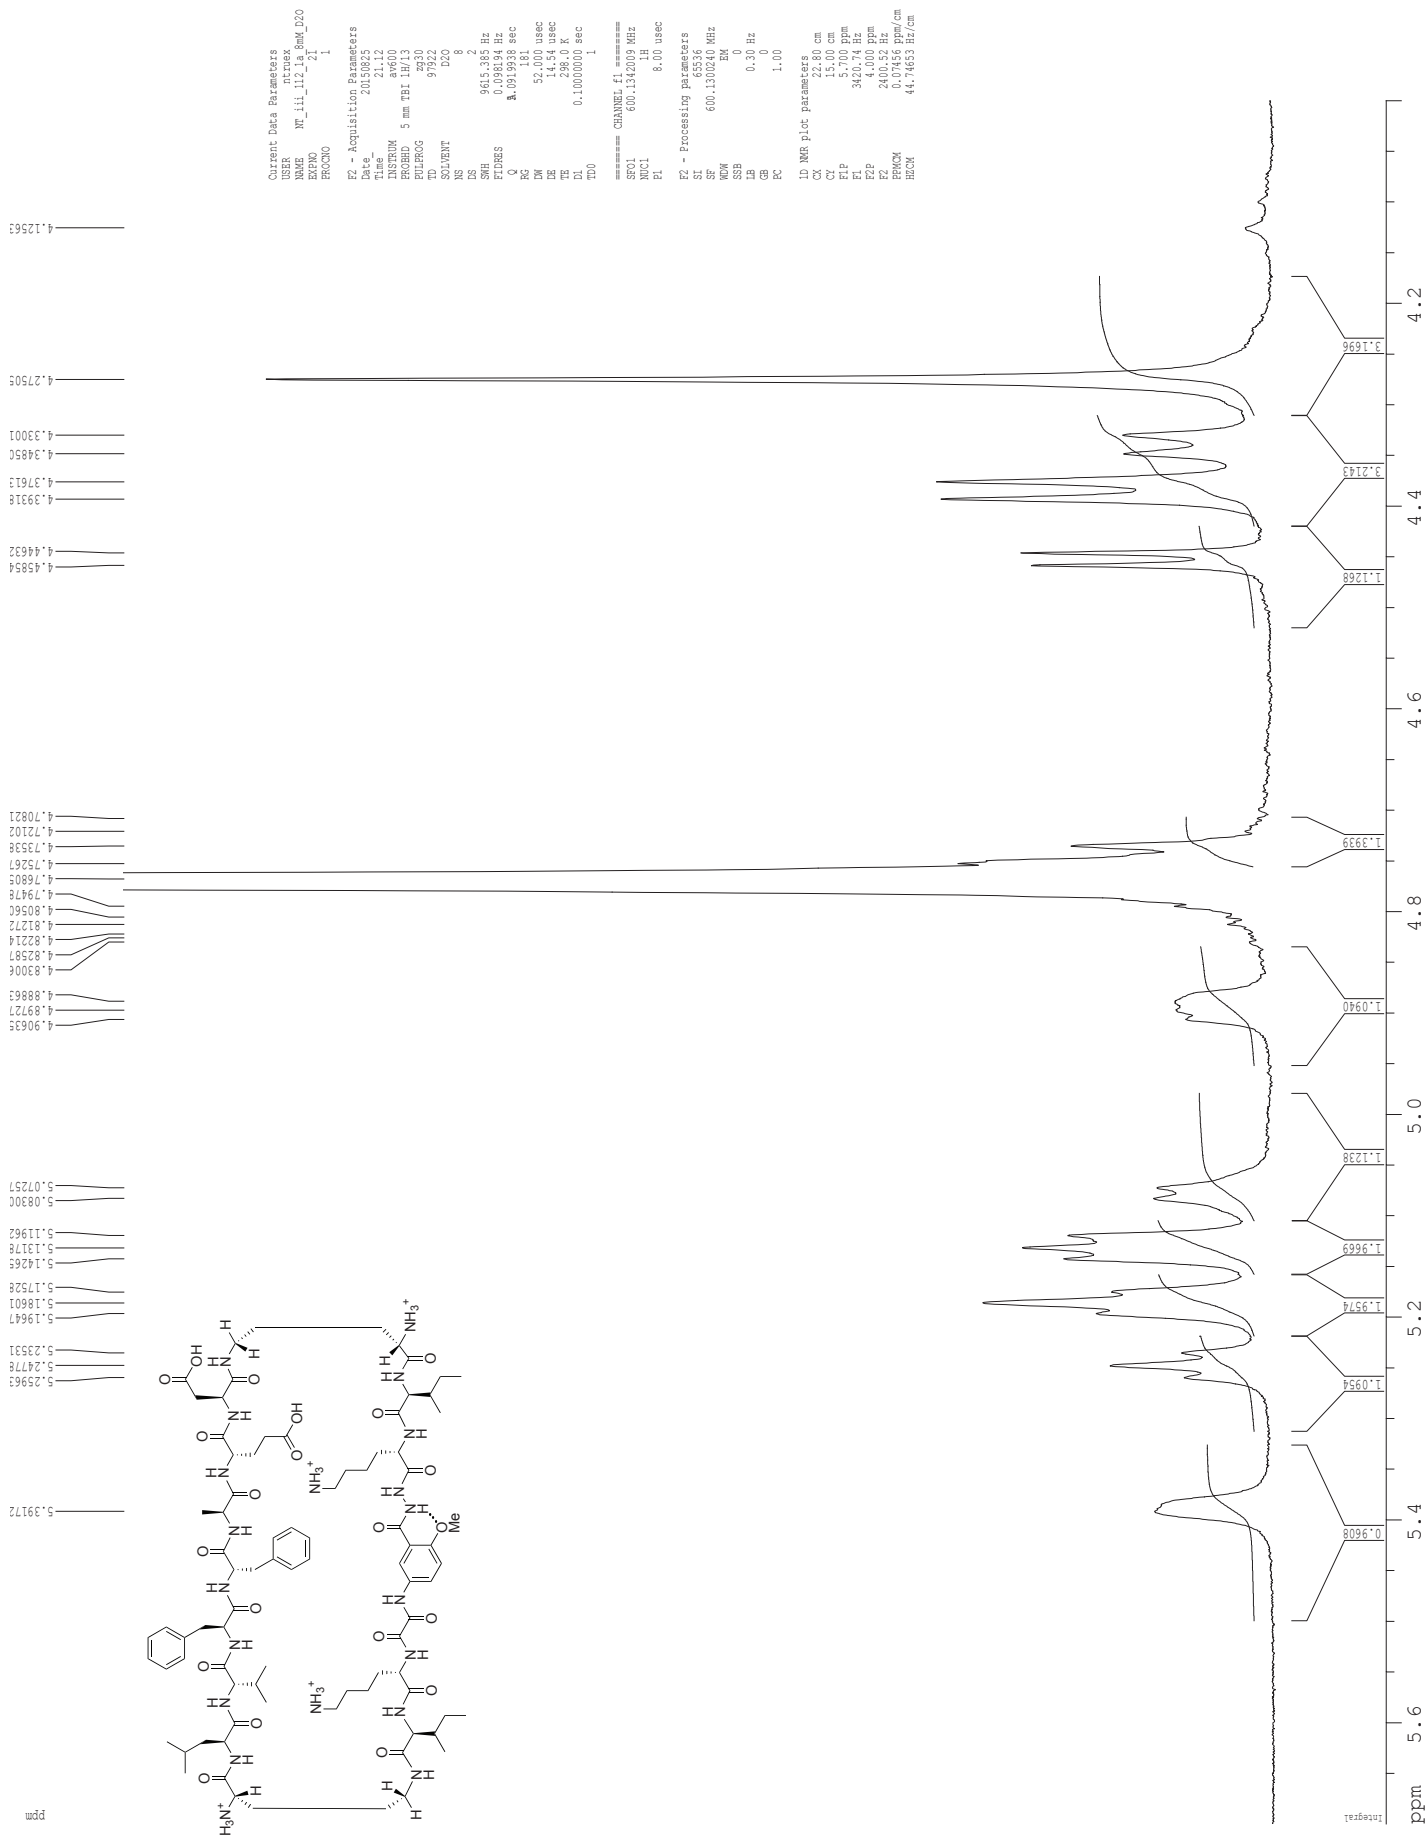

# <sup>1</sup>H NMR of peptide 1a, 8 mM in D<sub>2</sub>O at 600 MHz and 298 K

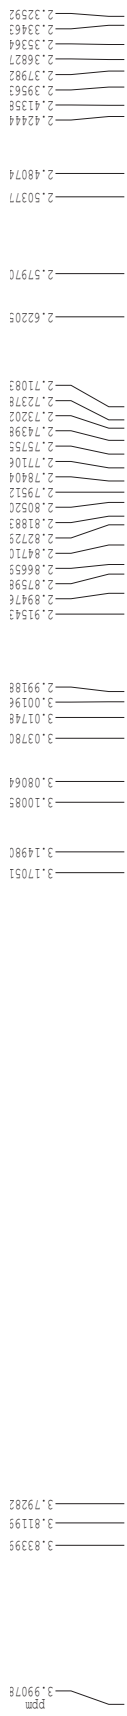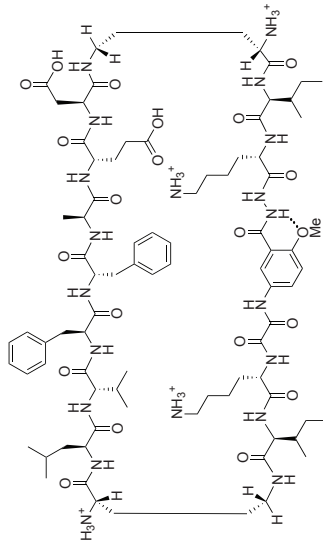

Current Data Parameters  
 Name: WT\_III\_112\_21\_8mM\_D2O  
 Name: WT\_III\_112\_21\_8mM\_D2O  
 EXPNO: 1  
 PROCNO: 1  
 F2 - Acquisition Parameters  
 Date\_UTC: 20100722  
 Time: 12:12  
 INSTRUM: spect  
 PROCMD: 5 mm TBI.H/13  
 PULPROG: zgpg30  
 TD: 65536  
 SFO1: 600.130040 MHz  
 FREQ1: 600.130040 MHz  
 CHANNEL: f1  
 NUC1: 1H  
 P1: 8.00 usec  
 F2 - Processing parameters  
 SI: 65536  
 SF: 600.130040 MHz  
 WDW: EM  
 SSB: 0  
 LB: 0.30 Hz  
 GB: 0  
 PC: 1.00  
 ID NMR plot parameters  
 CX: 22.80 cm  
 CY: 15.00 cm  
 CZ: 4.00 cm  
 FI: 4.00000000  
 FIDRES: 24000.52 Hz  
 AQ: 2.30000000 ppm  
 F2: 2.30000000 Hz  
 F3: 13801.30 Hz  
 F4: 0.07456000 ppm/cm  
 BEPACH: 44.74634 Hz/cm  
 BECCH: 44.74634 Hz/cm

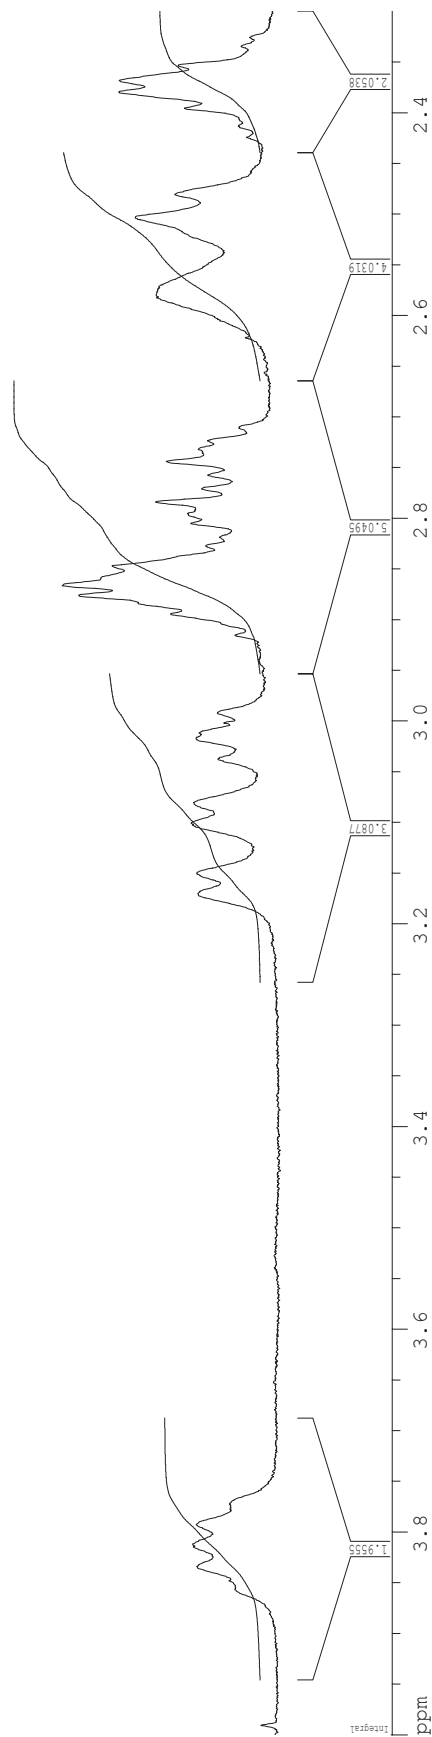

# <sup>1</sup>H NMR of peptide 1a, 8 mM in D<sub>2</sub>O at 600 MHz and 298 K

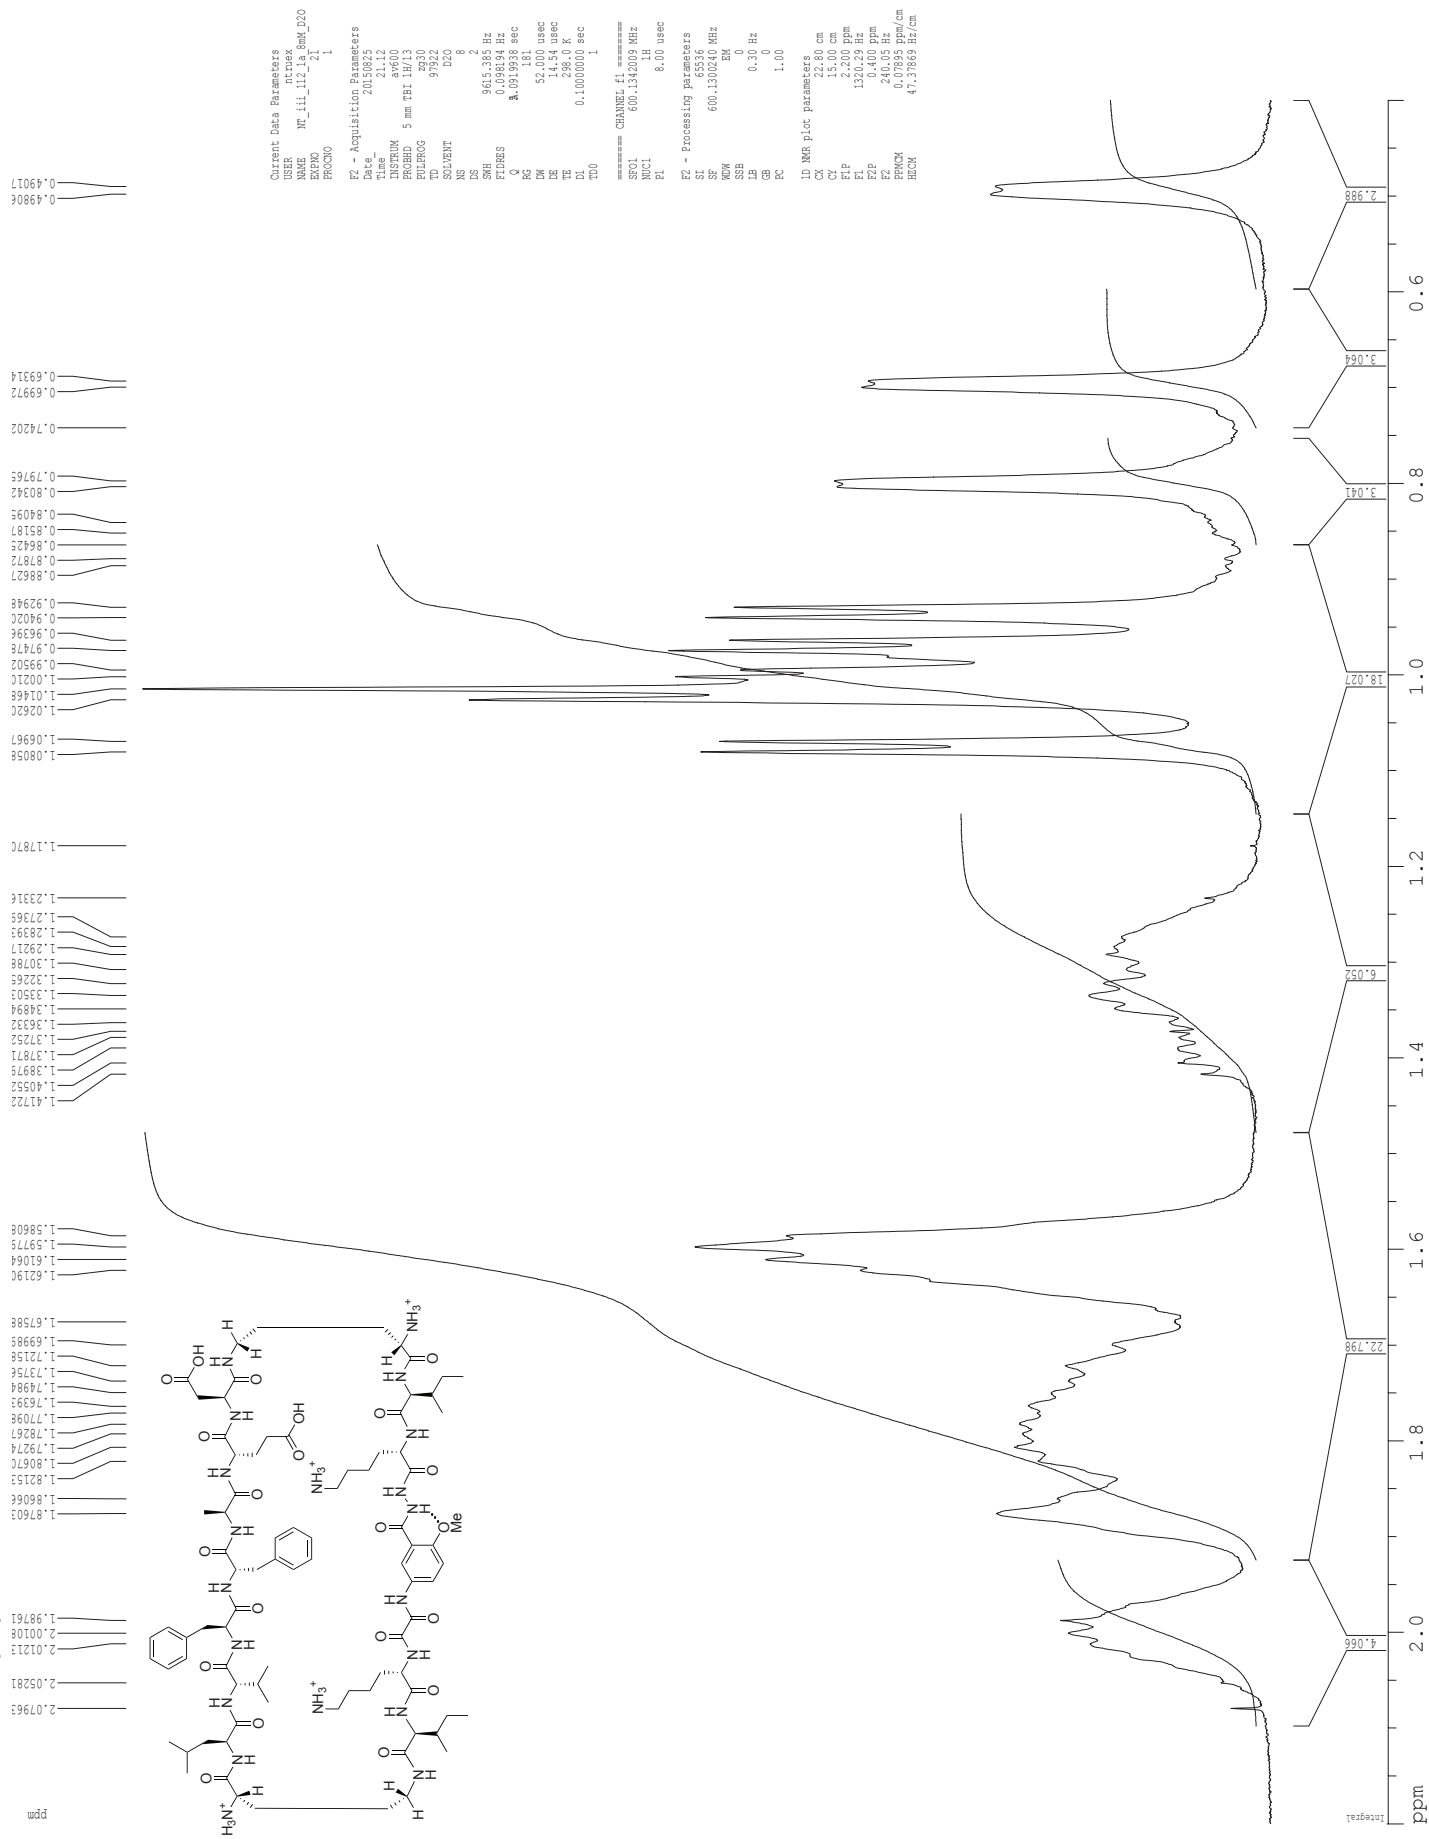



<sup>1</sup>H NMR 2D TOCSY of peptide **1a** with presaturation suppression of the HOD peak  
8 mM in D<sub>2</sub>O at 600 MHz and 298 K with 150-ms spin-lock mixing time

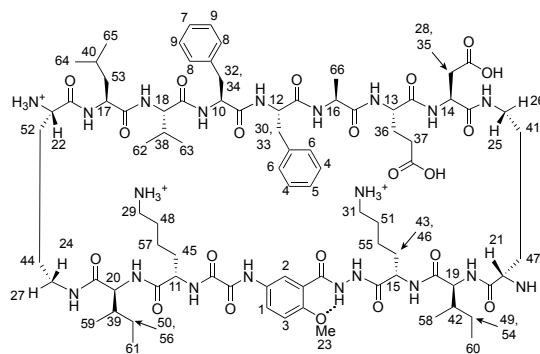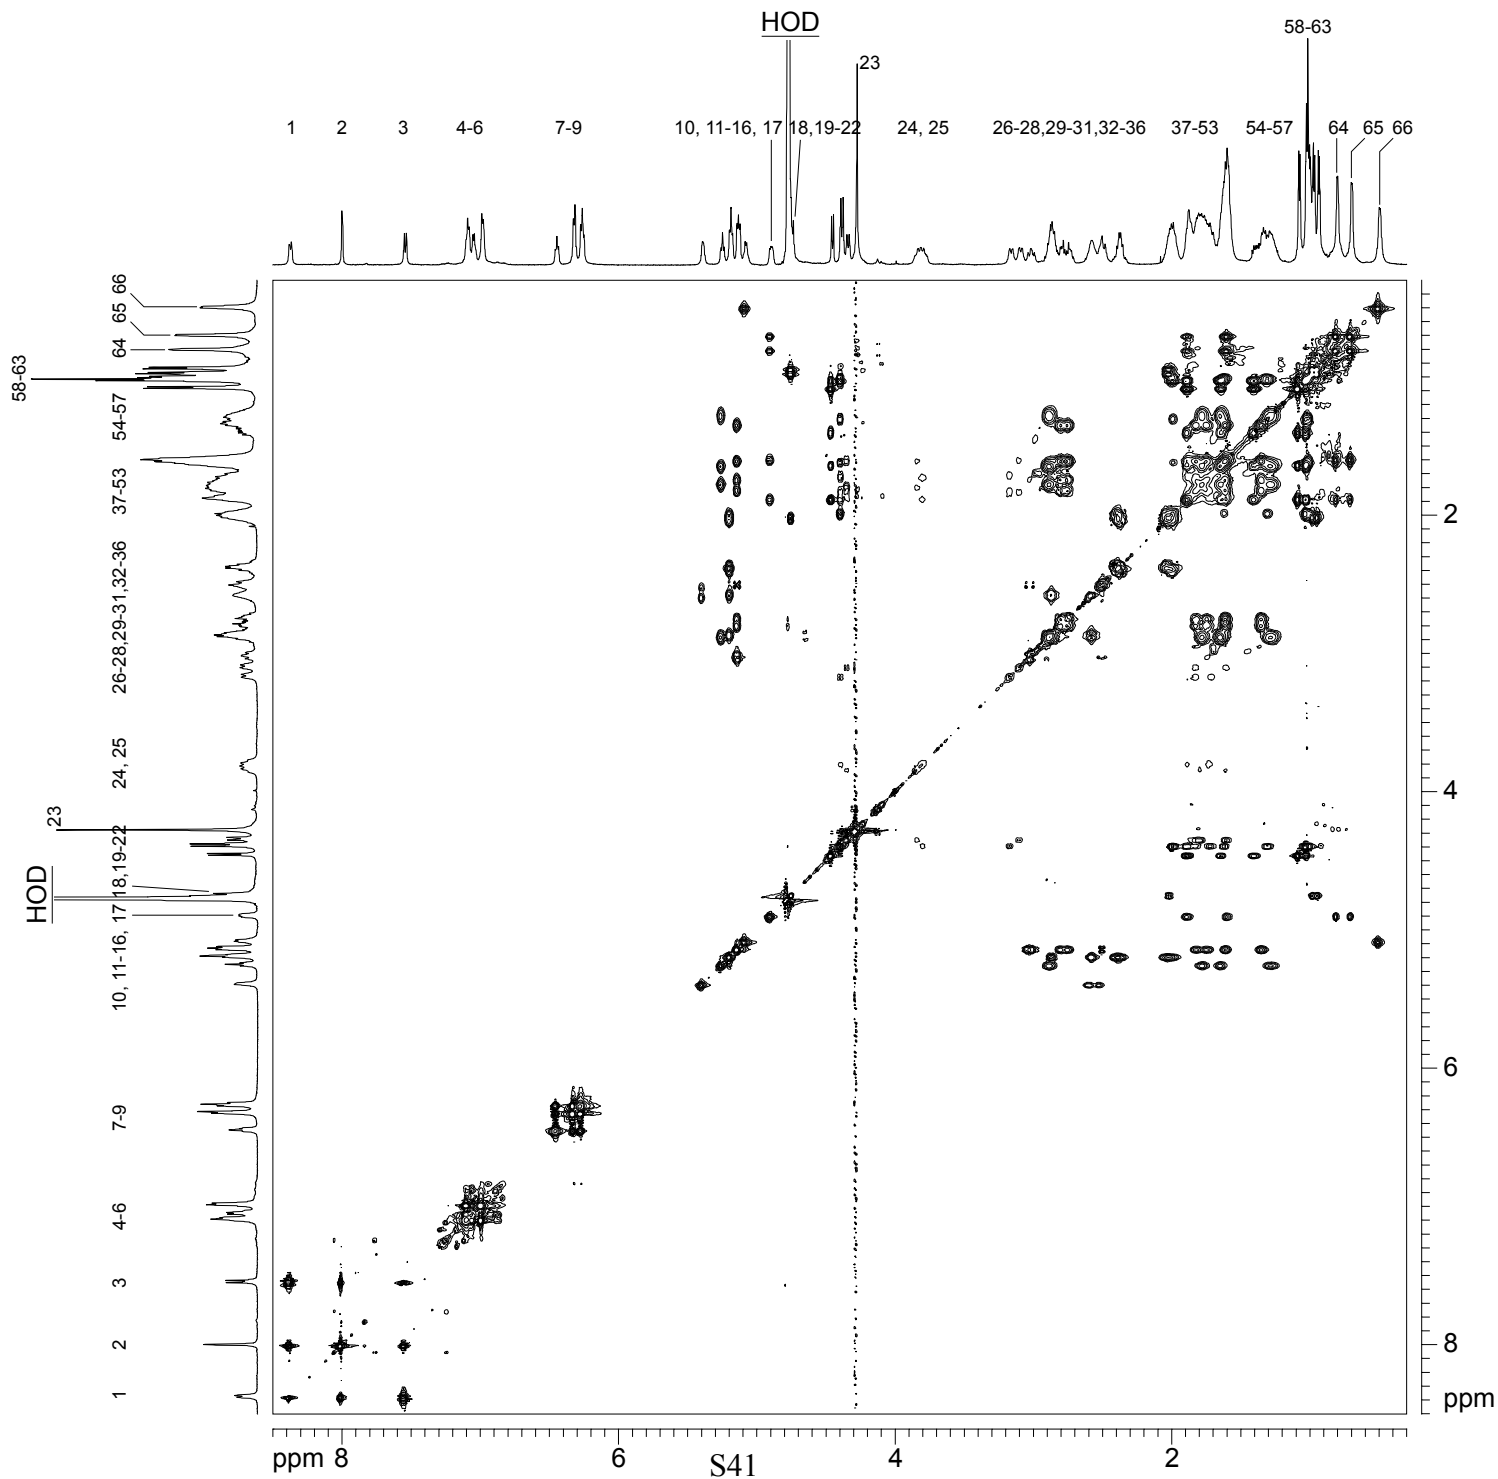

<sup>1</sup>H NMR 2D TOCSY of peptide **1a** with presaturation suppression of the HOD peak  
8 mM in D<sub>2</sub>O at 600 MHz and 298 K with 150-ms spin-lock mixing time

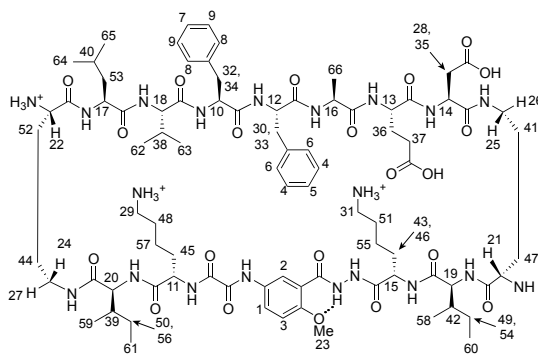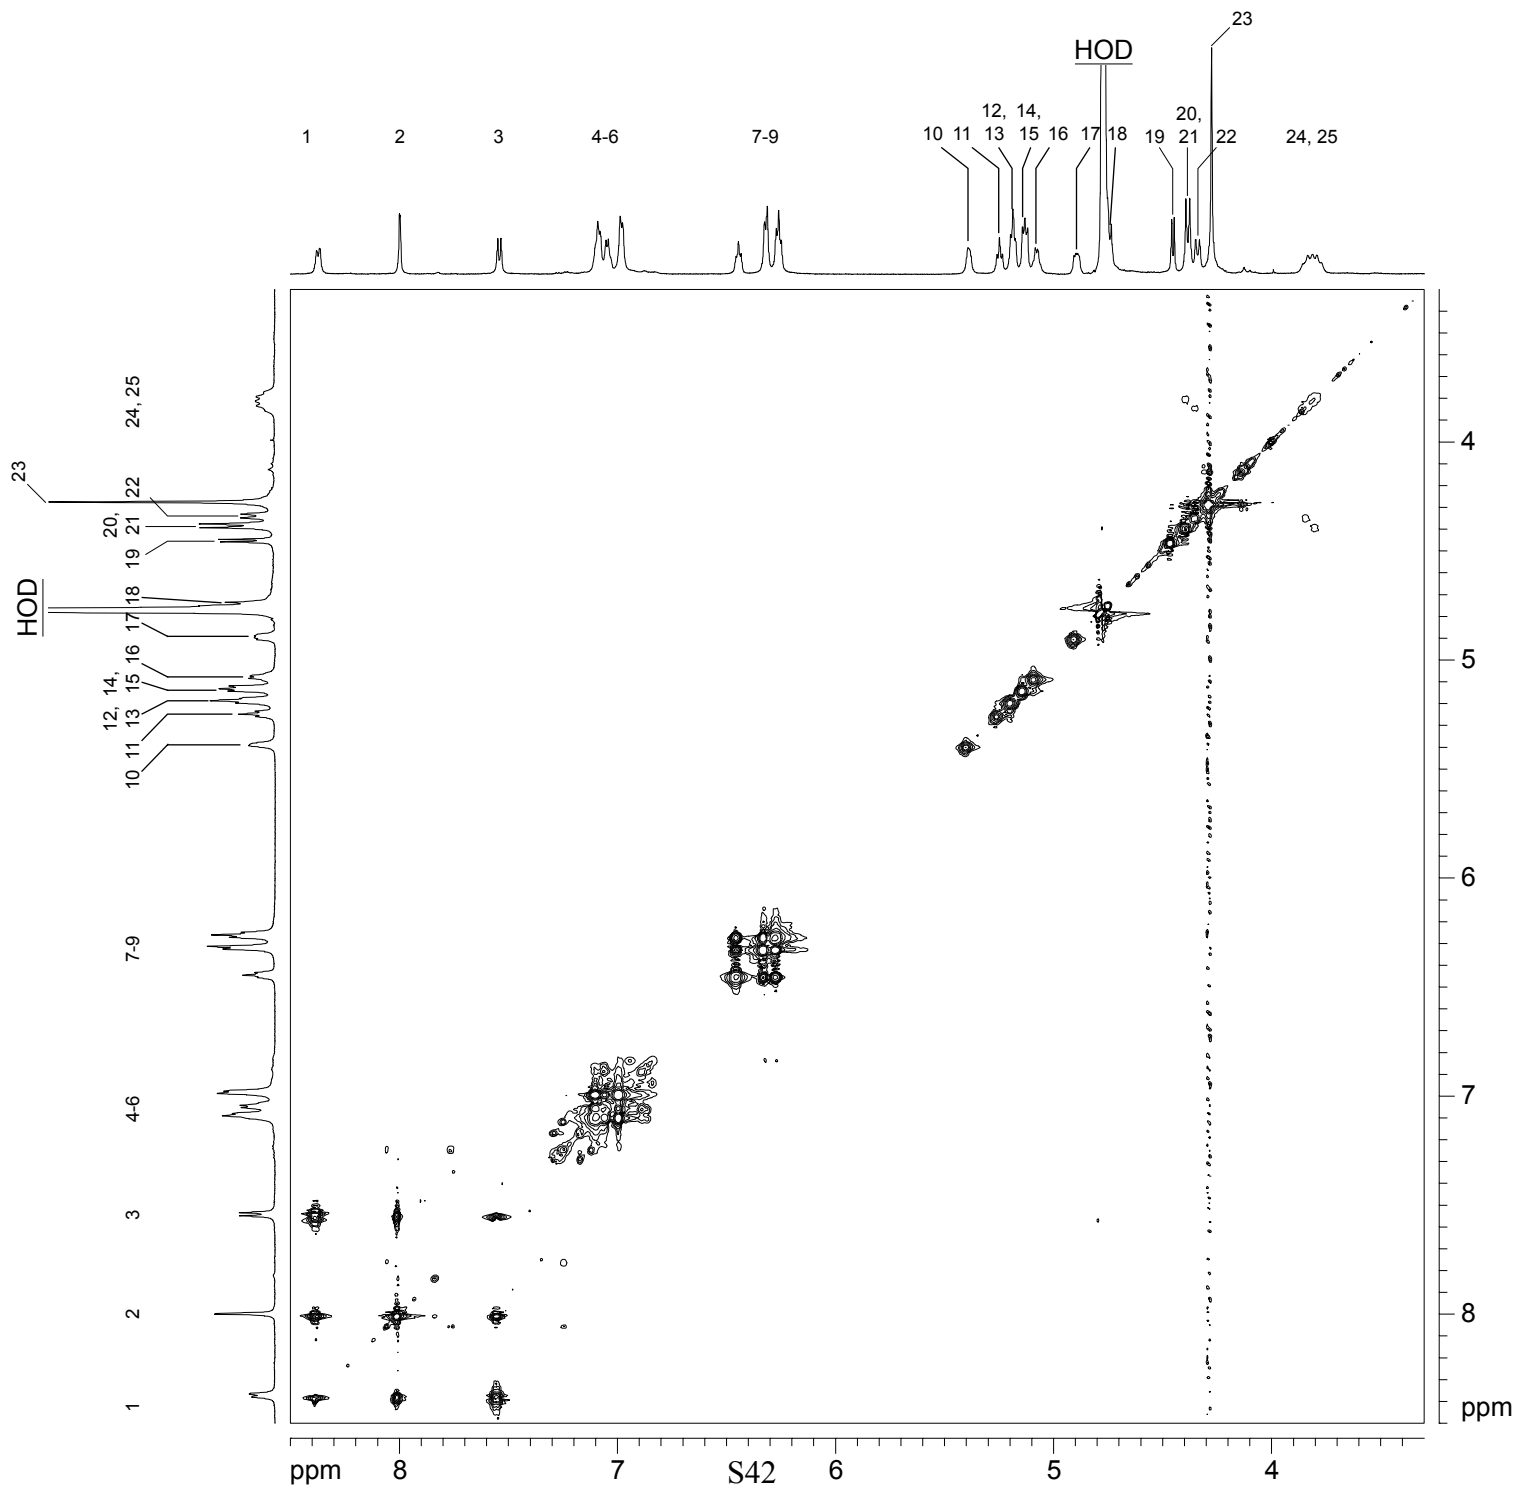

<sup>1</sup>H NMR 2D TOCSY of peptide **1a** with presaturation suppression of the HOD peak  
8 mM in D<sub>2</sub>O at 600 MHz and 298 K with 150-ms spin-lock mixing time

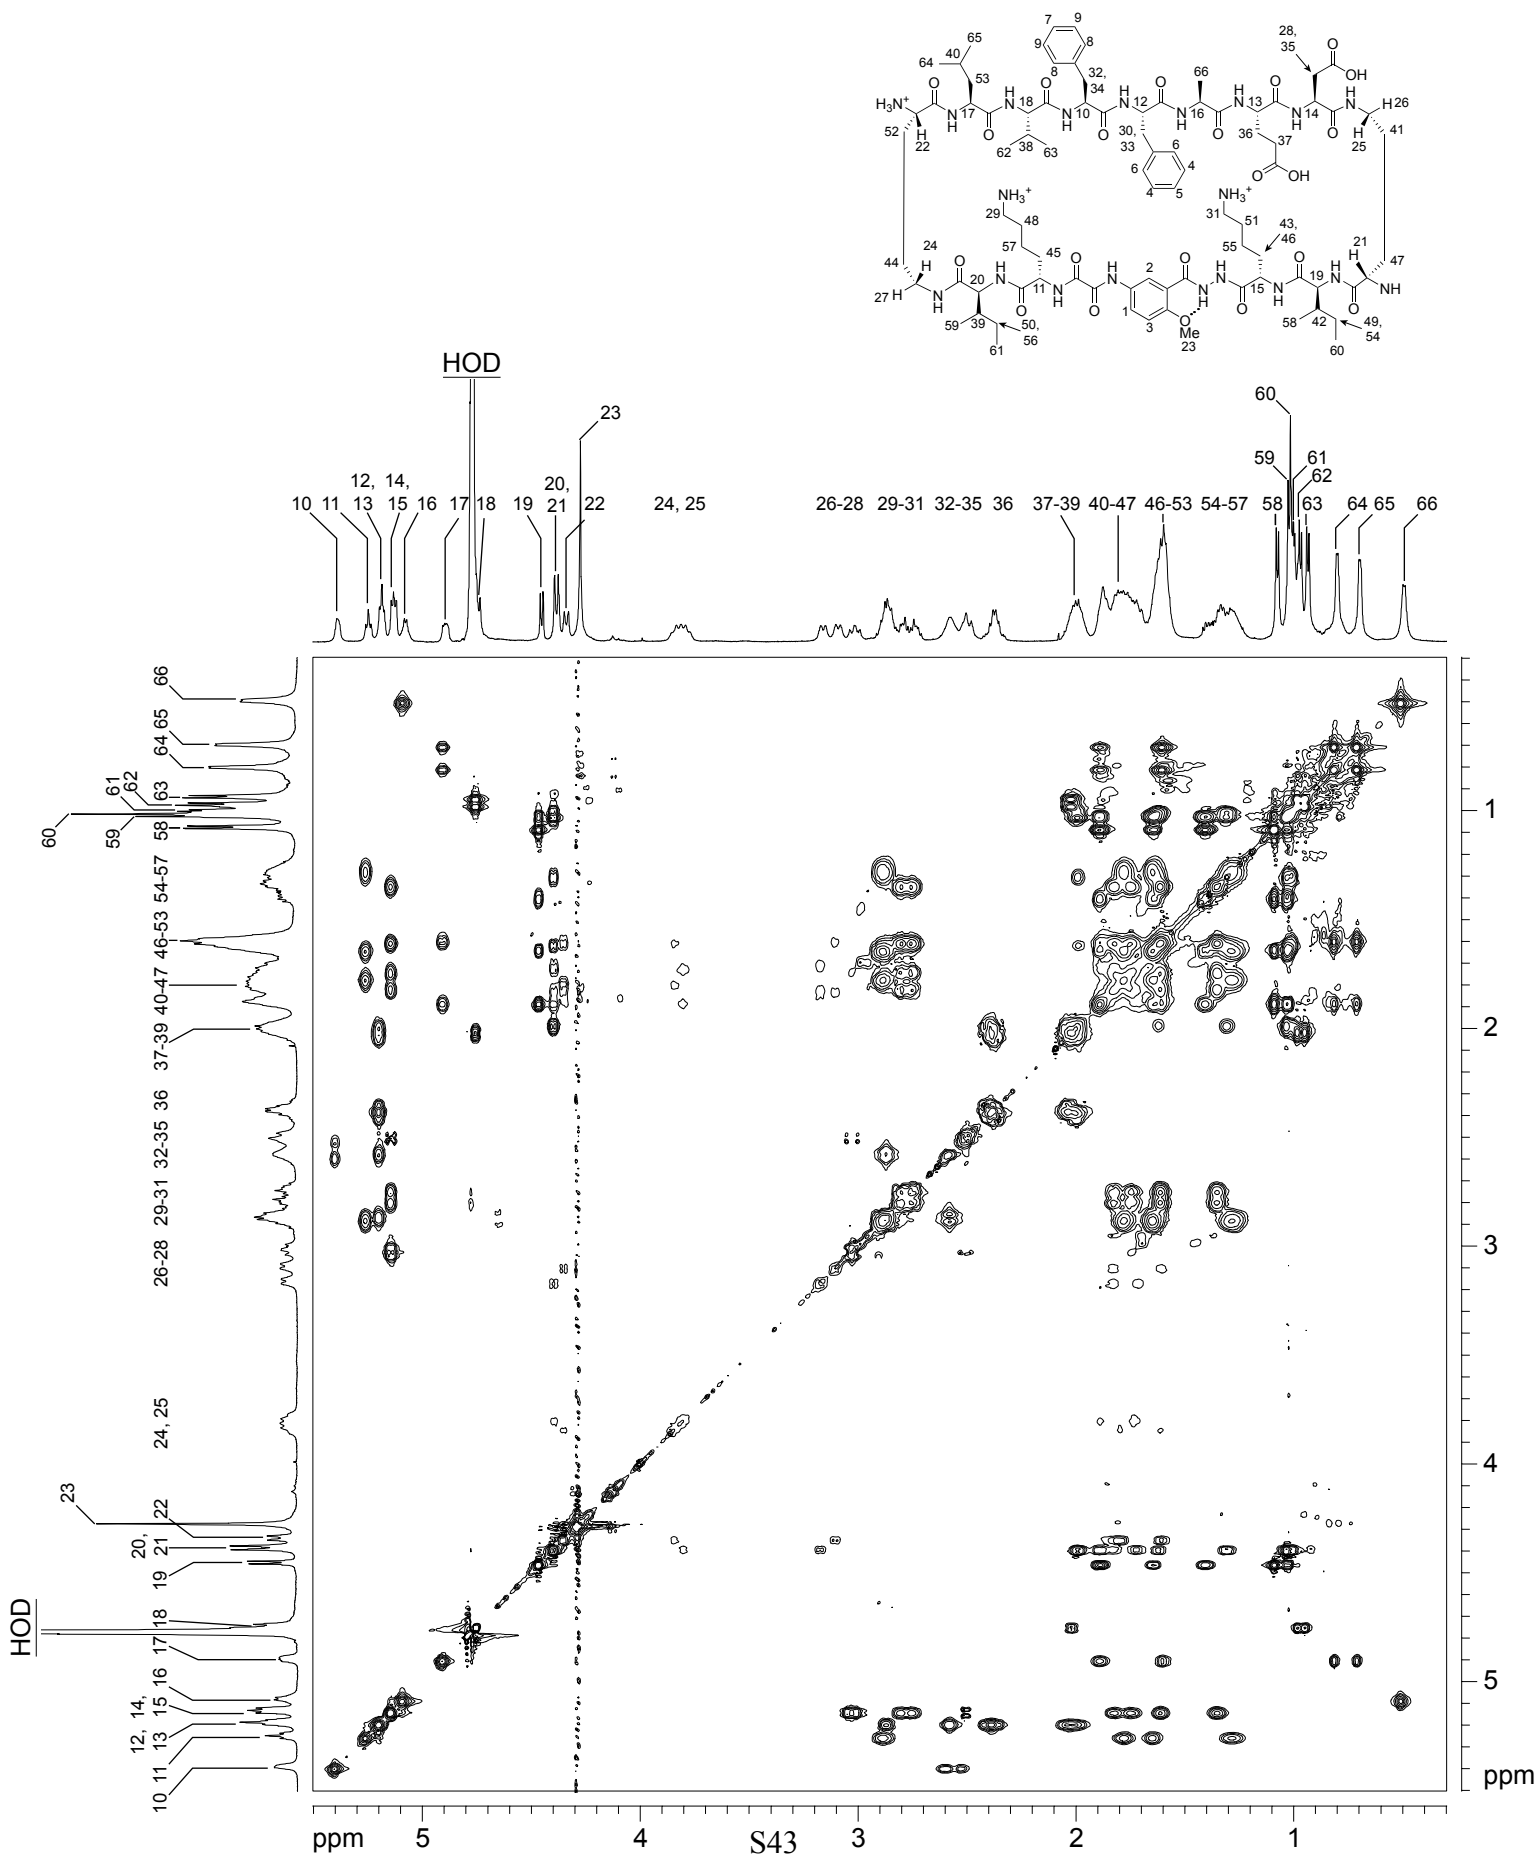

<sup>1</sup>H NMR 2D NOESY of peptide **1a** with presaturation suppression of the HOD peak  
8 mM in D<sub>2</sub>O at 600 MHz and 298 K with 150-ms mixing time

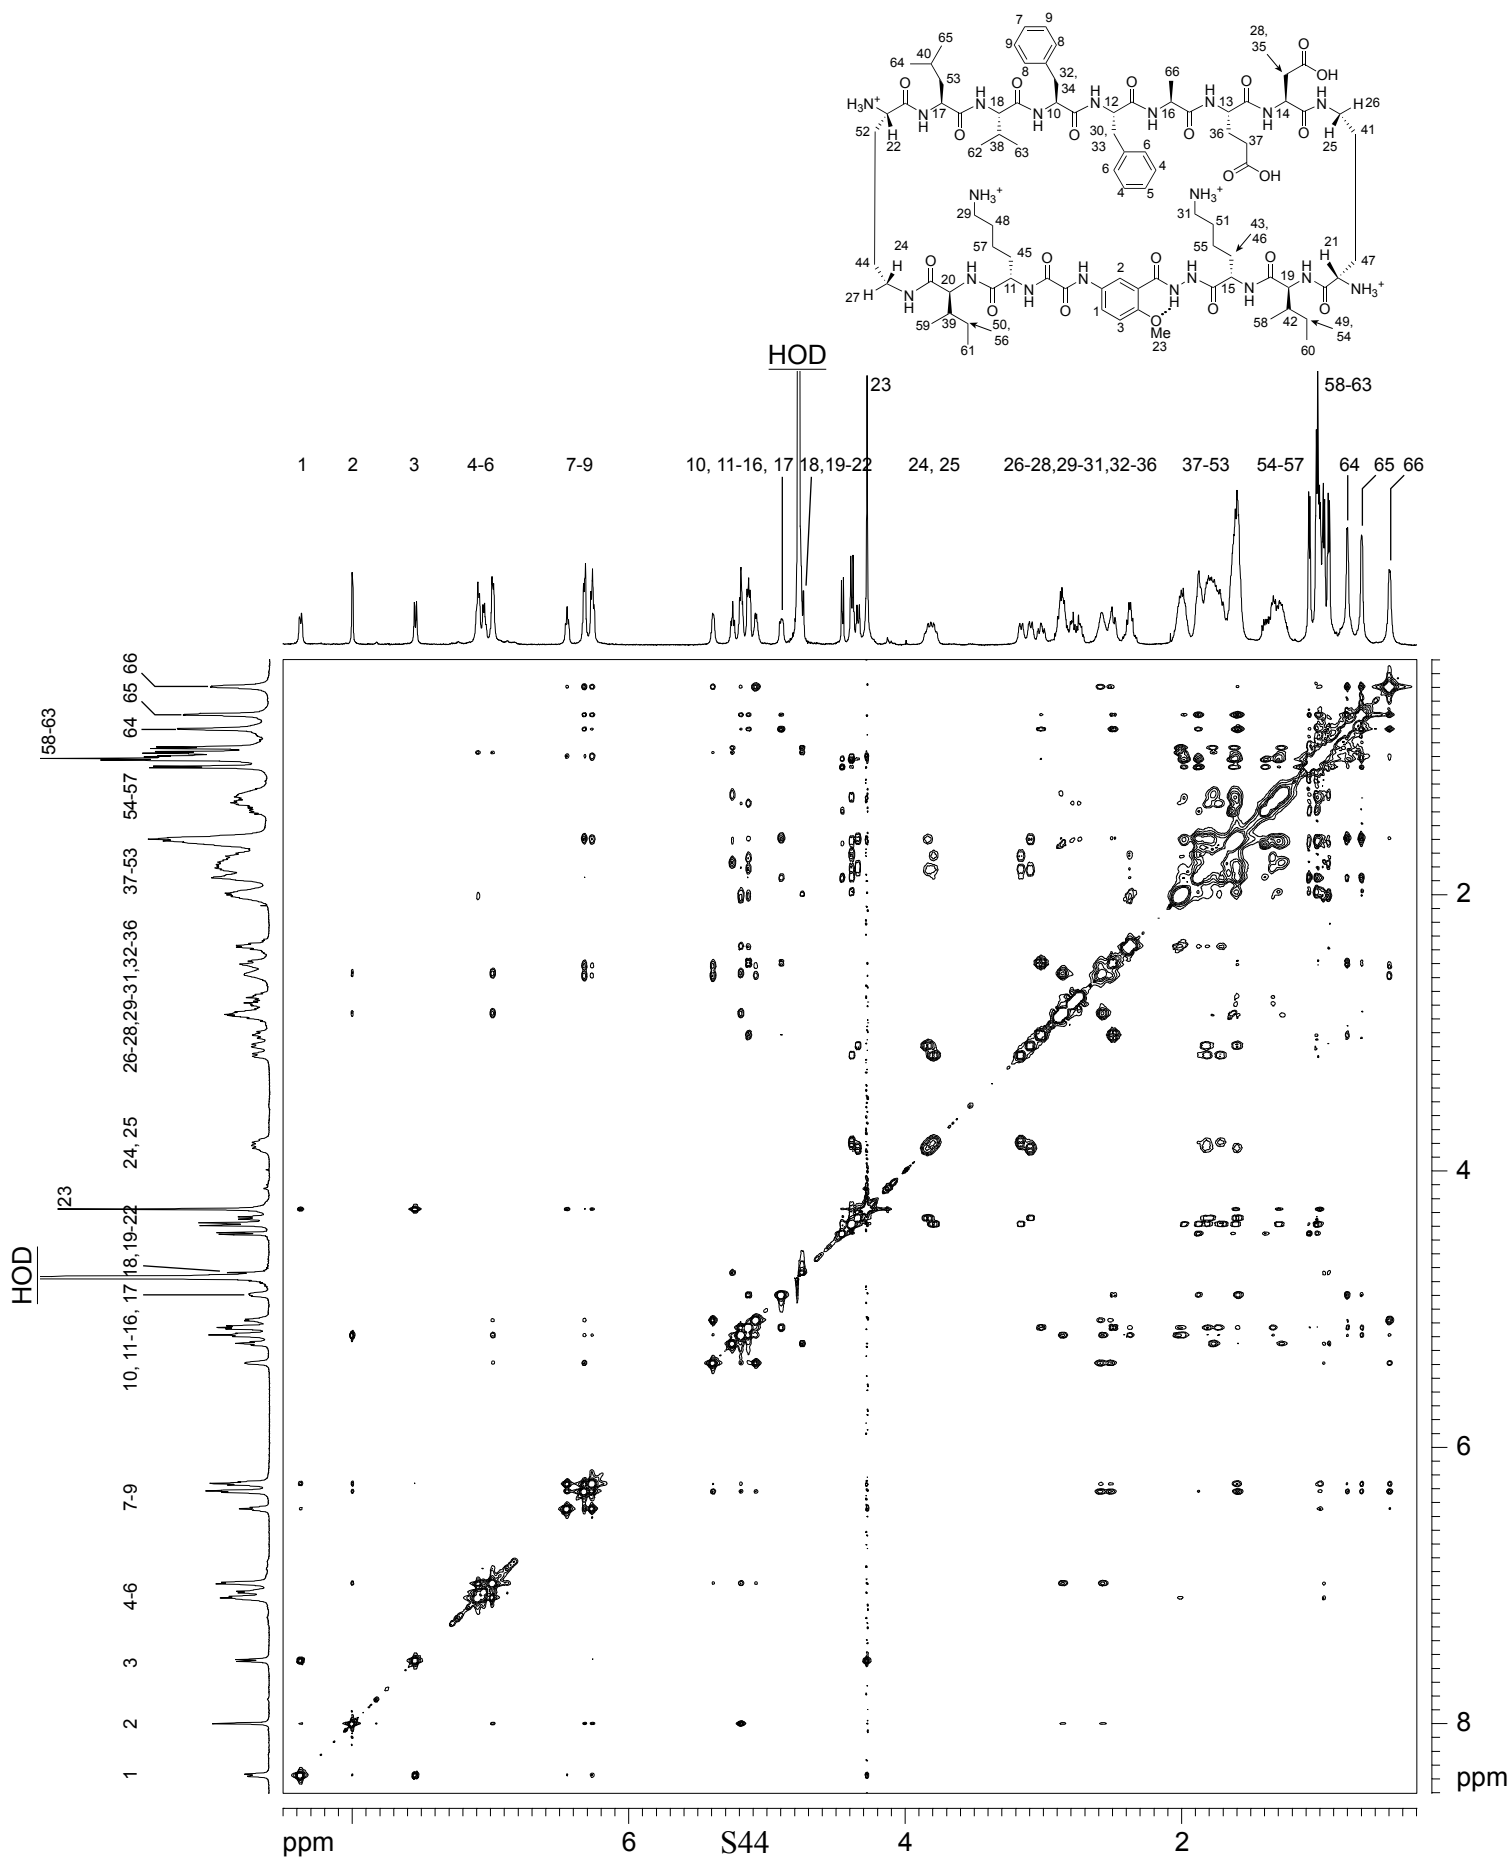

$^1\text{H}$  NMR 2D NOESY of peptide **1a** with presaturation suppression of the HOD peak  
8 mM in  $\text{D}_2\text{O}$  at 600 MHz and 298 K with 150-ms mixing time

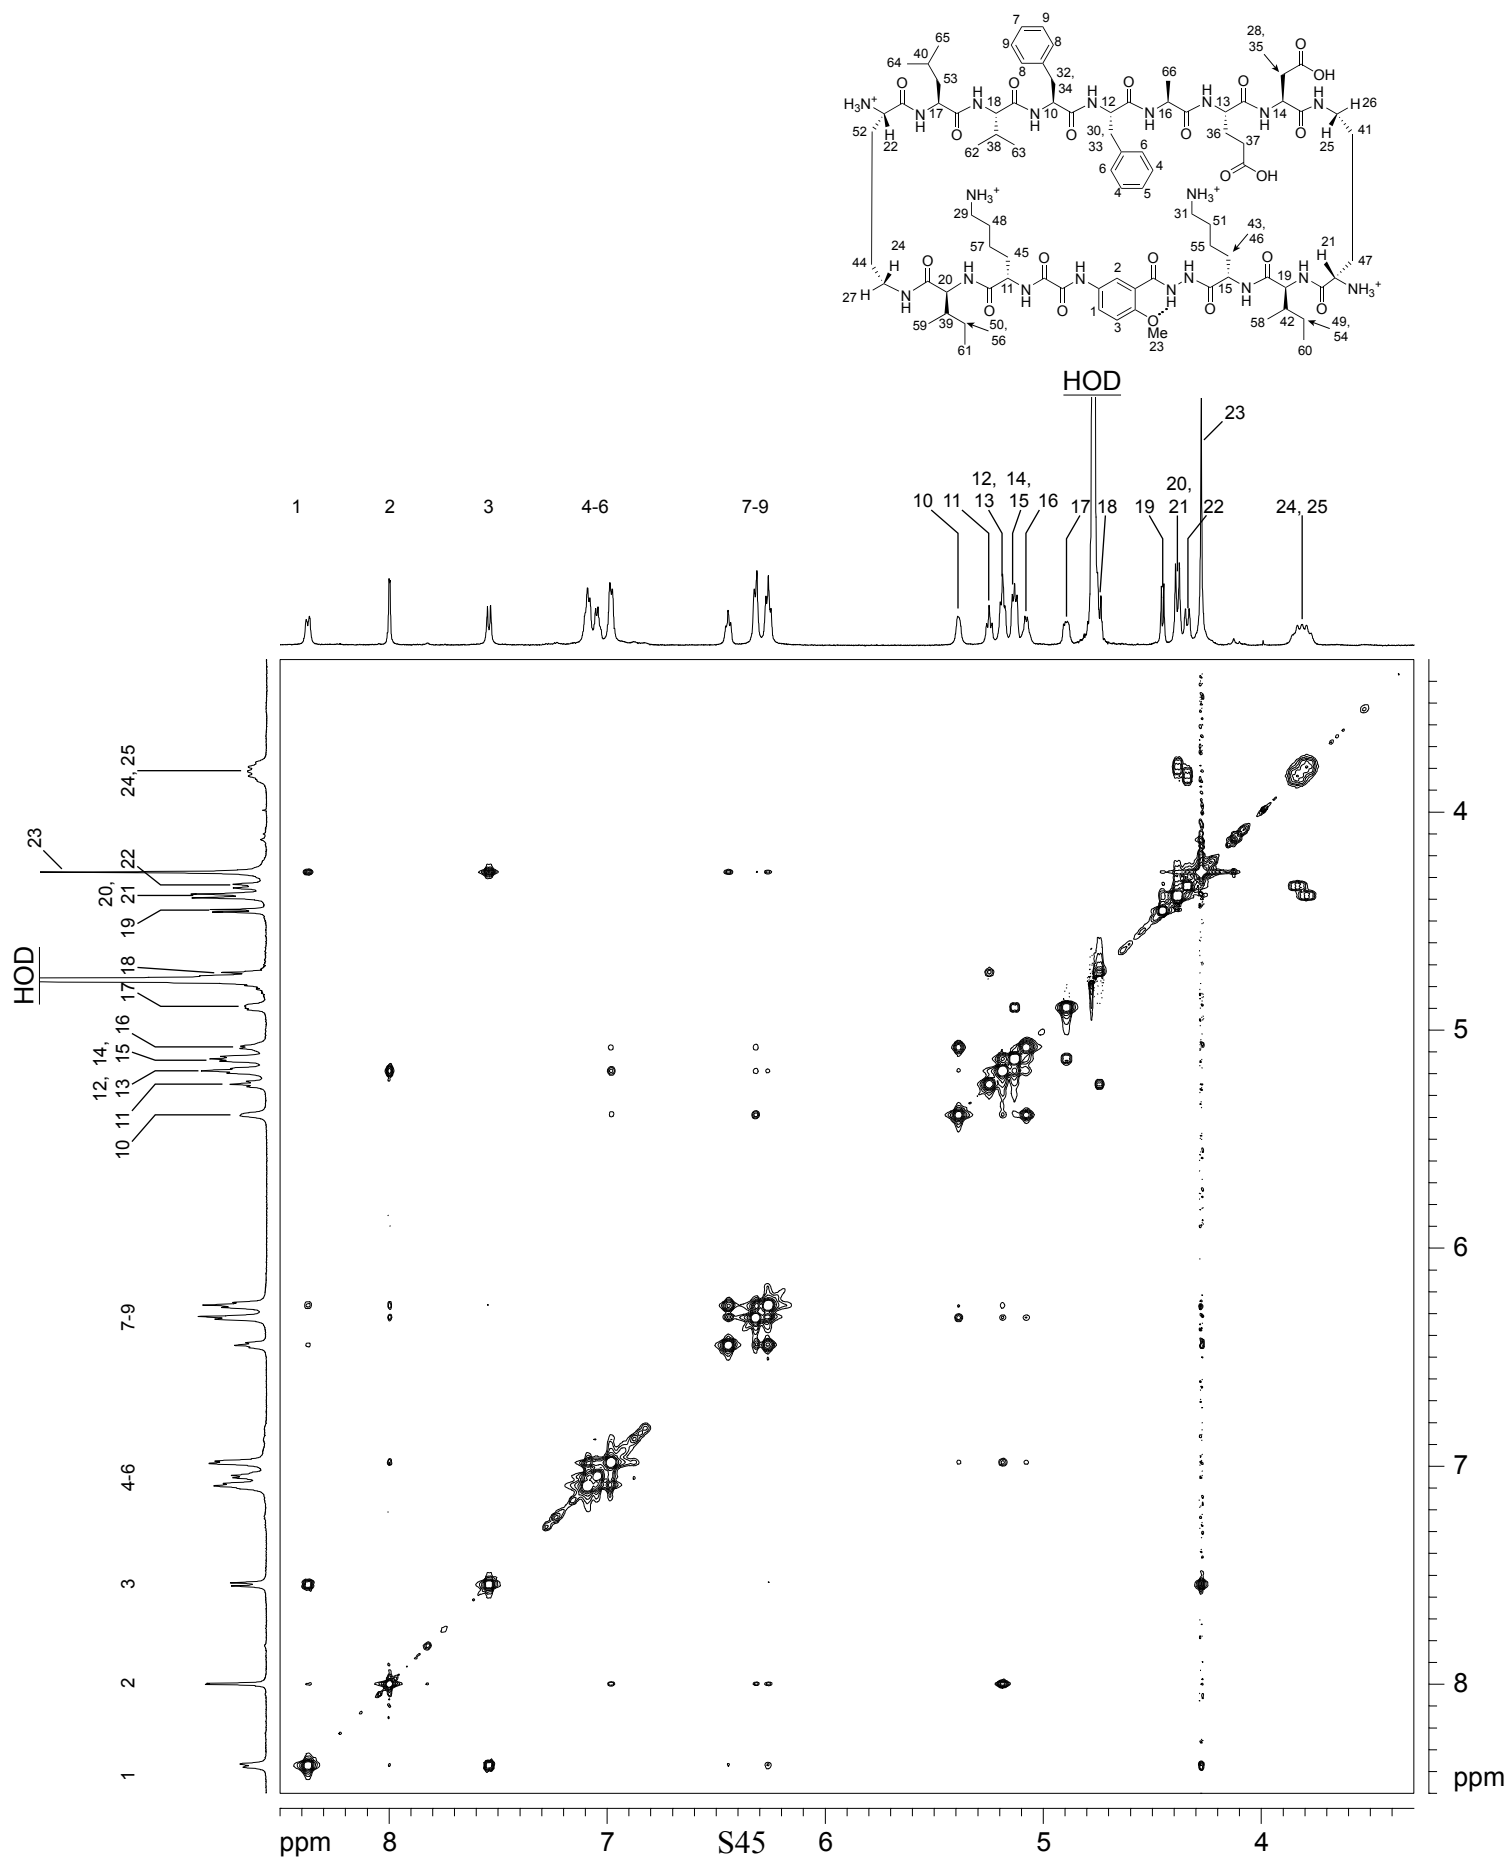

<sup>1</sup>H NMR 2D NOESY of peptide **1a** with presaturation suppression of the HOD peak  
8 mM in D<sub>2</sub>O at 600 MHz and 298 K with 150-ms mixing time

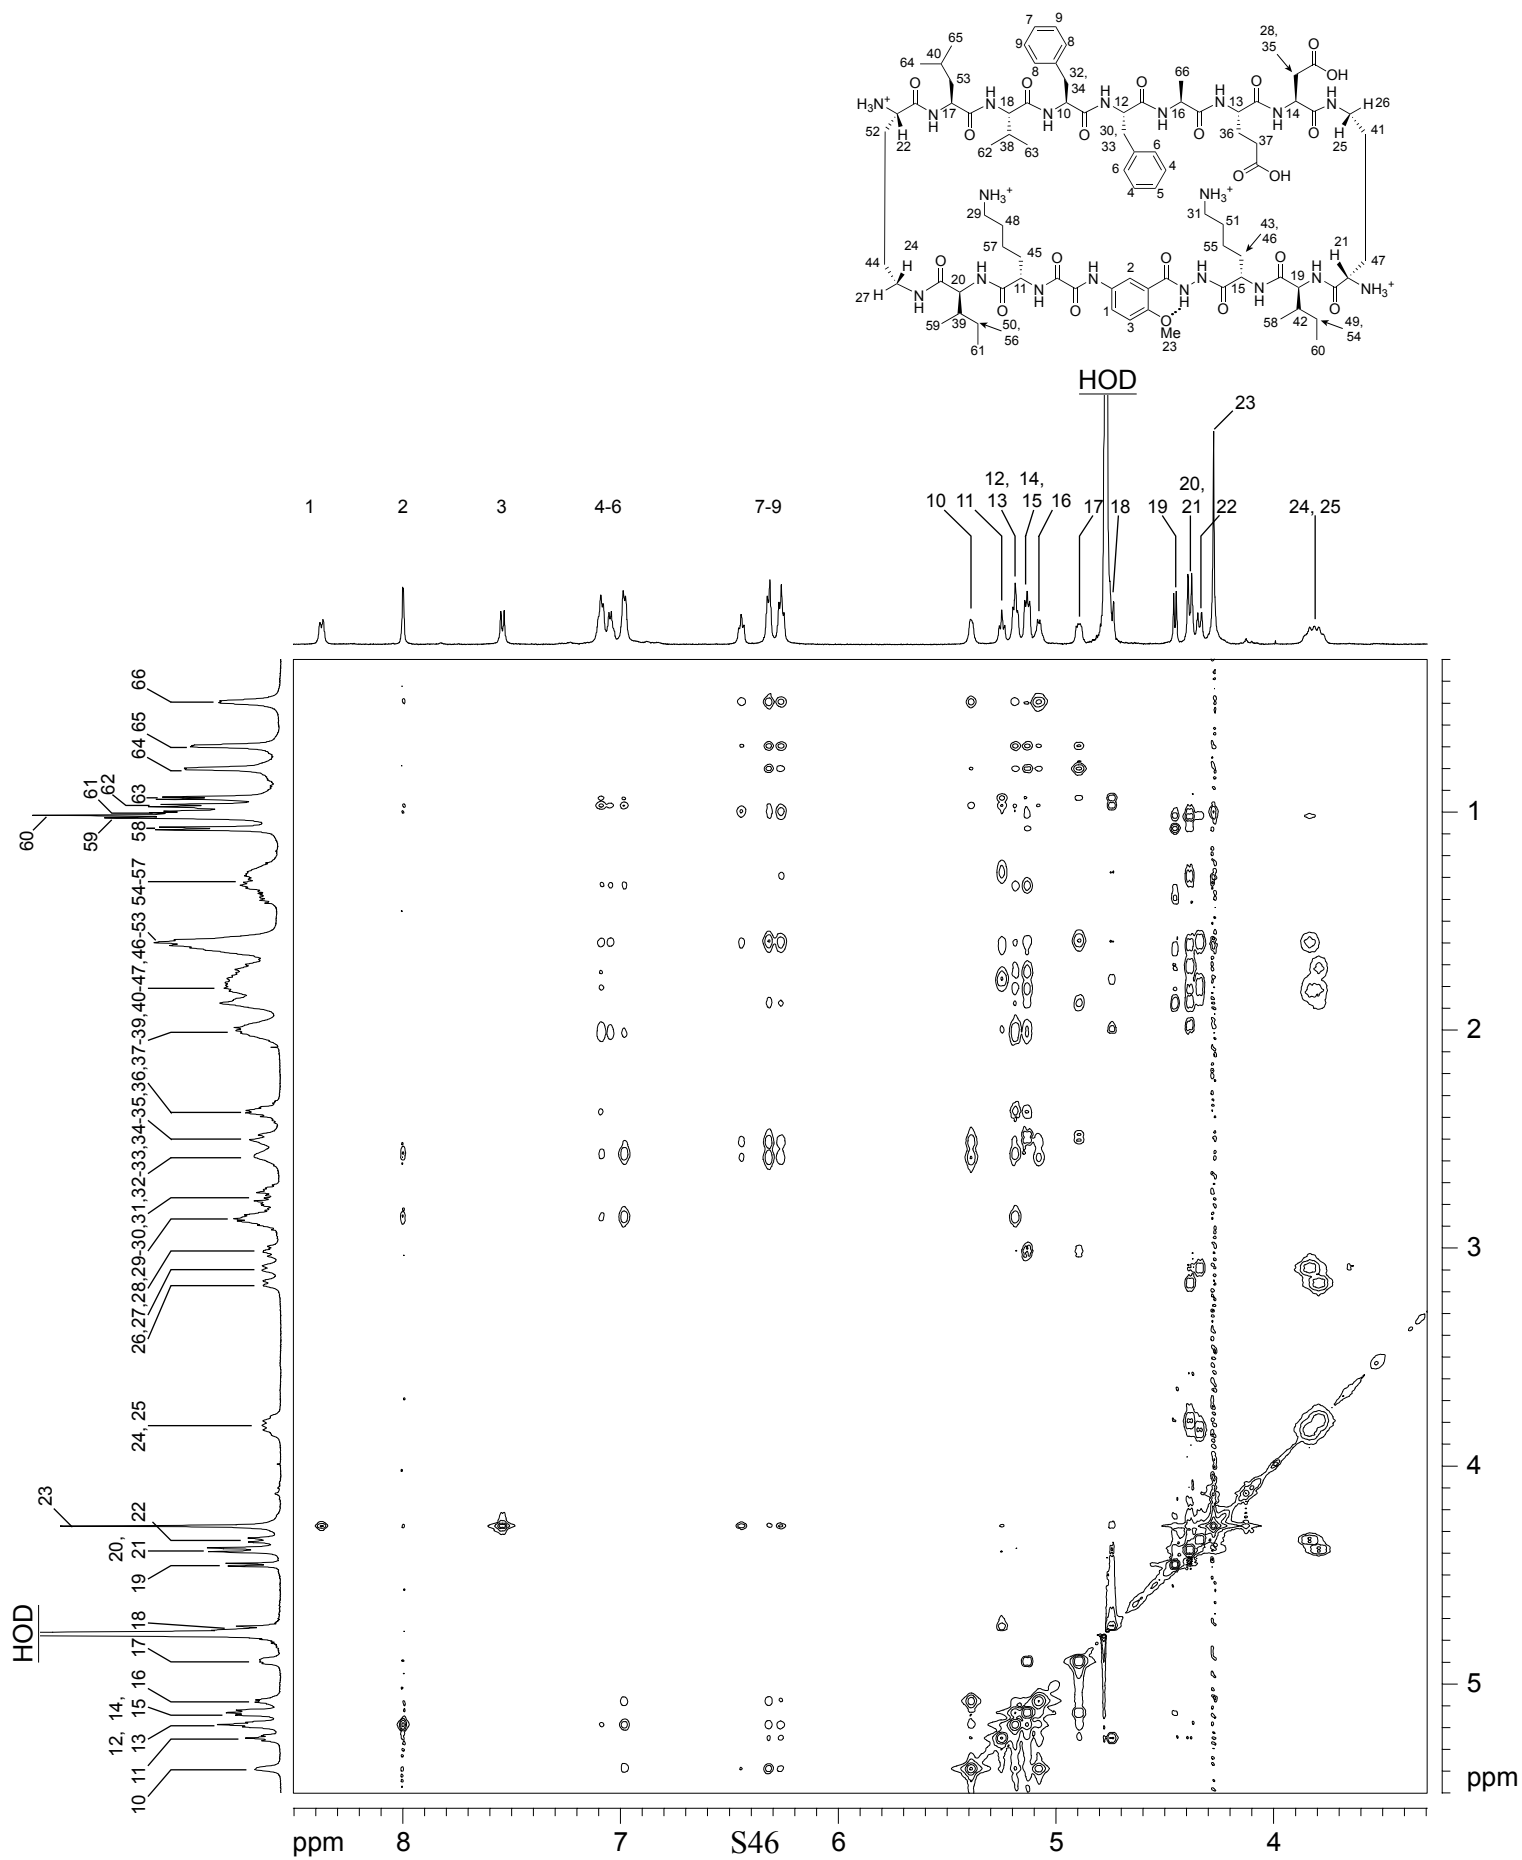

<sup>1</sup>H NMR 2D NOESY of peptide **1a** with presaturation suppression of the HOD peak  
8 mM in D<sub>2</sub>O at 600 MHz and 298 K with 150-ms mixing time

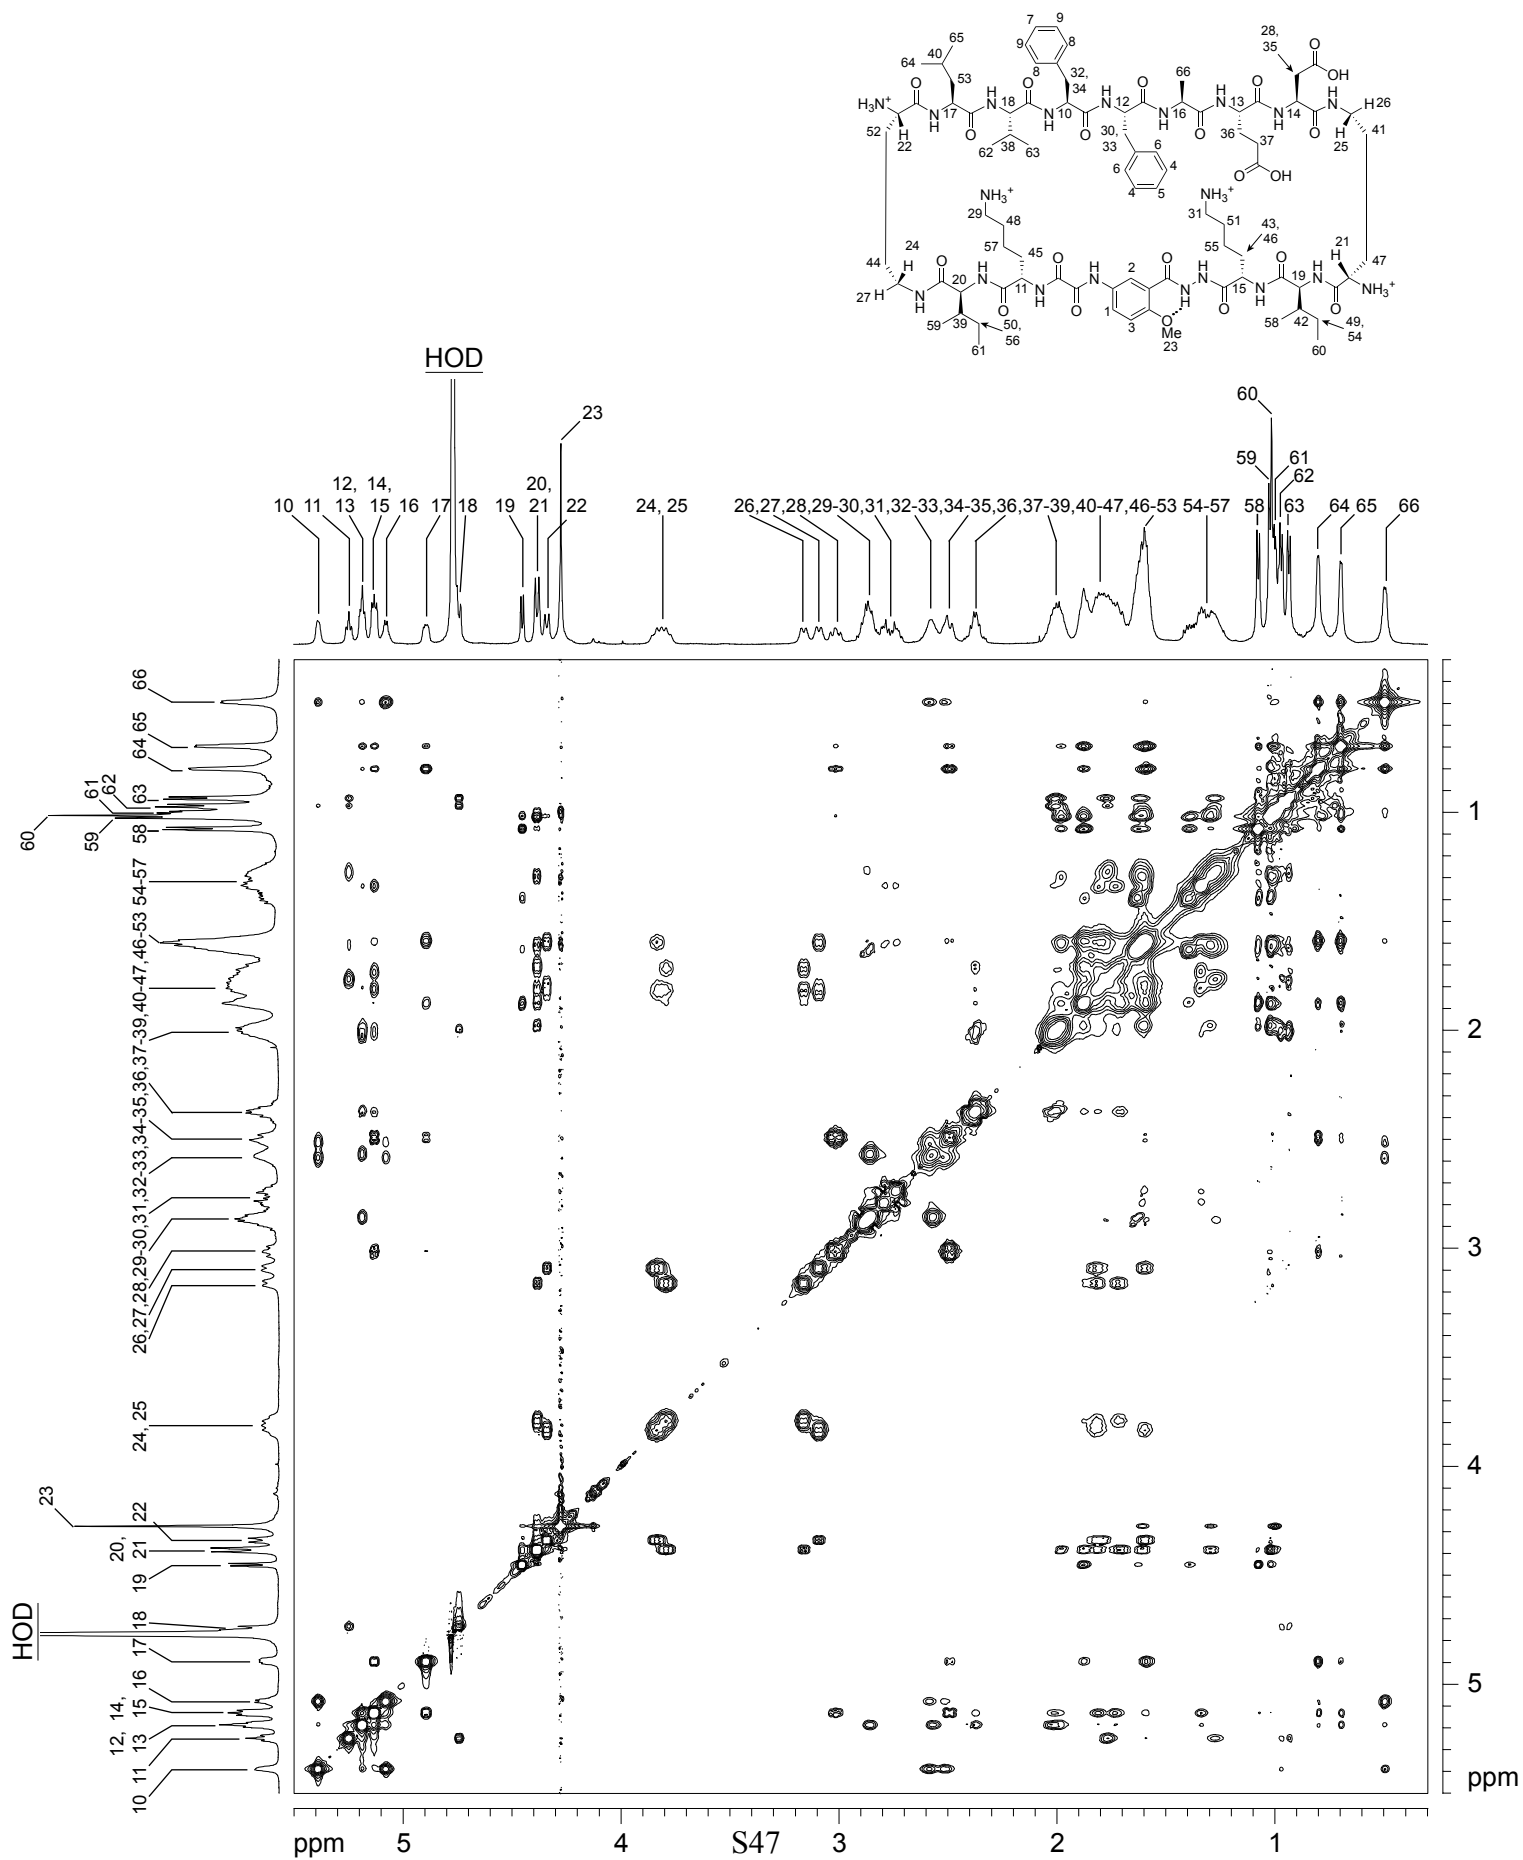

<sup>1</sup>H NMR 2D EXSY of peptide **1a** with presaturation suppression of the HOD peak  
8 mM in D<sub>2</sub>O at 600 MHz and 318 K with 200-ms spin-lock mixing time  
Exchange crosspeaks are shown in red;  
ROE crosspeaks are shown in black.

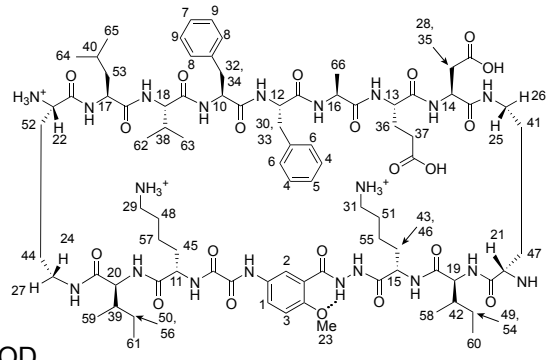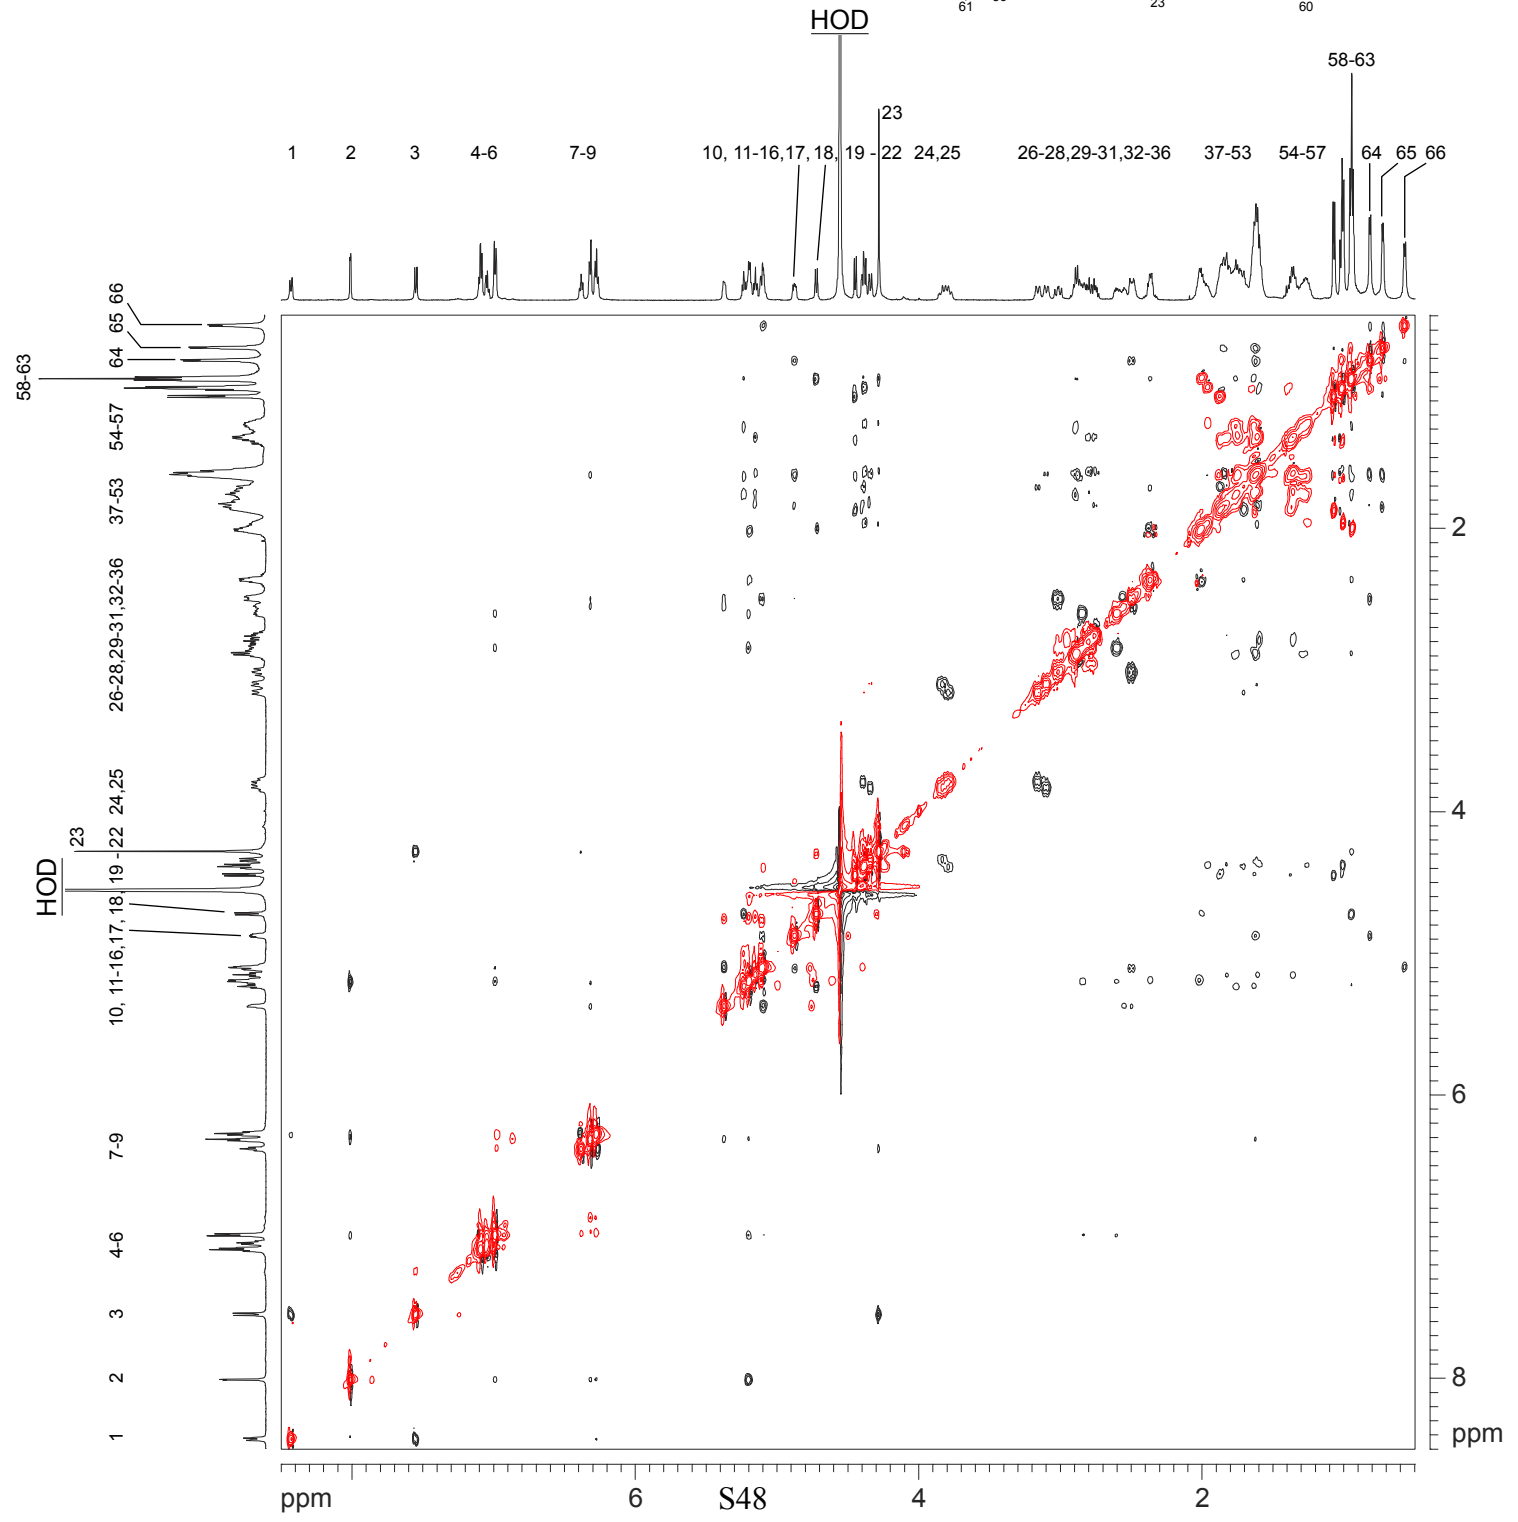



$^1\text{H}$  NMR 2D EXSY of peptide **1a** with presaturation suppression of the HOD peak  
8 mM in  $\text{D}_2\text{O}$  at 600 MHz and 318 K with 200-ms spin-lock mixing time  
Exchange crosspeaks are shown in red;  
ROE crosspeaks are shown in black.

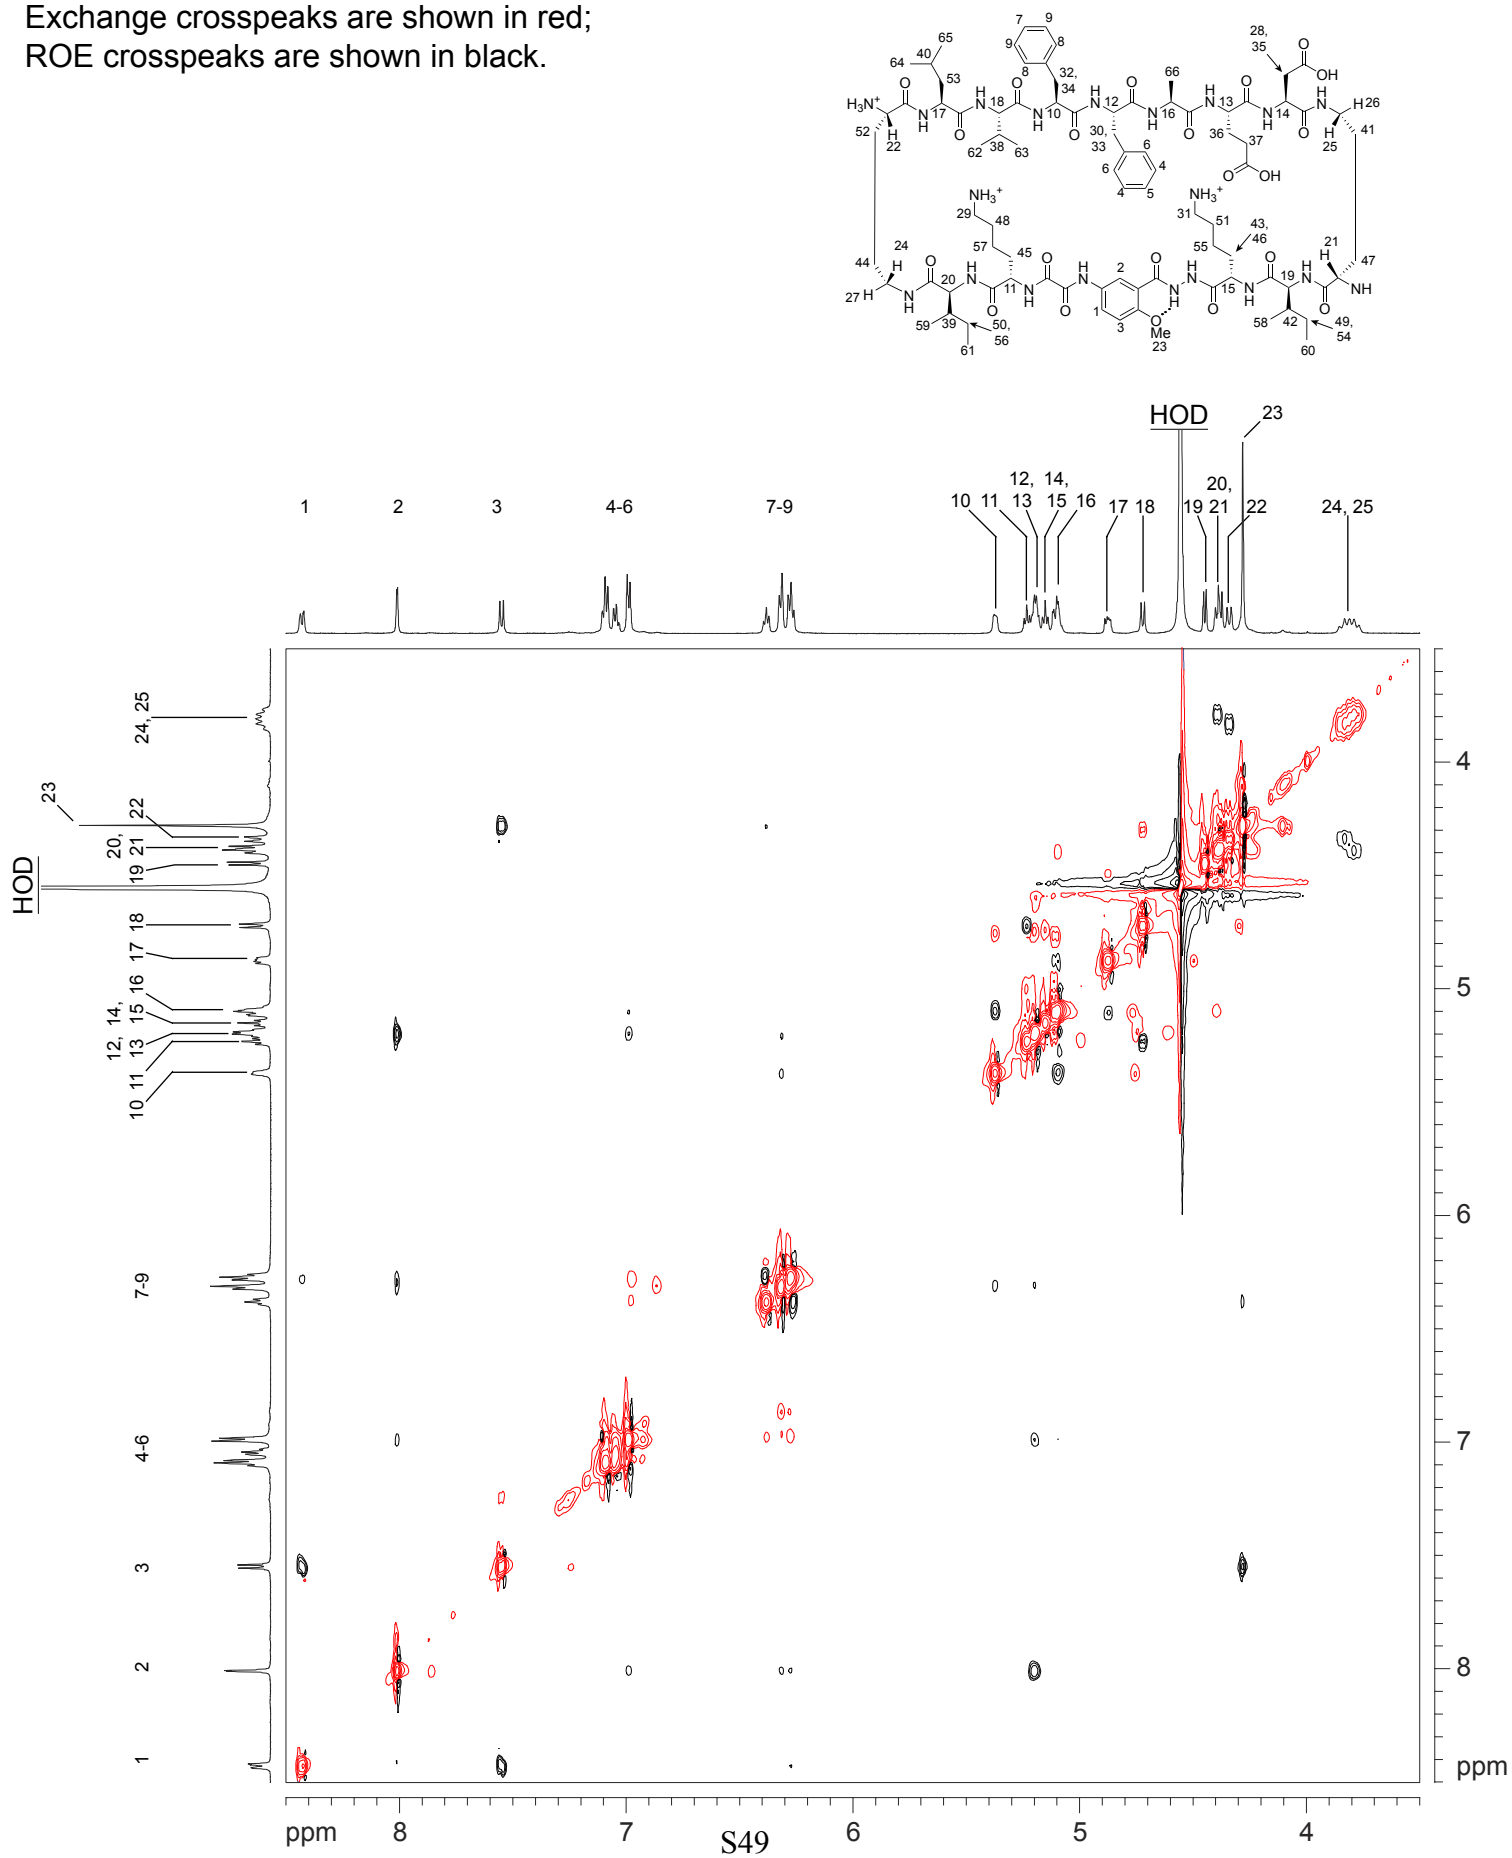

$^1\text{H}$  NMR 2D EXSY of peptide **1a** with presaturation suppression of the HOD peak  
8 mM in  $\text{D}_2\text{O}$  at 600 MHz and 318 K with 200-ms spin-lock mixing time  
Exchange crosspeaks are shown in red;  
ROE crosspeaks are shown in black.

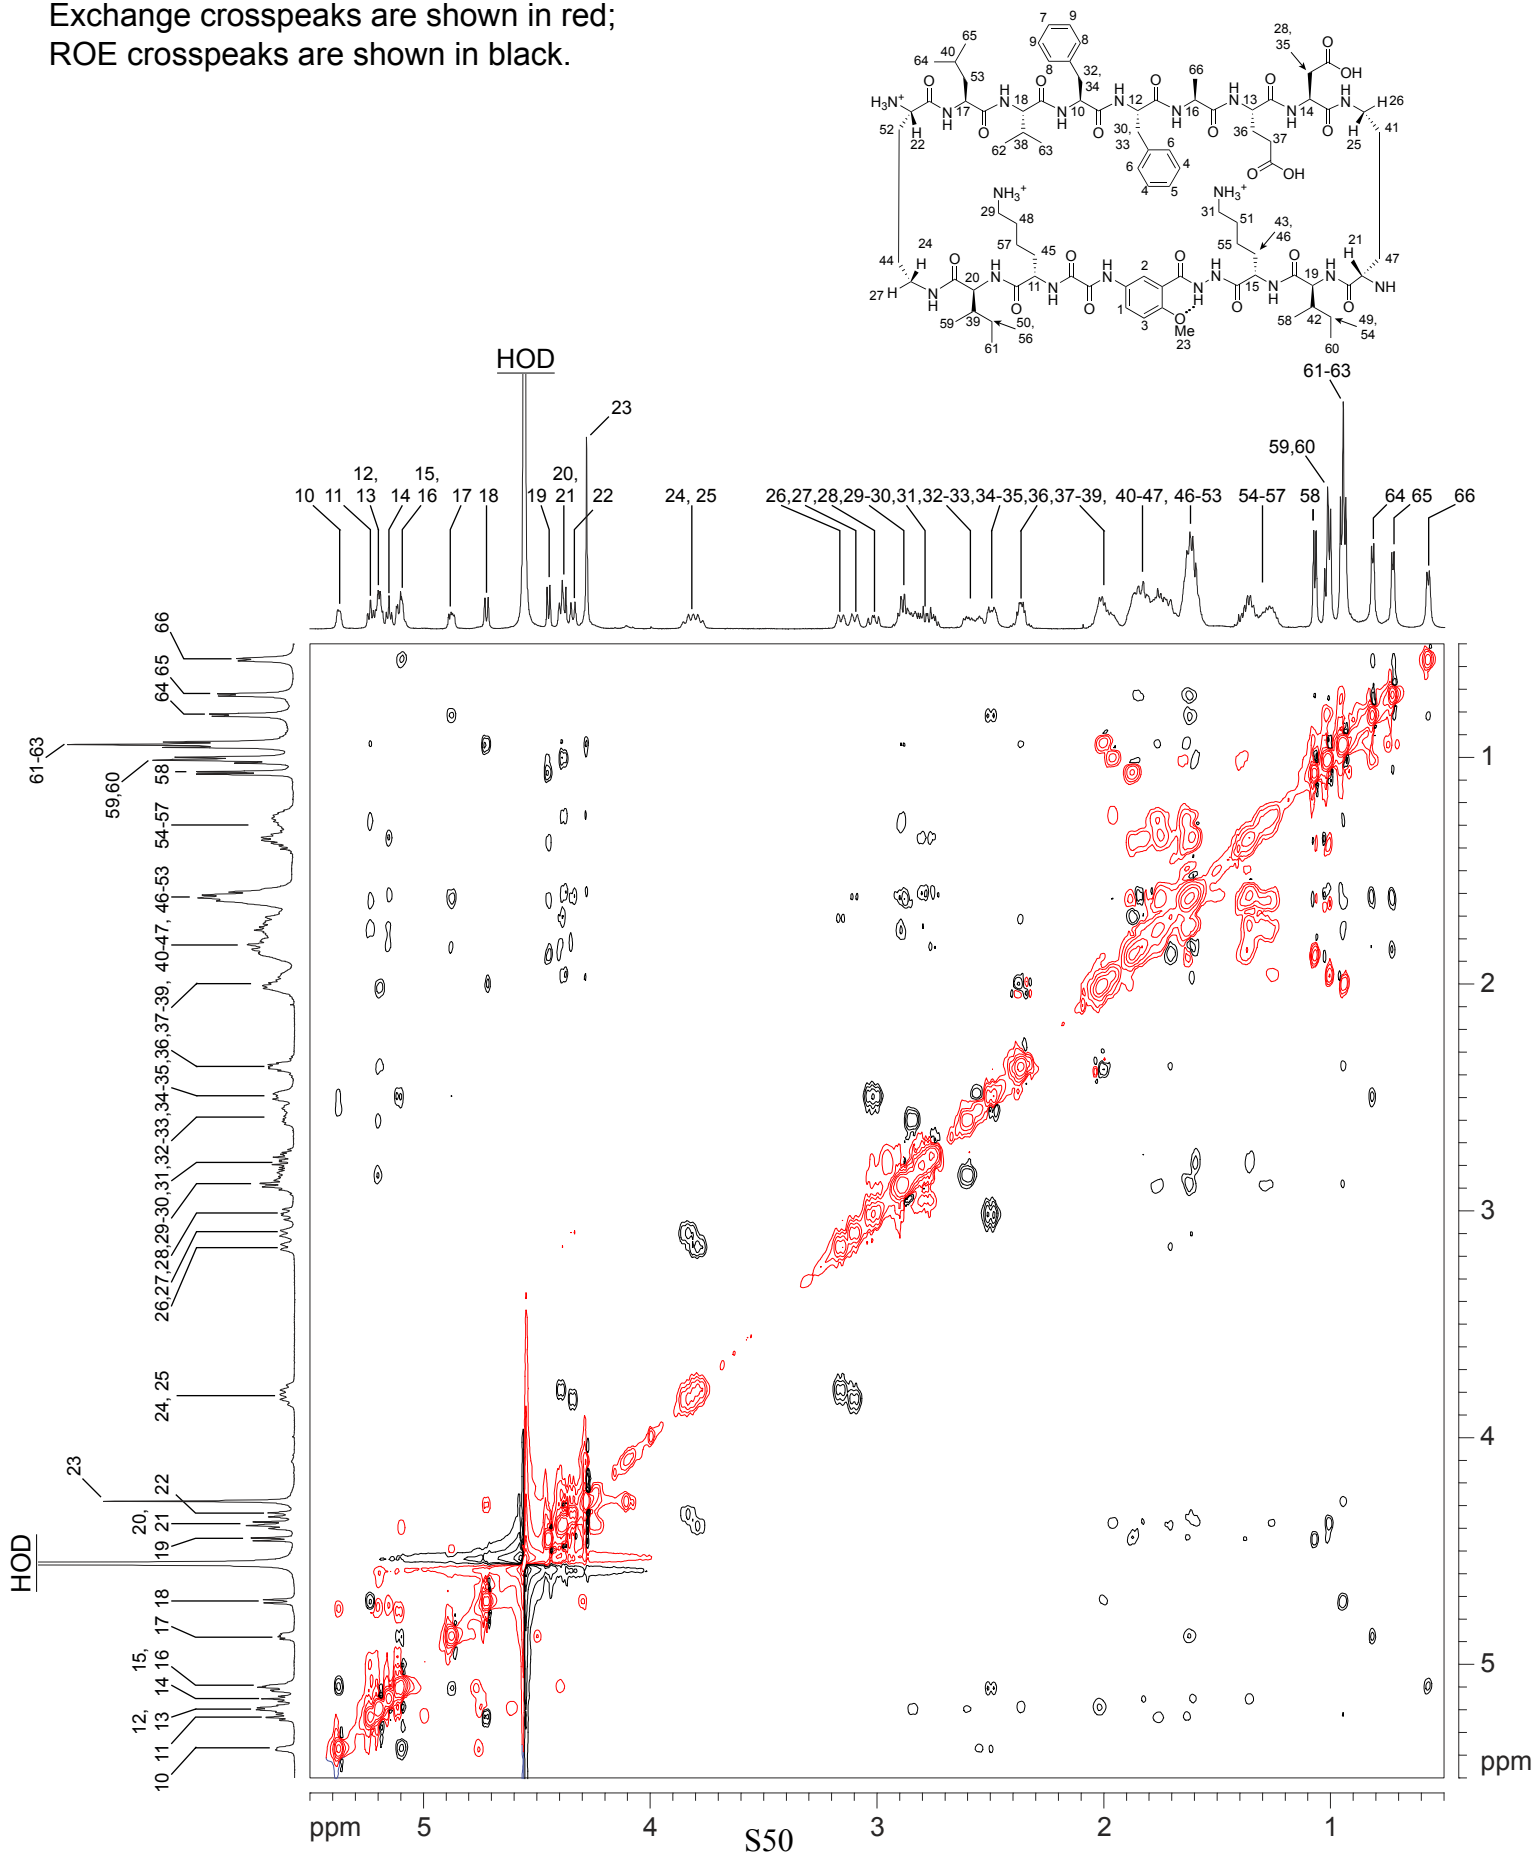

$^1\text{H}$  NMR DOSY of peptide **1a**, 8 mM in  $\text{D}_2\text{O}$  at 500 MHz and 298 K  
tetramer predominates

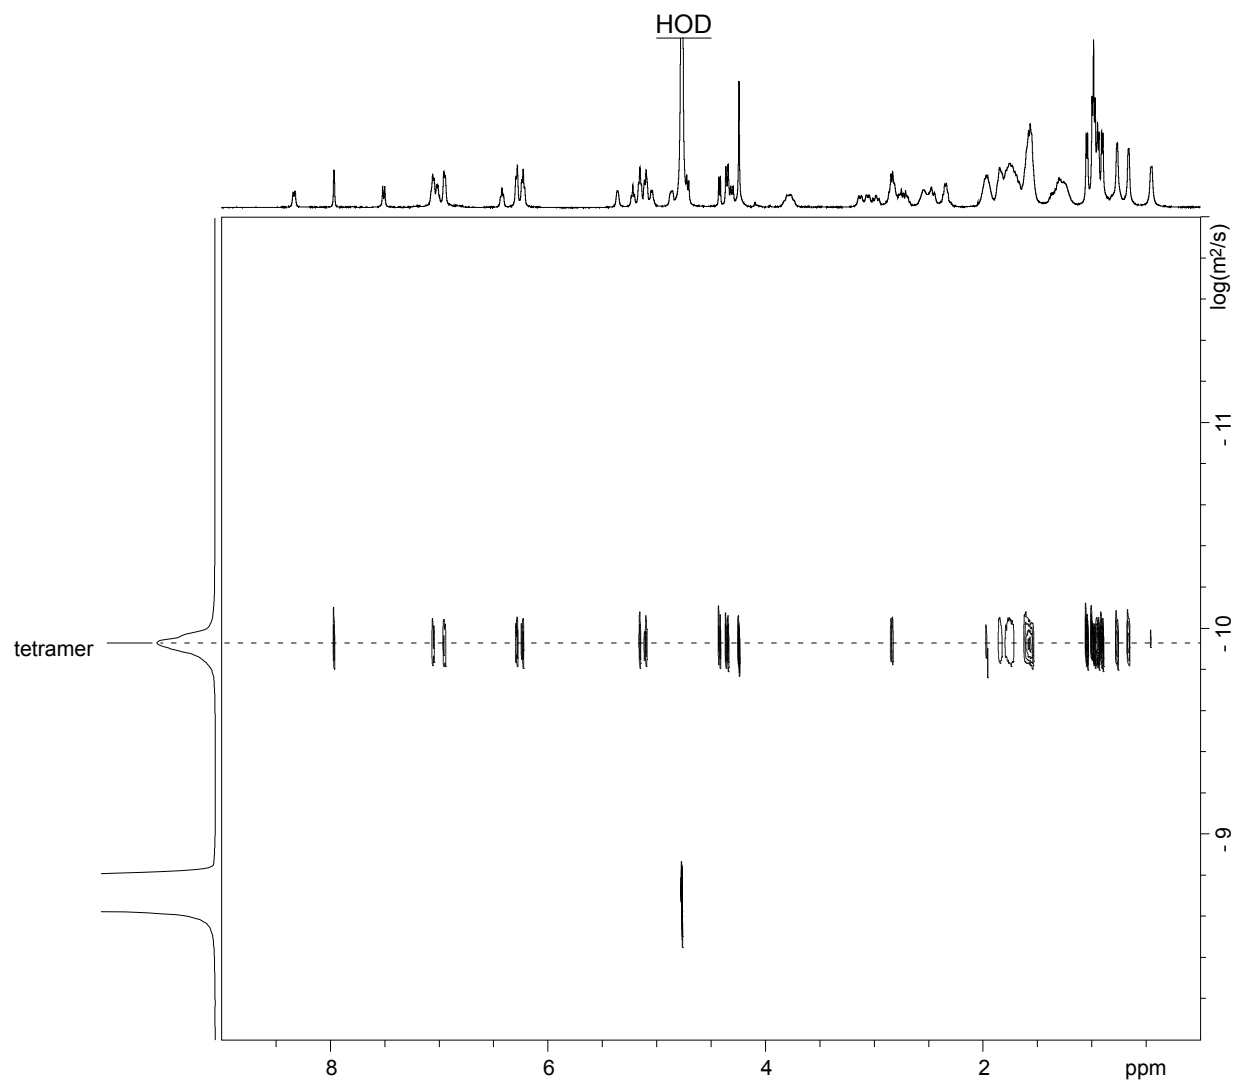

Calculations for peptide **1a** at 8.0 mM

$$D_{\text{HOD}} = 19.0 \times 10^{-10} \text{ m}^2/\text{s} \text{ }^a$$

$$\log(D_{\text{HOD}}) = -8.721$$

$$D_{\text{tetramer}}: \log(D) = -9.928; D = 10^{-9.928} = 11.8 \pm 1.0 \times 10^{-11} \text{ m}^2/\text{s}$$

<sup>a</sup>Longworth, L. G. *J. Phys. Chem.* **1960**, *64*, 1914–1917.

RP-HPLC of peptide **1b**

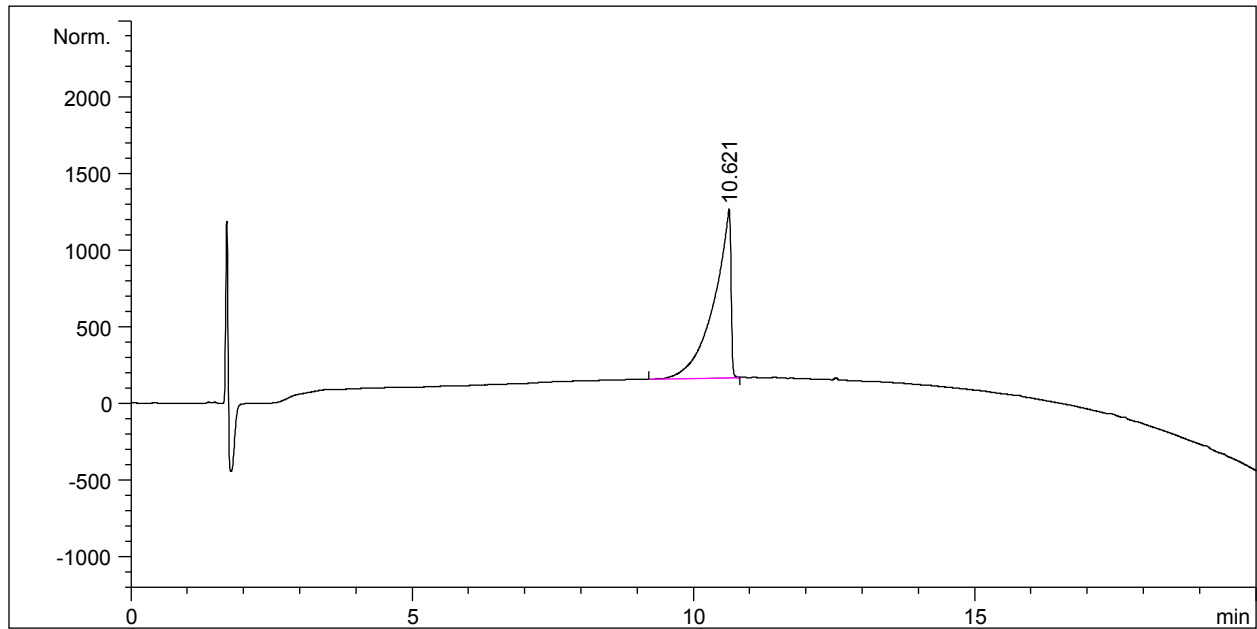

| Peak #   | RetTime [min] | Type | Width [min] | Area mAU*s | Height [mAU] | Area %   |
|----------|---------------|------|-------------|------------|--------------|----------|
| 1        | 10.621        | BV   | 0.2642      | 2.29549e4  | 1098.58997   | 100.0000 |
| Totals : |               |      |             | 2.29549e4  | 1098.58997   |          |

**column:** Aeris XB-C18 2.6μ  
**dimensions:** 150 mm x 4.6 mm  
**mobile phase:** A: H<sub>2</sub>O, 0.1% TFA  
 B: CH<sub>3</sub>CN, 0.1% TFA  
**gradient:** A/B (95:5) to (0:100) in 20 min  
**flow rate:** 1.0 mL/min  
**detection:** VWD, wavelength = 214 nm  
**temperature:** 298 K

MS (ESI) of peptide **1b**

NT\_iv\_1b-1 6 (0.110) Sb (1,10.00) ; Sm (Mn, 4x3.00); Cm (6:26)

TOF MS ES+  
2.98e3

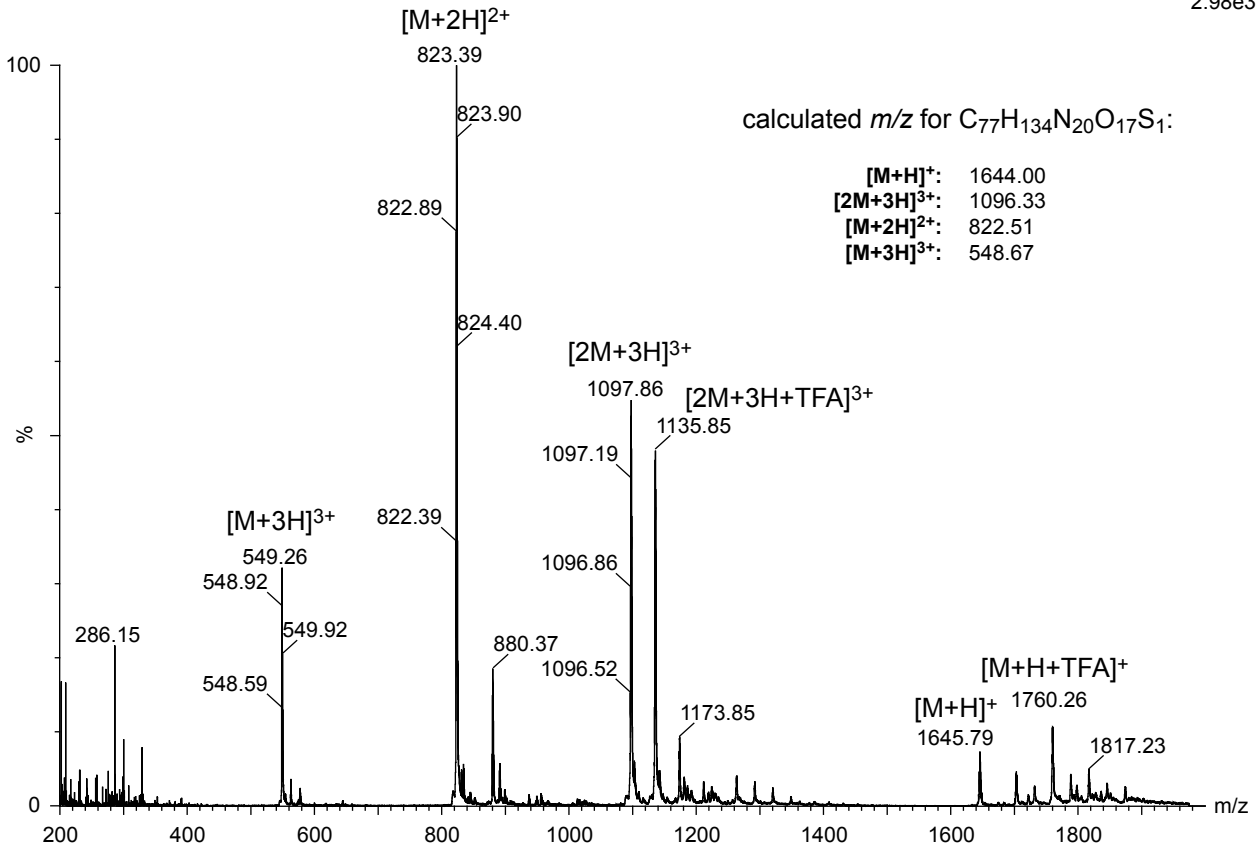

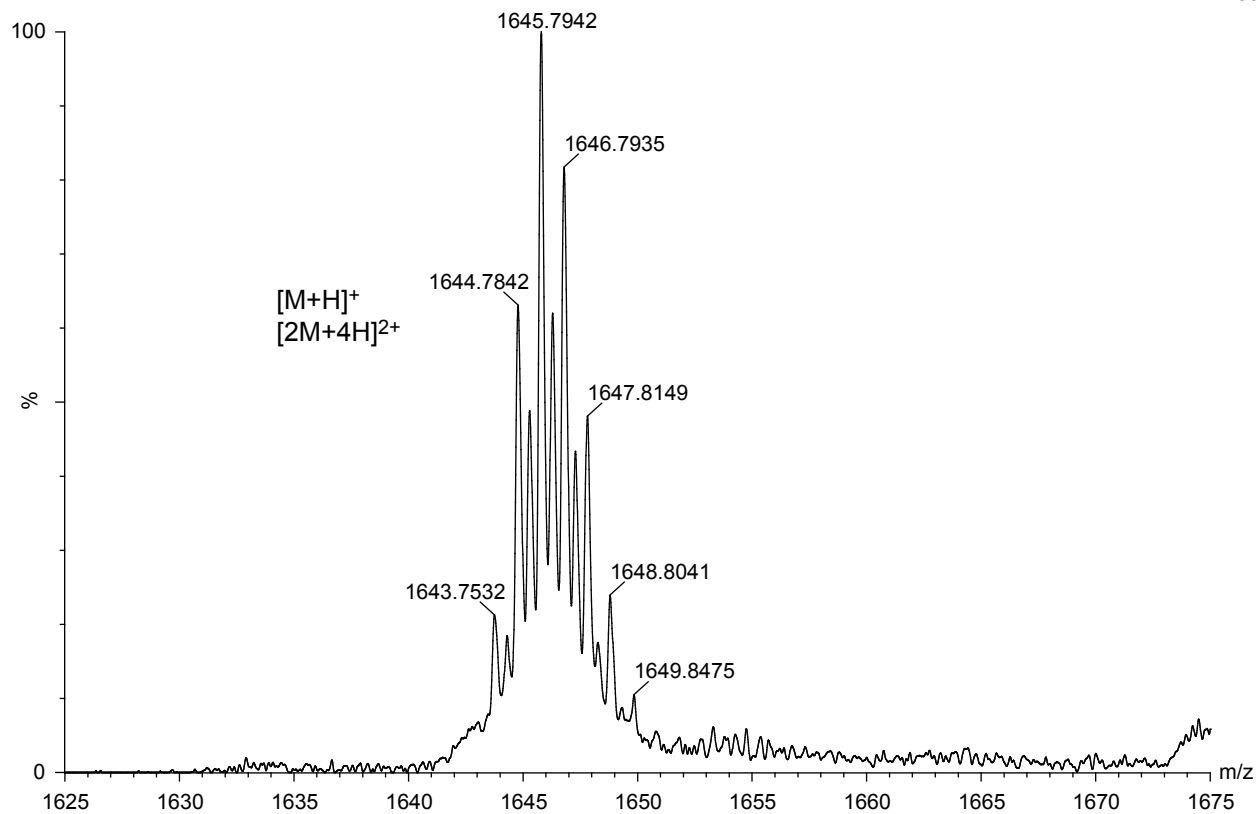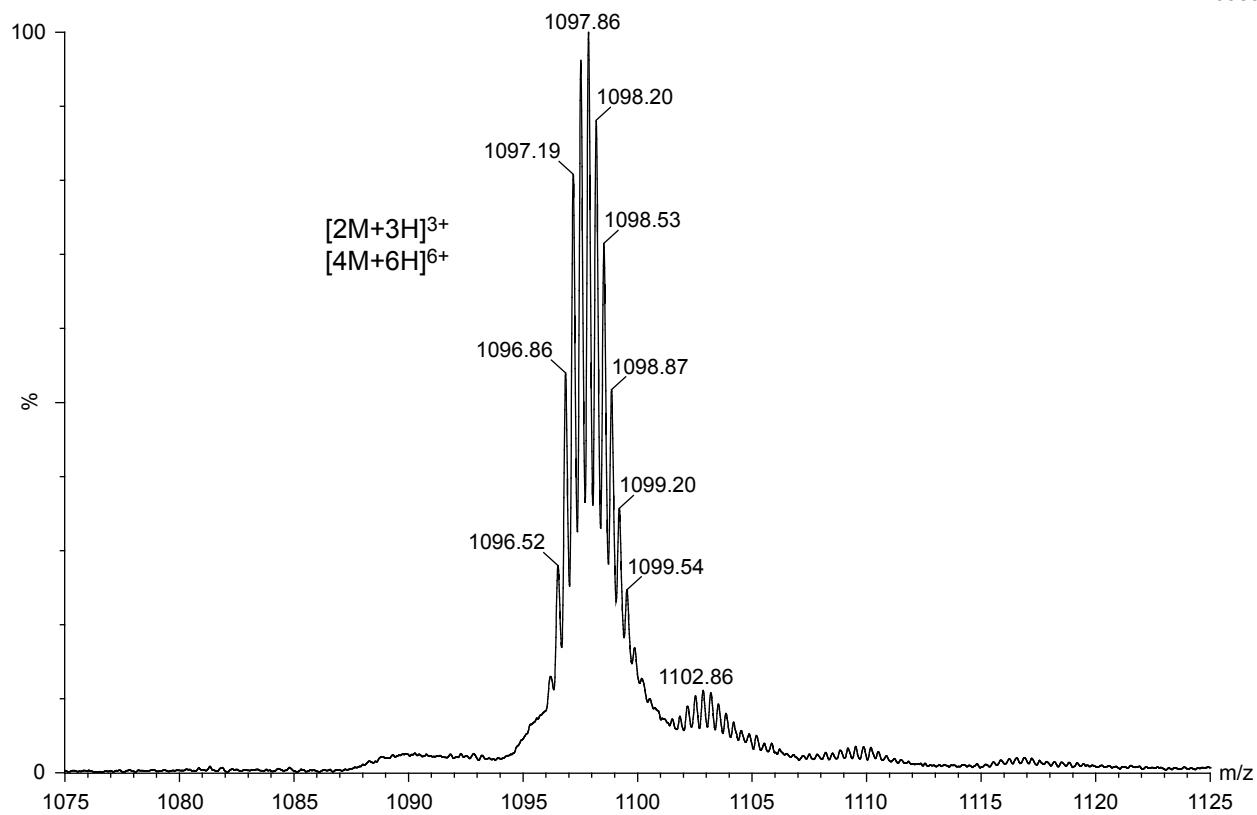

NT\_iv\_1b-1 6 (0.110) Sb (1,10.00); Sm (Mn, 4x3.00); Cm (6:26)

TOF MS ES+  
2.98e3

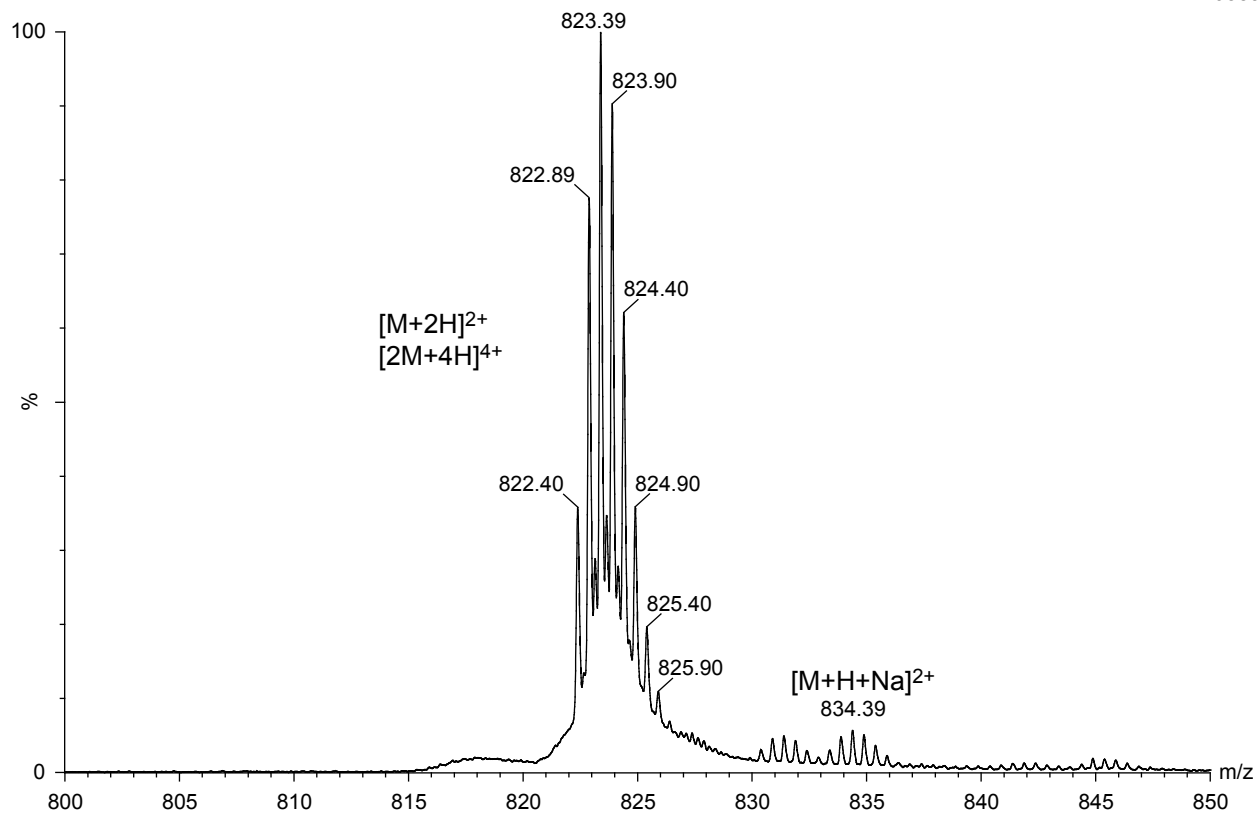

NT\_iv\_1b-1 6 (0.110) Sb (1,10.00); Sm (Mn, 4x3.00); Cm (6:26)

TOF MS ES+  
959

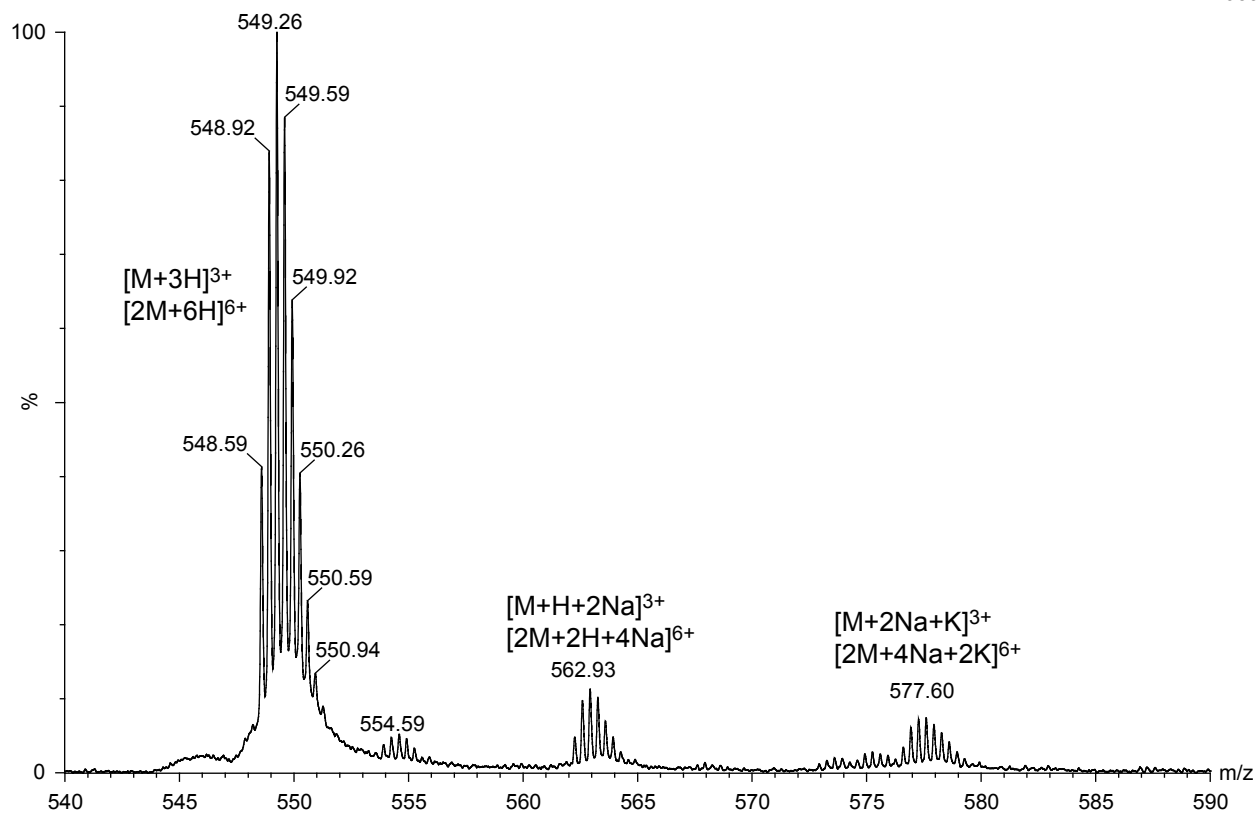

# <sup>1</sup>H NMR of peptide 1b, 1 mM in D<sub>2</sub>O at 600 MHz and 293 K

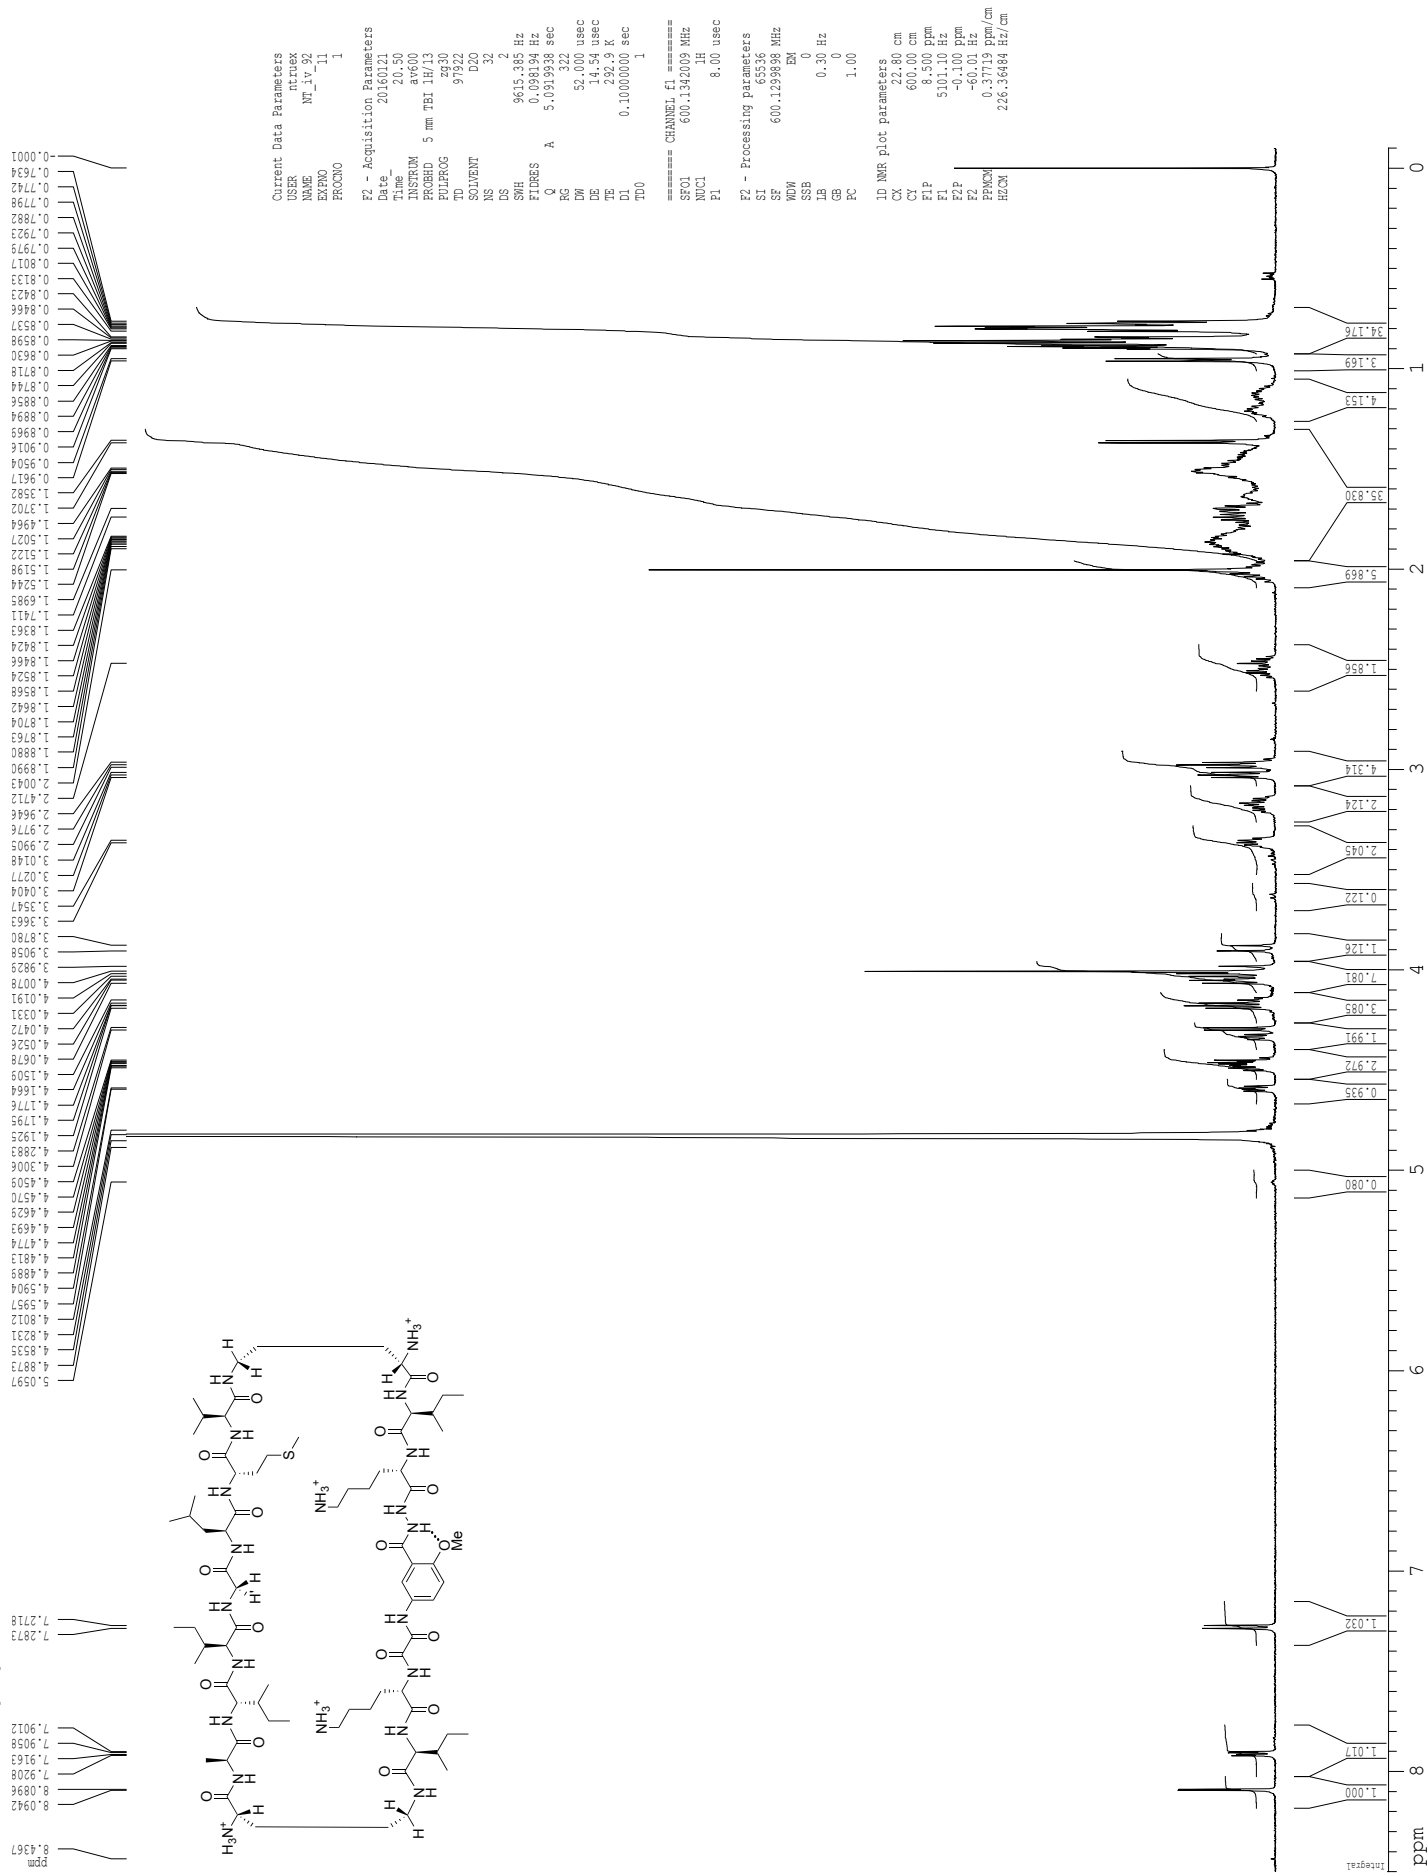

<sup>1</sup>H NMR of peptide 1b, 1 mM in D<sub>2</sub>O at 600 MHz and 293 K

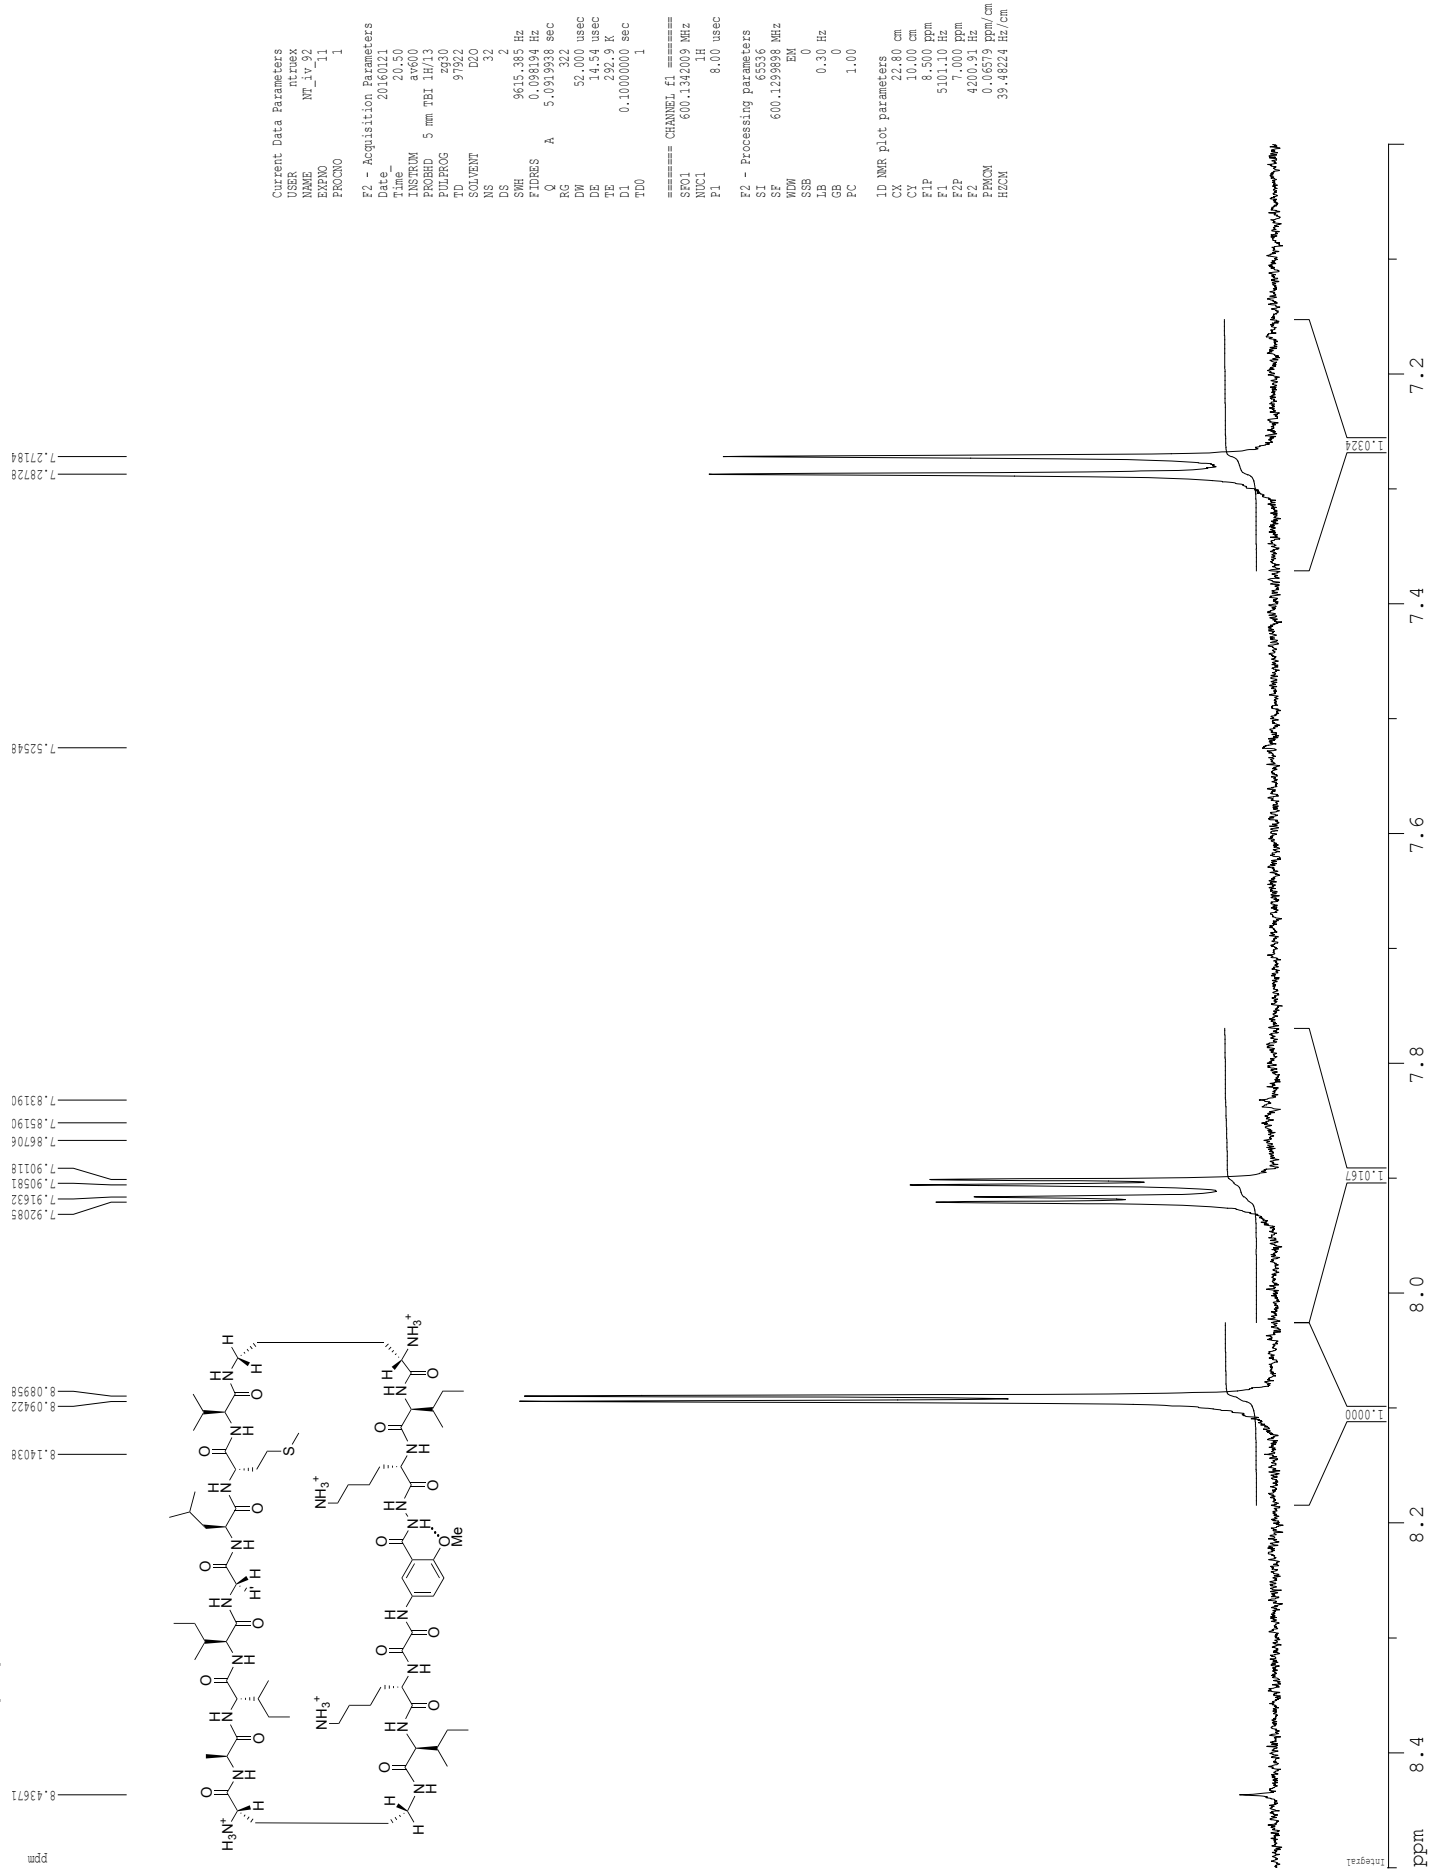



# <sup>1</sup>H NMR of peptide 1b, 1 mM in D<sub>2</sub>O at 600 MHz and 293 K

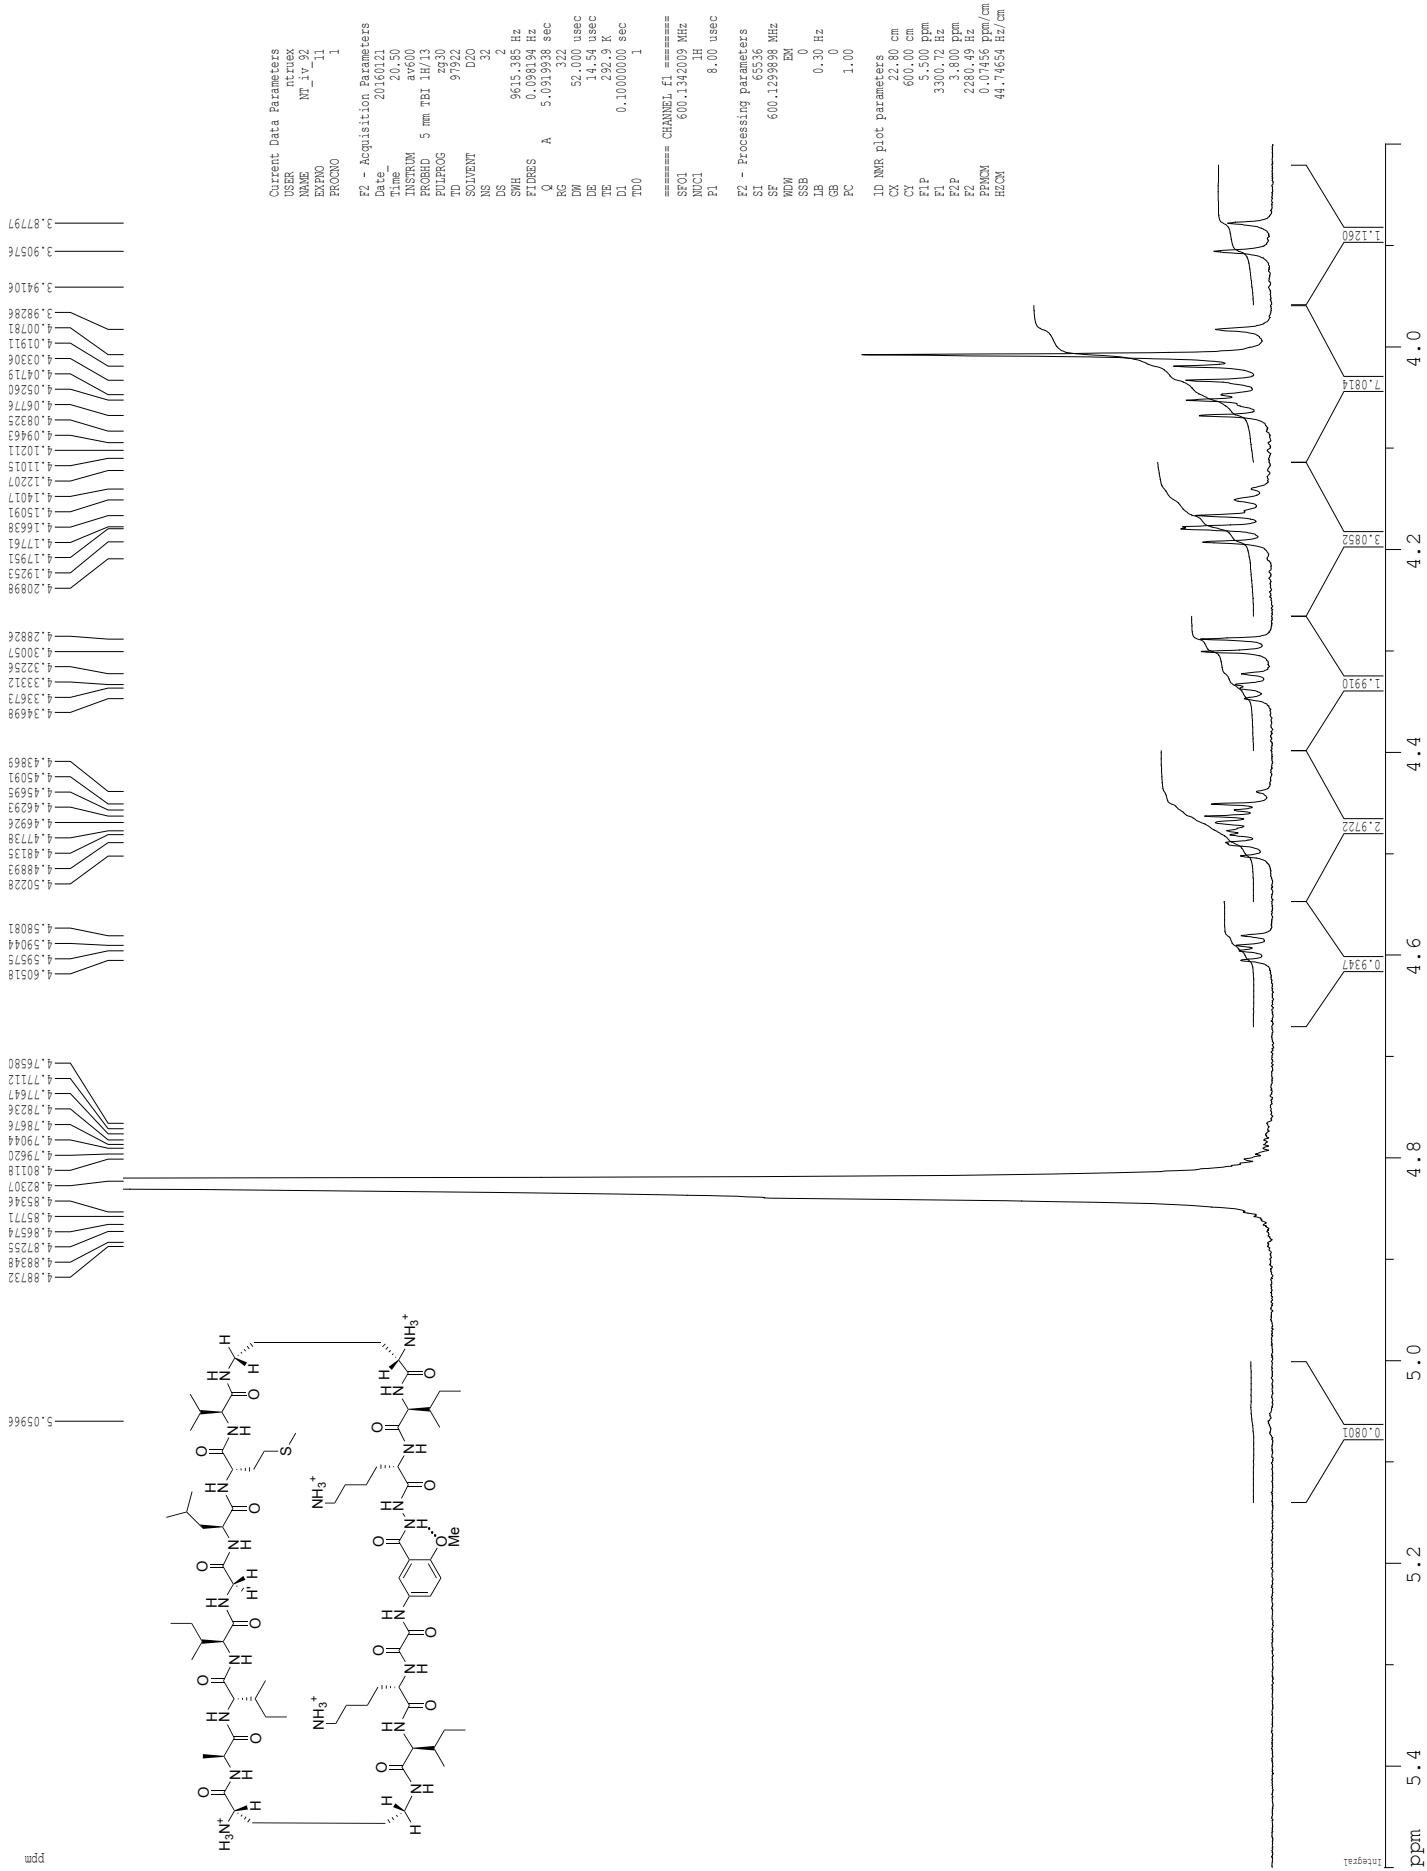

# <sup>1</sup>H NMR of peptide 1b, 1 mM in D<sub>2</sub>O at 600 MHz and 293 K

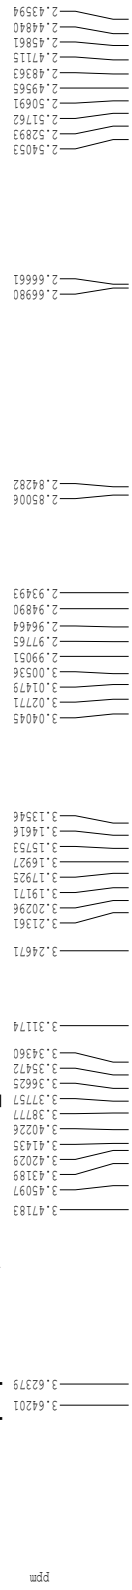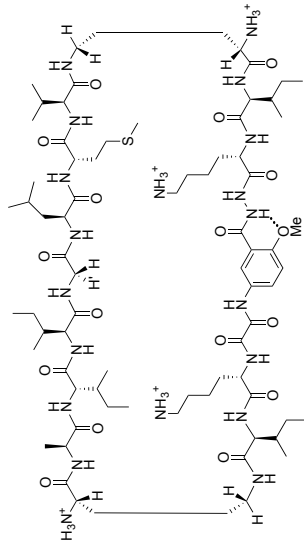

```

Current Data Parameters
USER          ntruex
NAME         MM_iv_32
EXPNO        11
PROCNO       1

F2 - Acquisition Parameters
Date_        20160121
Time_        20.50
INSTRUM      av600
PROBHD       5 mm TBI 1H/13
PULPROG      zg30
TD            65536
SOLVENT      D2O
NS            32
DS            2
SWH           9615.385 Hz
FIDRES        0.098194 Hz
AQ            5.0919938 sec
RG            322
DW            52.000 usec
DE            14.94 usec
TE            292.2 K
D0            0.10000000 sec
TD0           1

===== CHANNEL f1 =====
SFO1          600.1342019 MHz
NUC1          1H
P1            8.00 usec

F2 - Processing parameters
SI            65536
SF            600.1259888 MHz
WDW           EM
SSB           0
LB            0.30 Hz
GB            0
PC            1.00

ID NMR plot parameters
CX            20.00 cm
CY            20.00 cm
CZ            1.800 cm
EI1           2280.49 Hz
EI2           2.300 ppm
EI3           1380.30 Hz
PRFMCN        0.06579 ppm/cm
HZCM          39.48224 Hz/cm
    
```

**<sup>1</sup>H NMR of peptide 1b, 1 mM in D<sub>2</sub>O at 600 MHz and 293 K**

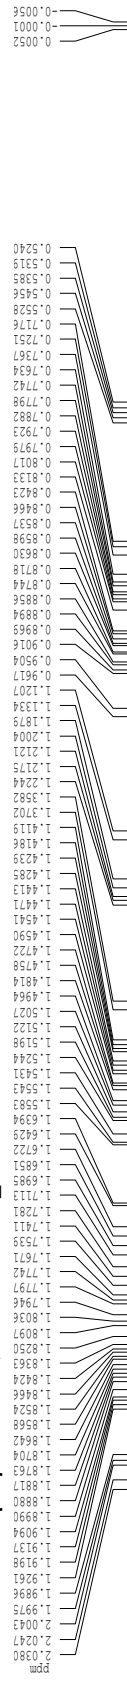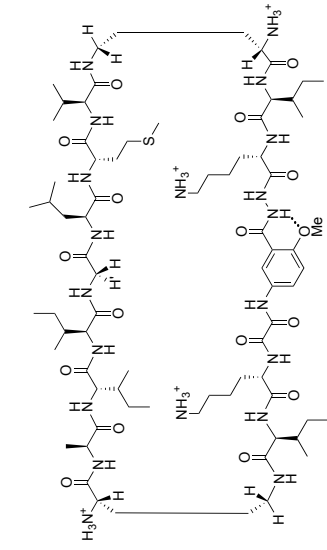

```

Current Data Parameters
USER          ntrux
NAME          M1_v_32
EXPNO        11
PROCNO       1

F2 - Acquisition Parameters
Date_        20160121
Time_        21.50
INSTRUM      ar600
PROBHD       5 mm TBI 1H/13
PULPROG      zg30
TD           65536
SOLVENT      D2O
NS           32
DS           2
SWH          9615.385 Hz
FIDRES       0.098194 Hz
AQ           5.0919938 sec
RG           322
DE           52.000 usec
TE           282.2 K
D0           0.10000000 sec
TD0          1

===== CHANNEL f1 =====
SFO1         600.1342009 MHz
NUC1         1H
P1           8.00 usec

F2 - Processing parameters
SI           65536
SF           600.1259888 MHz
WDW          EM
SSB          0
LB           0.30 Hz
GB           0
PC           1.00

ID NMR-plot parameters
X           72.00 cm
Y           72.00 cm
Z           2.300 cm
EI1         1360.30 Hz
EI2         -0.100 ppm
EI3         -60.01 Hz
PFMCM       0.10526 ppm/cm
HZCM        63.17158 Hz/cm
    
```

<sup>1</sup>H NMR 2D TOCSY of macrocycle **1b** with presaturation suppression of the HOD peak  
1 mM in D<sub>2</sub>O at 600 MHz and 293 K with 150-ms spin-lock mixing time

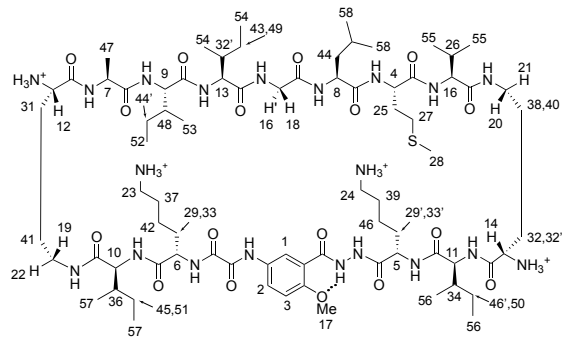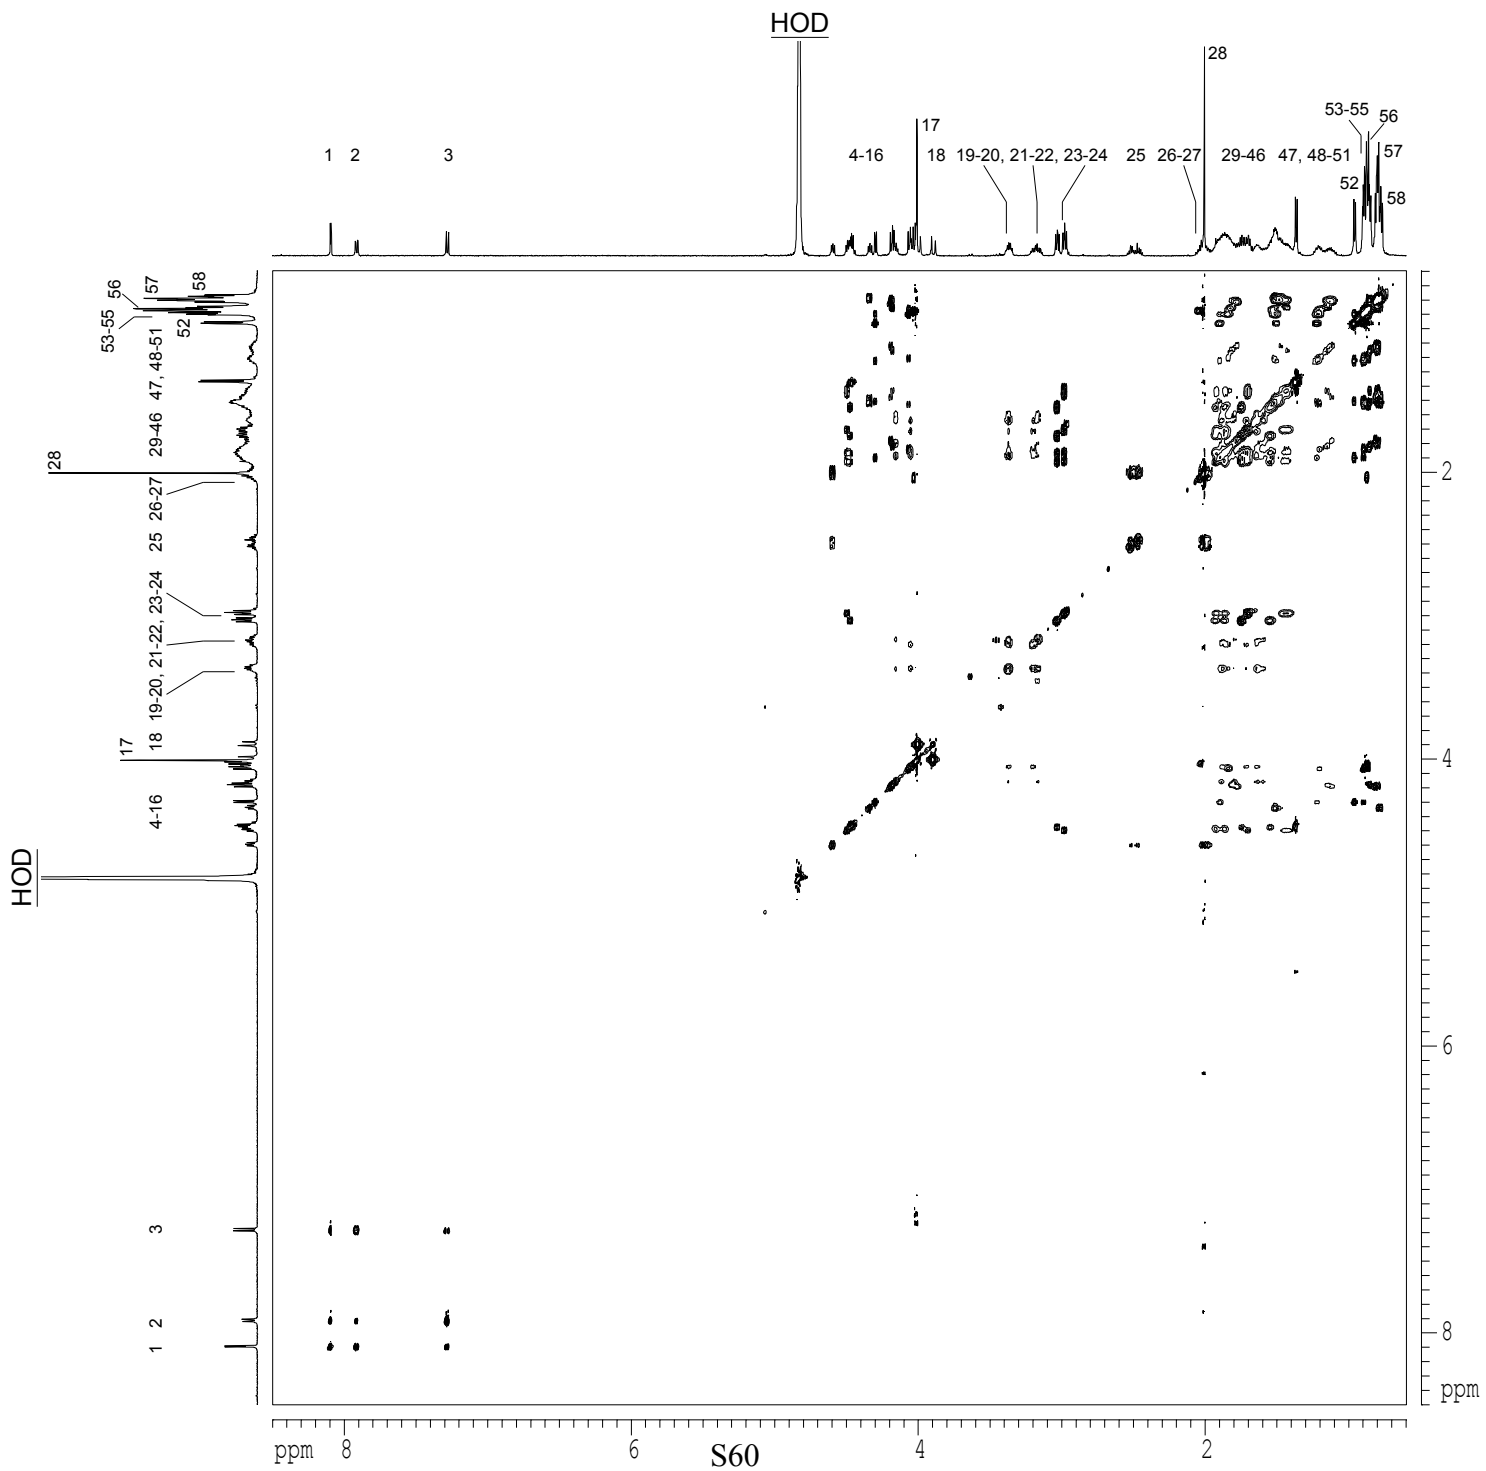

<sup>1</sup>H NMR 2D TOCSY of macrocycle **1b** with presaturation suppression of the HOD peak  
1 mM in D<sub>2</sub>O at 600 MHz and 293 K with 150-ms spin-lock mixing time

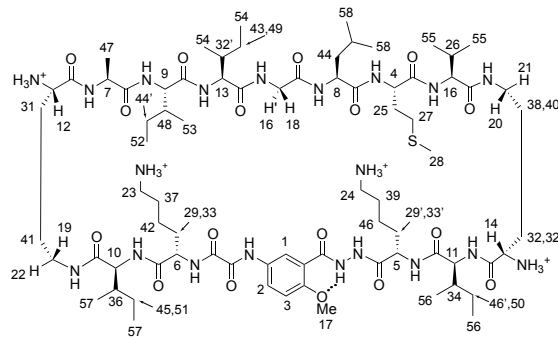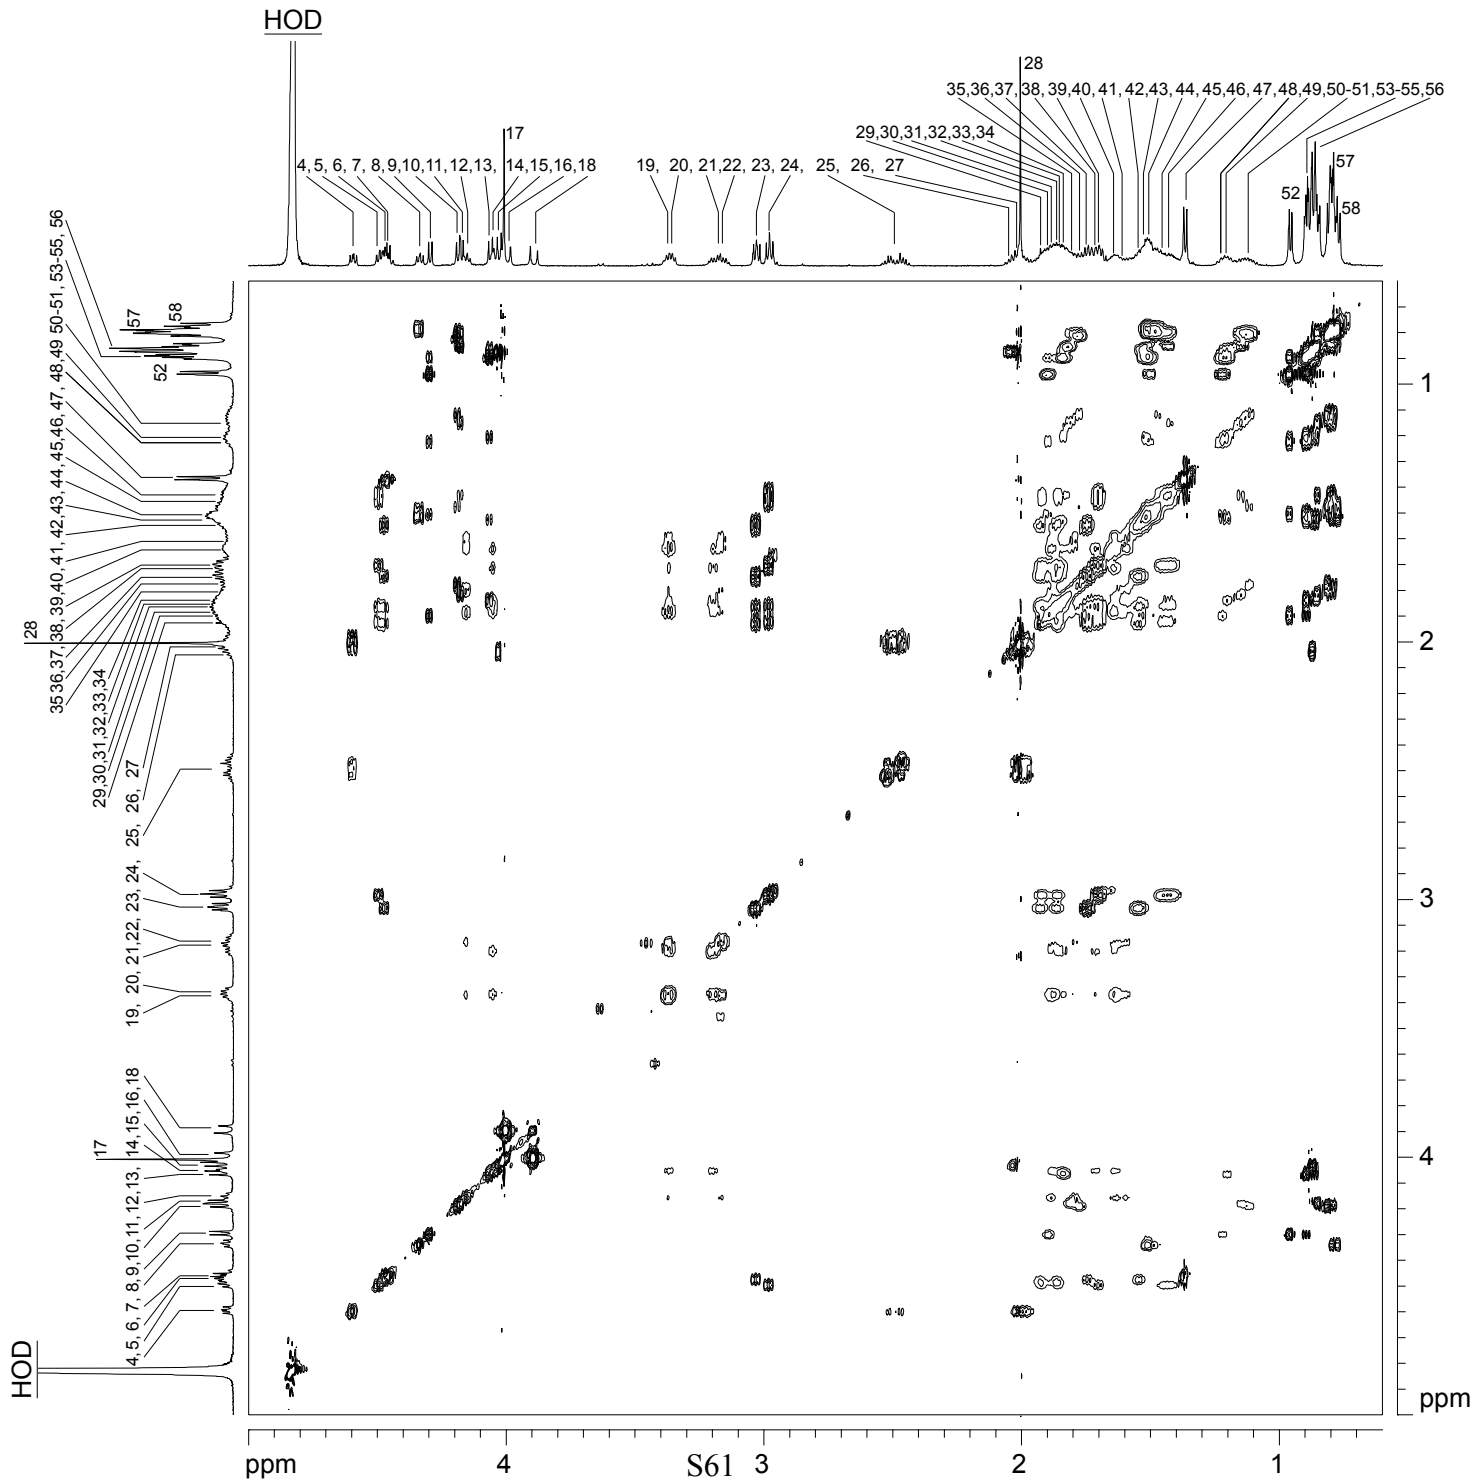

$^1\text{H}$  NMR 2D ROESY of macrocycle **1b** with presaturation suppression of the HOD peak  
1 mM in  $\text{D}_2\text{O}$  at 600 MHz and 293 K with 200-ms spin-lock mixing time

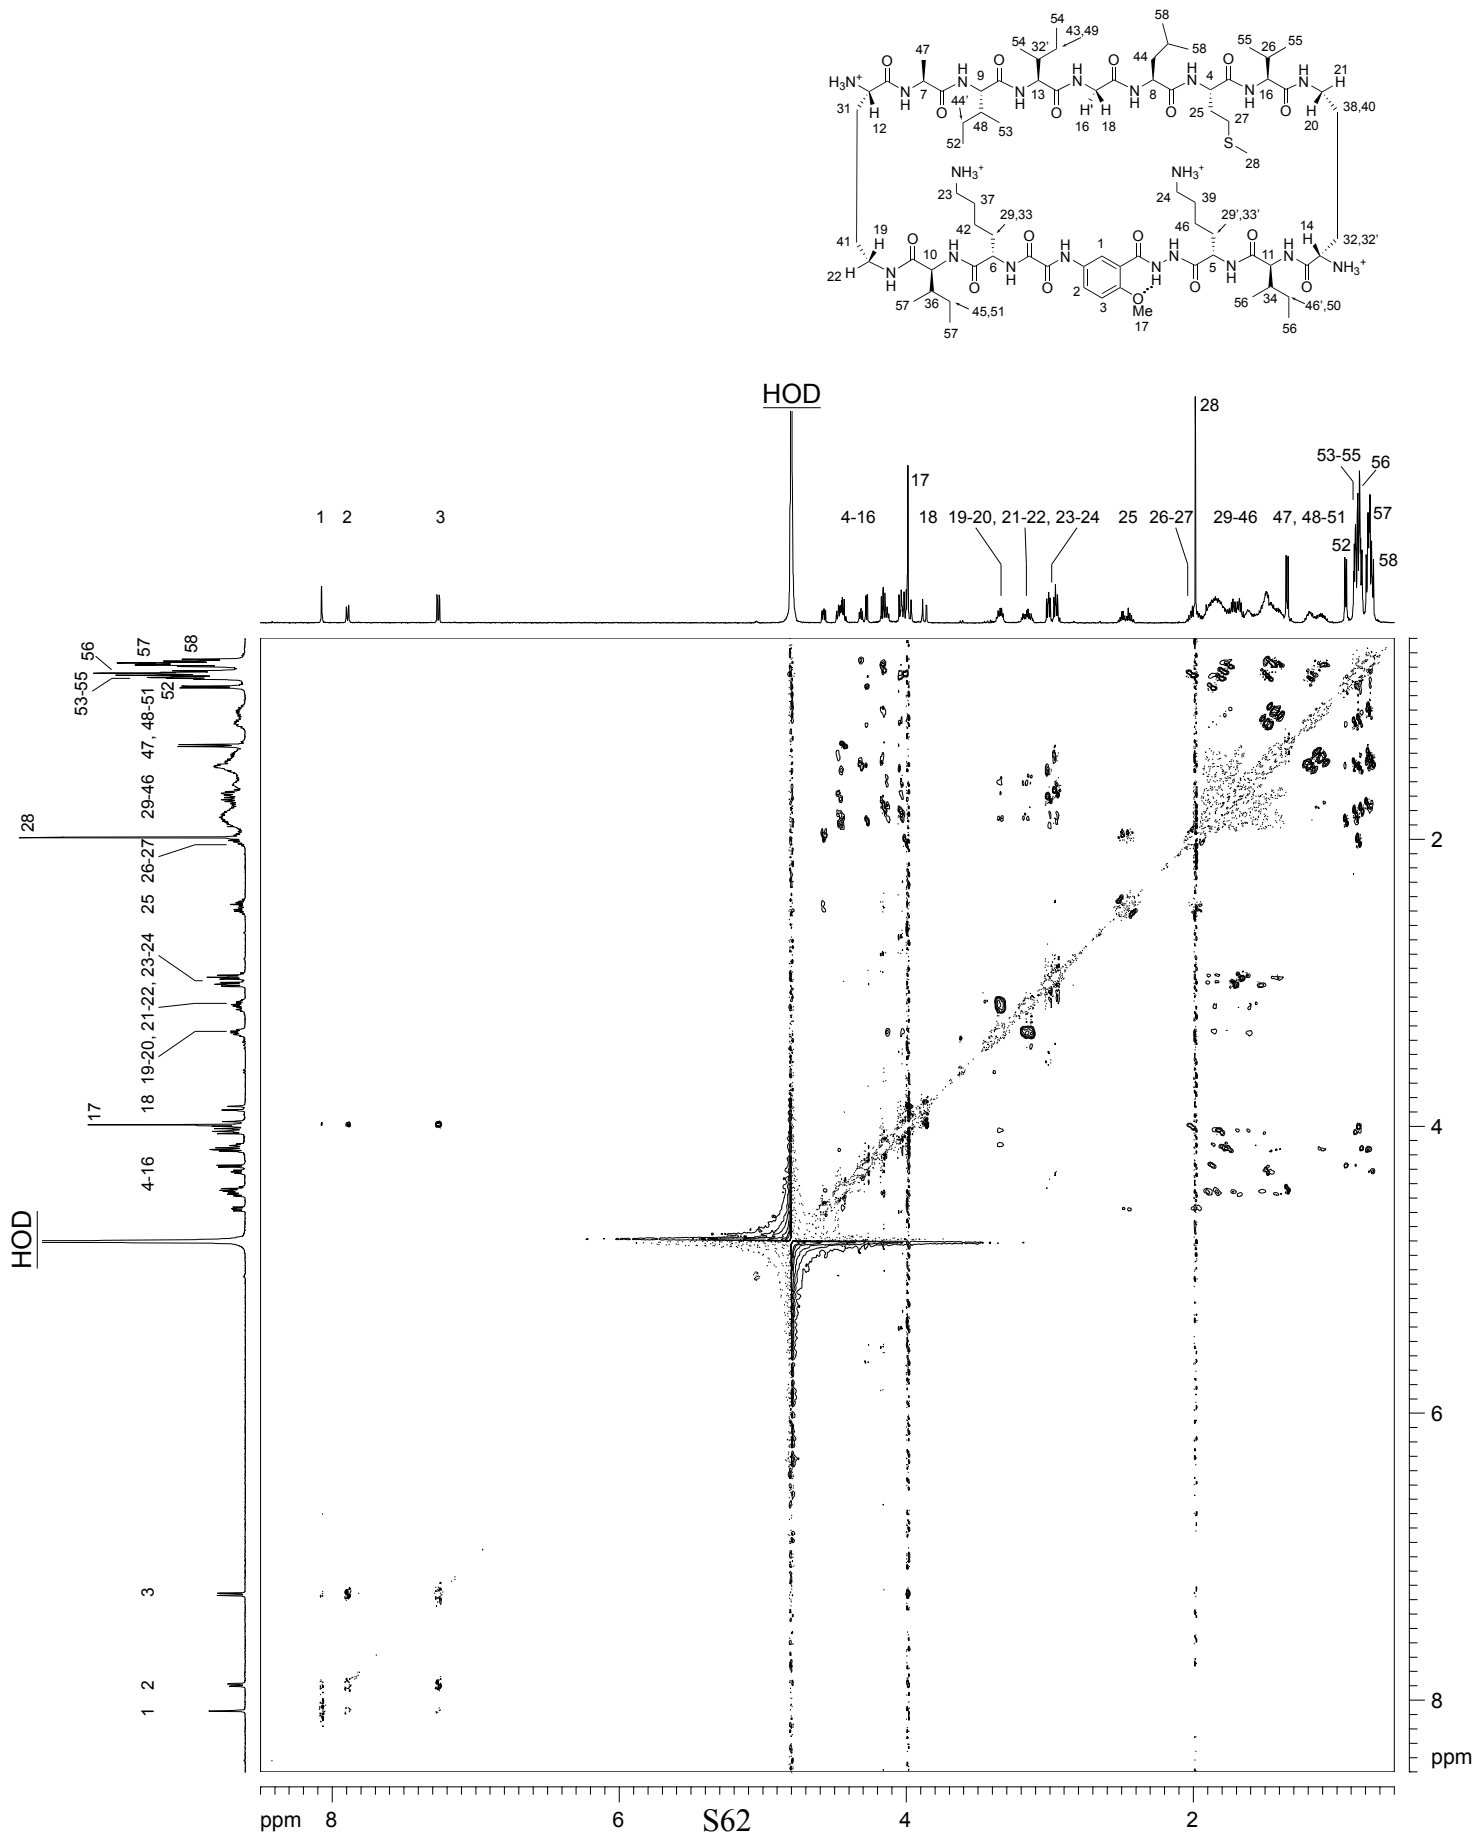

$^1\text{H}$  NMR 2D ROESY of macrocycle **1b** with presaturation suppression of the HOD peak  
1 mM in  $\text{D}_2\text{O}$  at 600 MHz and 293 K with 200-ms spin-lock mixing time

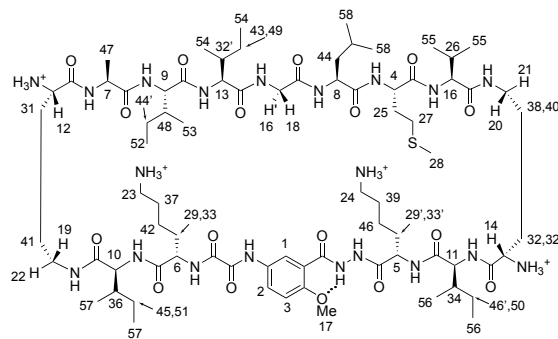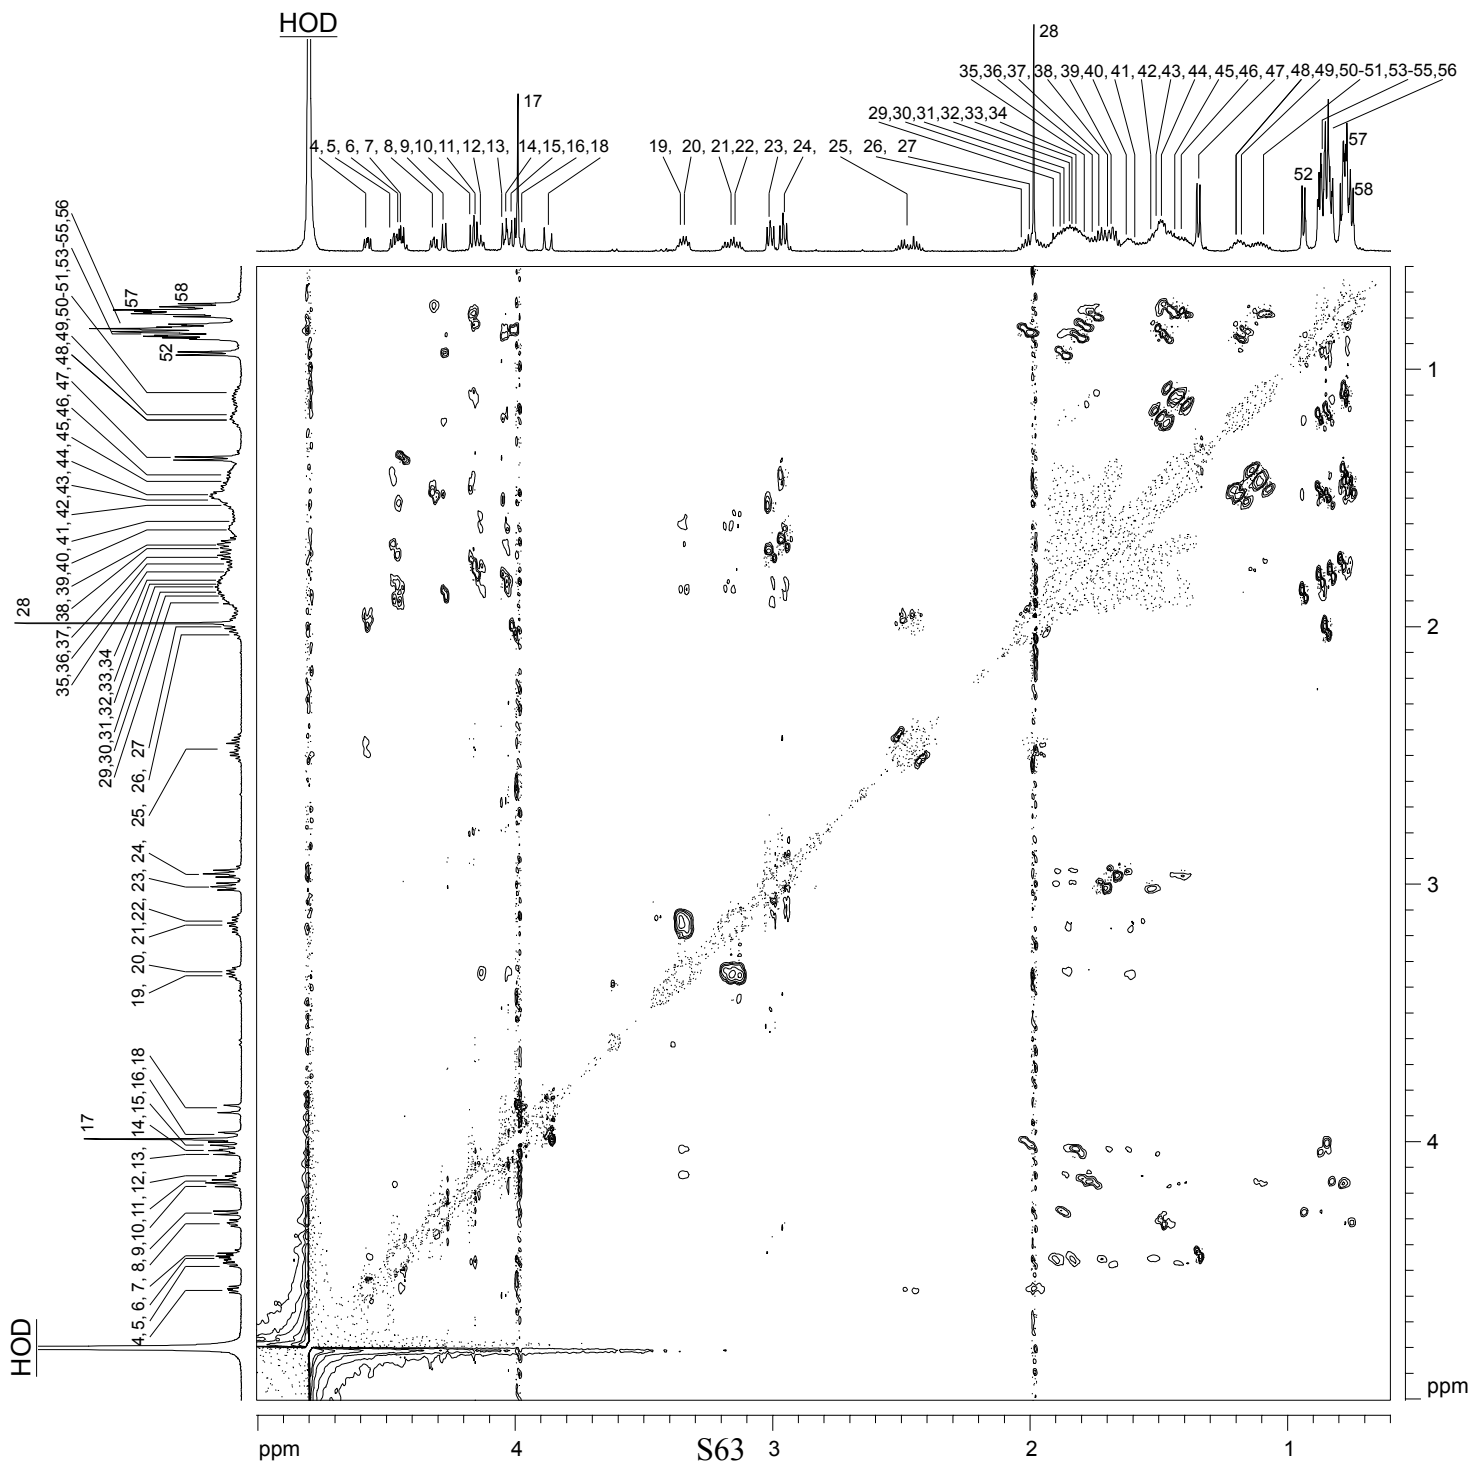

$^1\text{H}$  NMR DOSY of peptide **1b**, 1 mM in  $\text{D}_2\text{O}$  at 500 MHz and 298 K  
monomer predominates

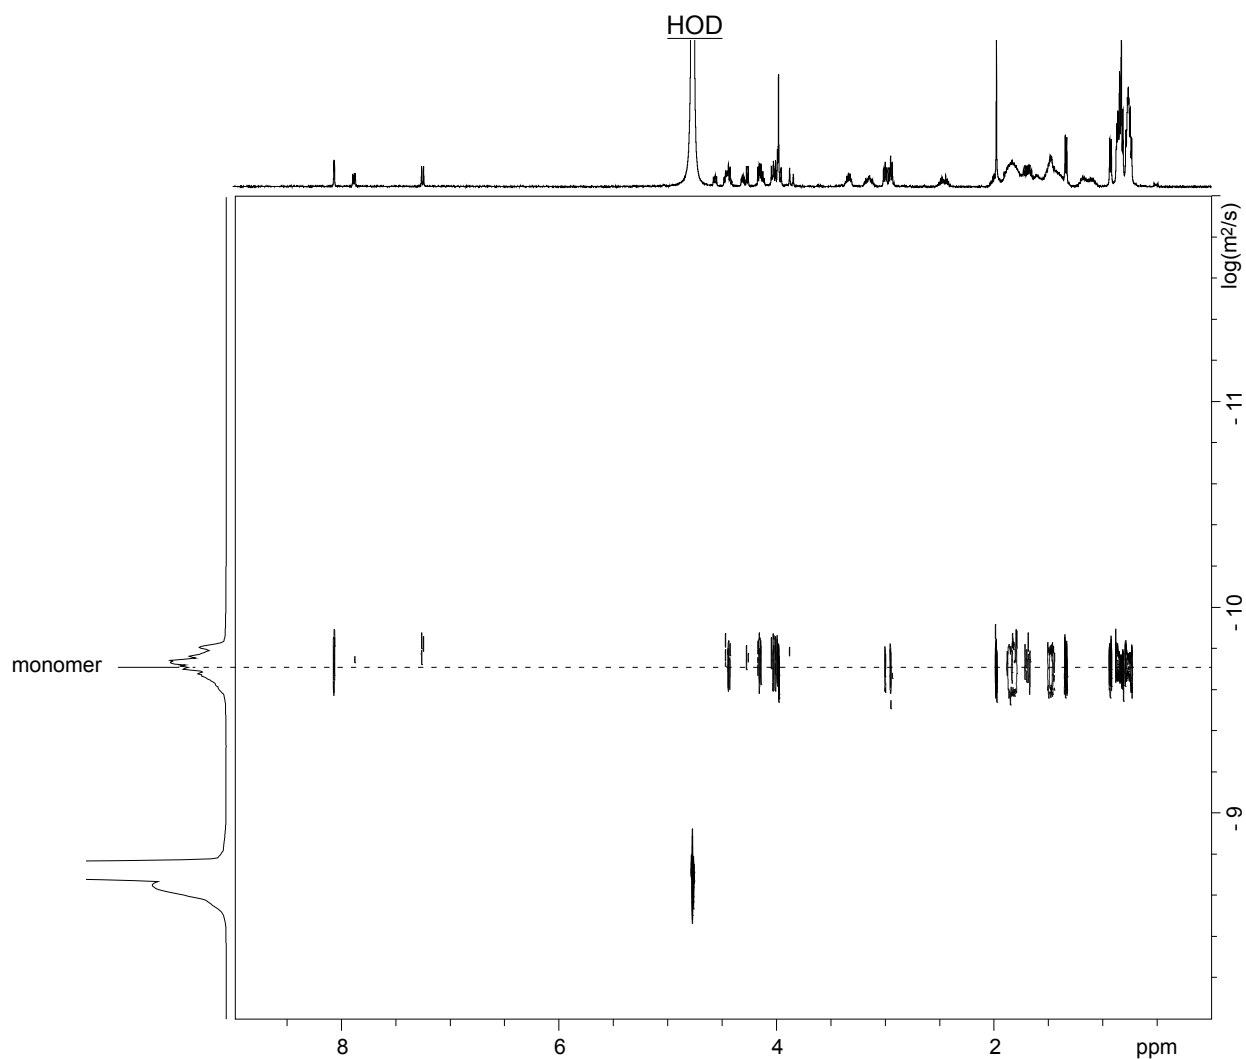

Calculations for peptide **1b** at 1.0 mM

$$D_{\text{HOD}} = 19.0 \times 10^{-10} \text{ m}^2/\text{s} \text{ }^a$$

$$\log(D_{\text{HOD}}) = -8.721$$

$$D_{\text{monomer}}: \log(D) = -9.712; D = 10^{-9.712} = 19.4 \pm 1.7 \times 10^{-11} \text{ m}^2/\text{s}$$

<sup>a</sup>Longworth, L. G. *J. Phys. Chem.* **1960**, *64*, 1914–1917.



**<sup>1</sup>H NMR of peptide 1b, 16 mM in D<sub>2</sub>O at 600 MHz and 293 K**

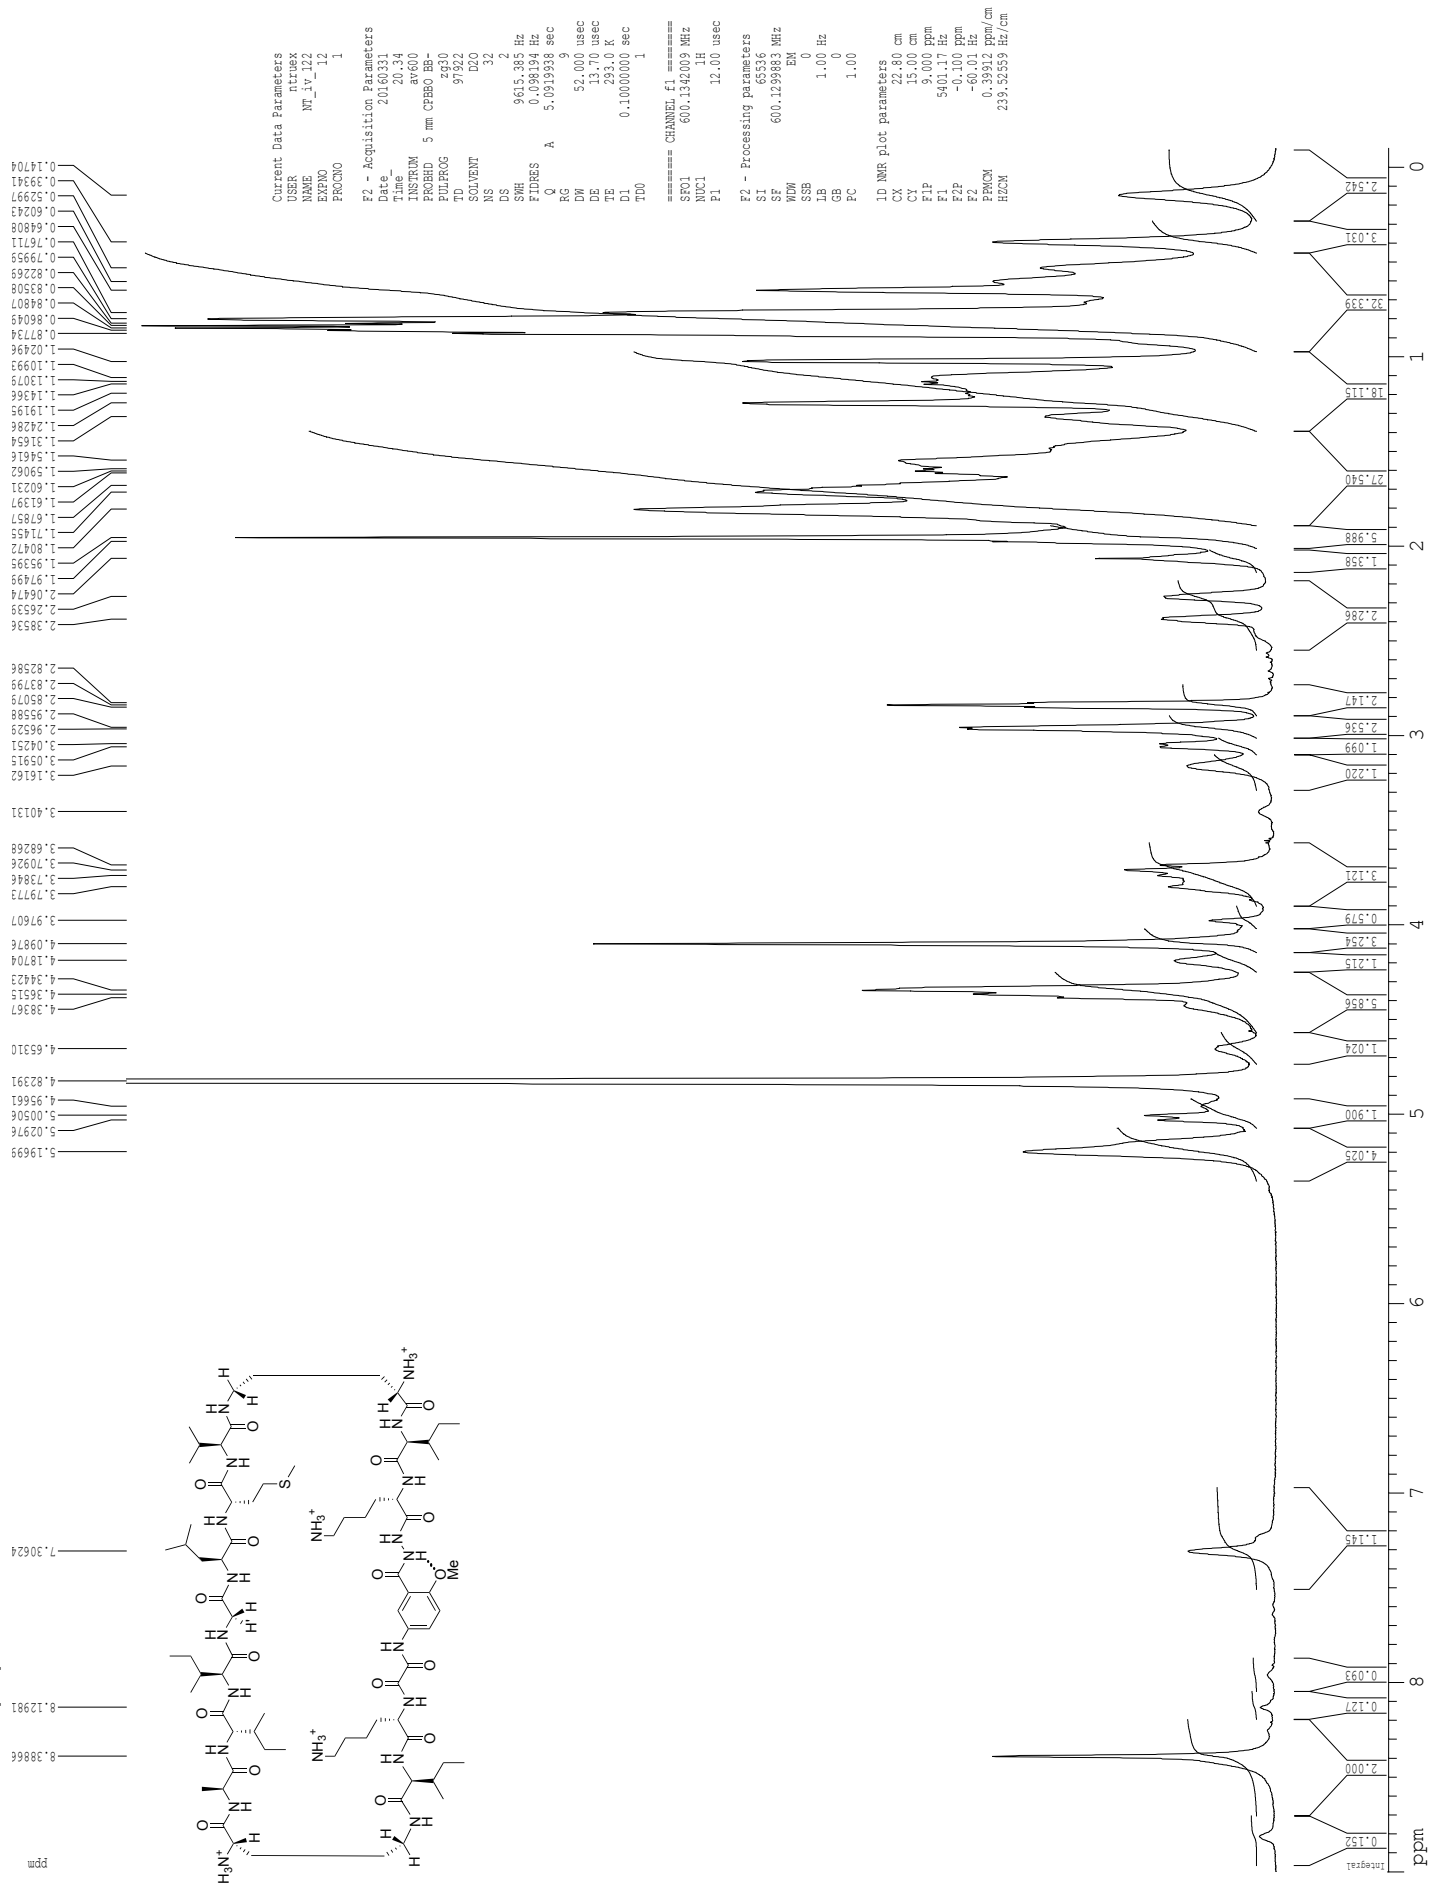

<sup>1</sup>H NMR of peptide **1b**, 16 mM in D<sub>2</sub>O at 600 MHz and 293 K

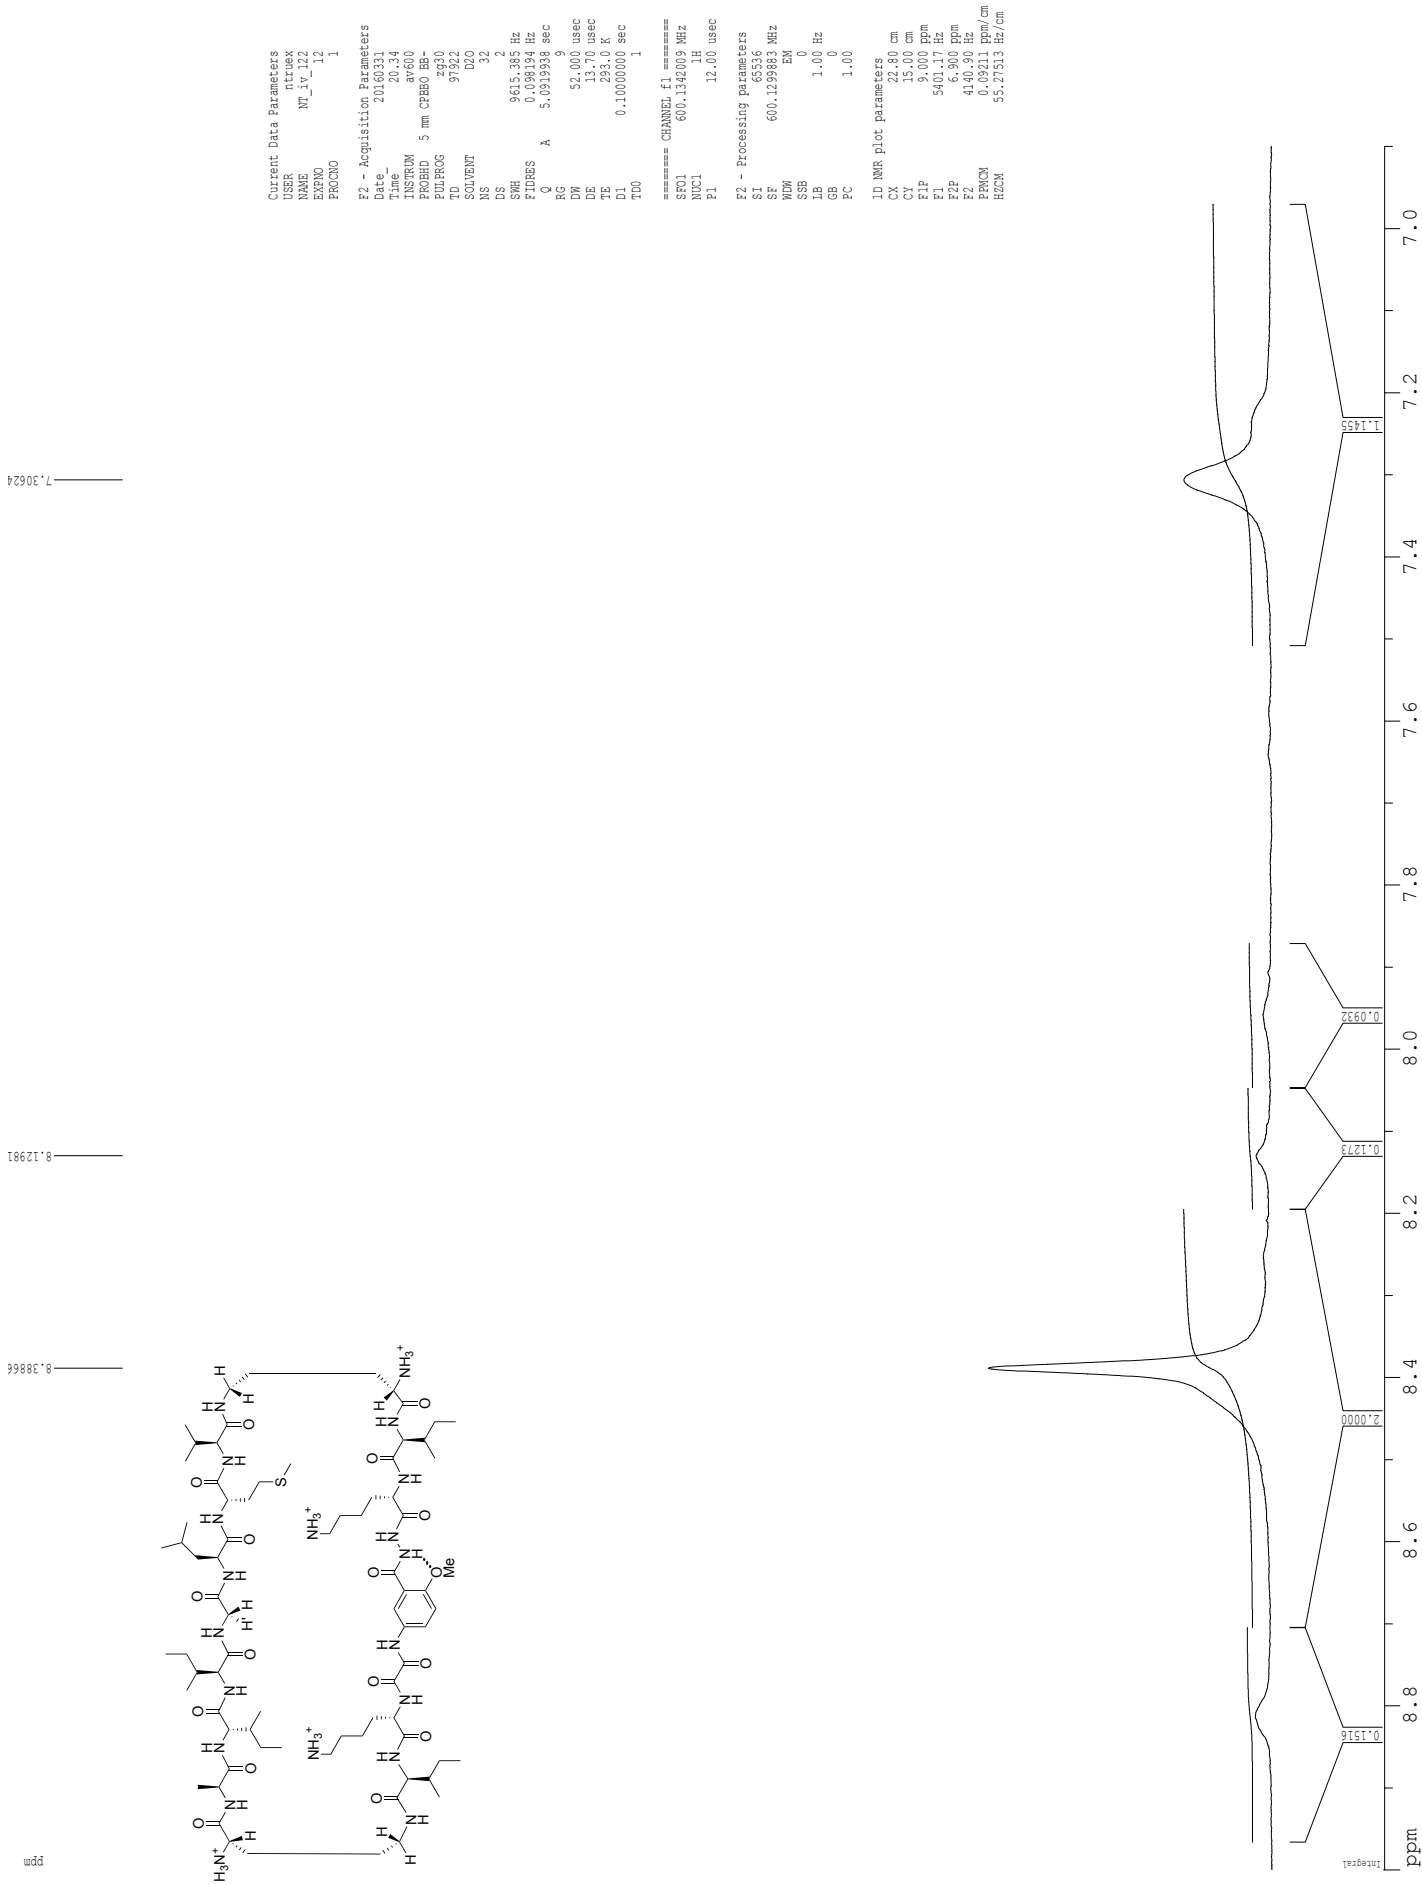

<sup>1</sup>H NMR of peptide **1b**, 16 mM in D<sub>2</sub>O at 600 MHz and 293 K

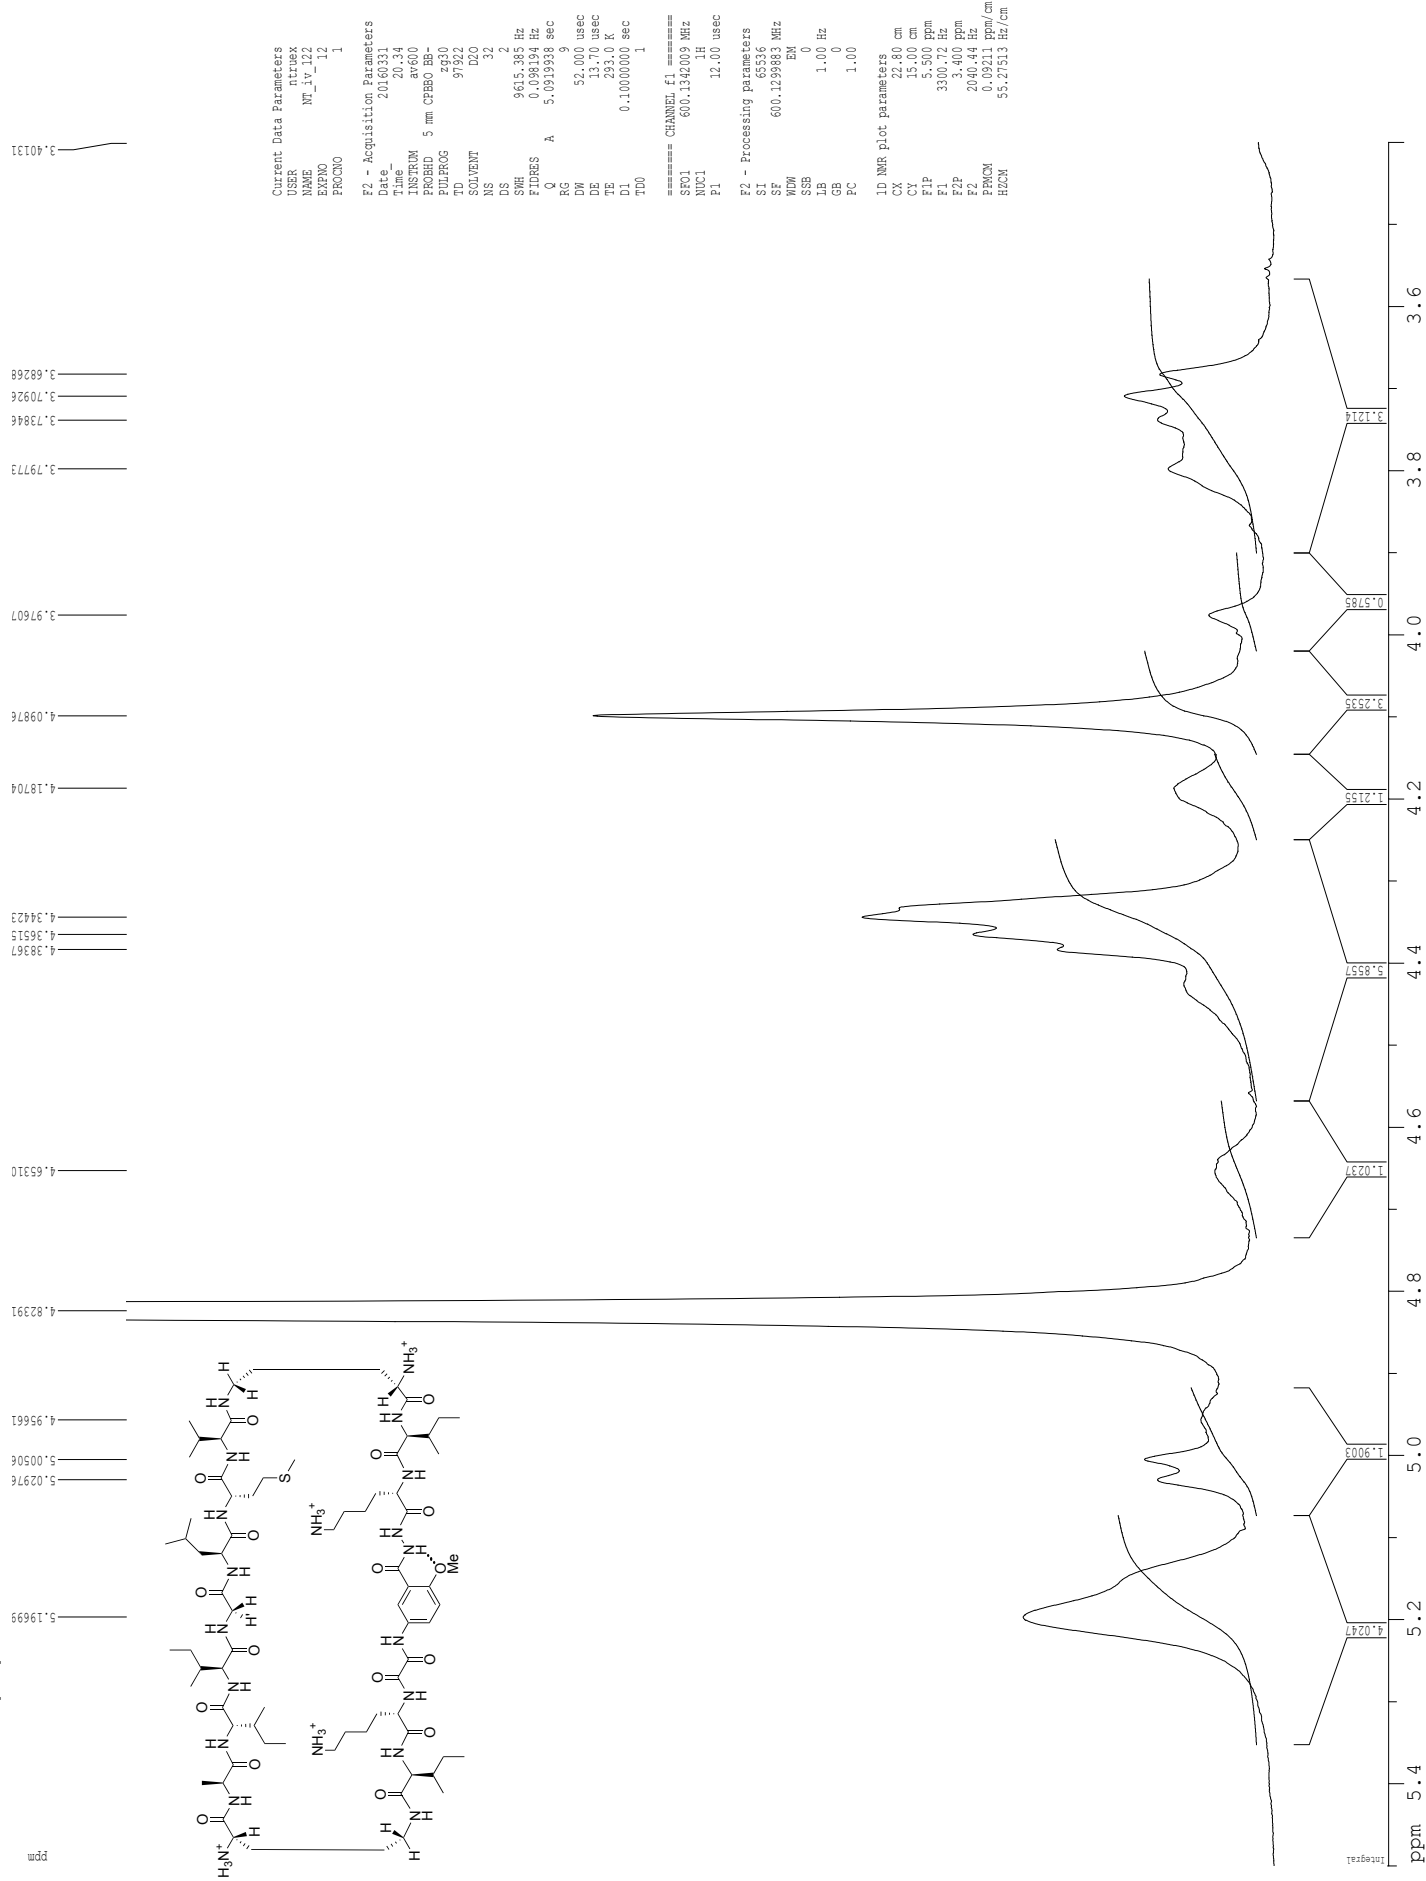

**<sup>1</sup>H NMR of peptide 1b, 16 mM in D<sub>2</sub>O at 600 MHz and 293 K**

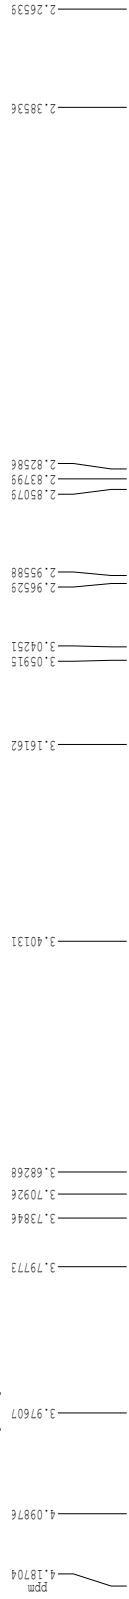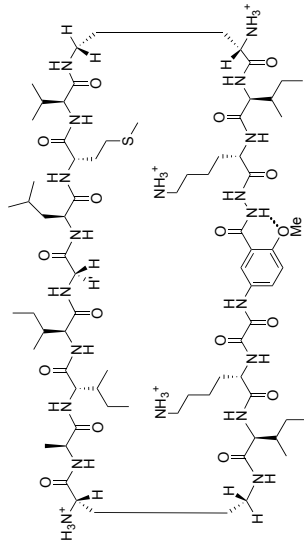

```

Current Data Parameters
USER          ntrux
NAME         NT_1v_122
EXPNO        12
PROCNO       1

F2 - Acquisition Parameters
Date_        2016031
Time         20.34
INSTRUM     av600
PROBHD      5 mm CPBBO ERD
PULPROG     zgpg30
TD           97320
SOLVENT     D2O
NS           32
DS           2
SWH          9615.385 Hz
FIDRES      0.099194 Hz
AQ          5.0919238 sec
RG           9
WDW          EM
SSB          0
LB           1.00 Hz
GB           0
PC           1.00

===== CHANNEL f1 =====
SFO1        600.132003 MHz
NUC1
P1          12.00 usec

F2 - Processing parameters
SI          65536
SF          600.1299883 MHz
WDW         EM
SSB         0
LB          1.00 Hz
GB          0
PC          1.00

1D NMR plot parameters
CX          22.80 cm
CY          15.00 cm
FP          4.200 ppm
FL          2520.35 Hz
F2          12.210 ppm
F3          0.69211 Hz/cm
PCWDW      55.27513 Hz/cm
HECN
    
```

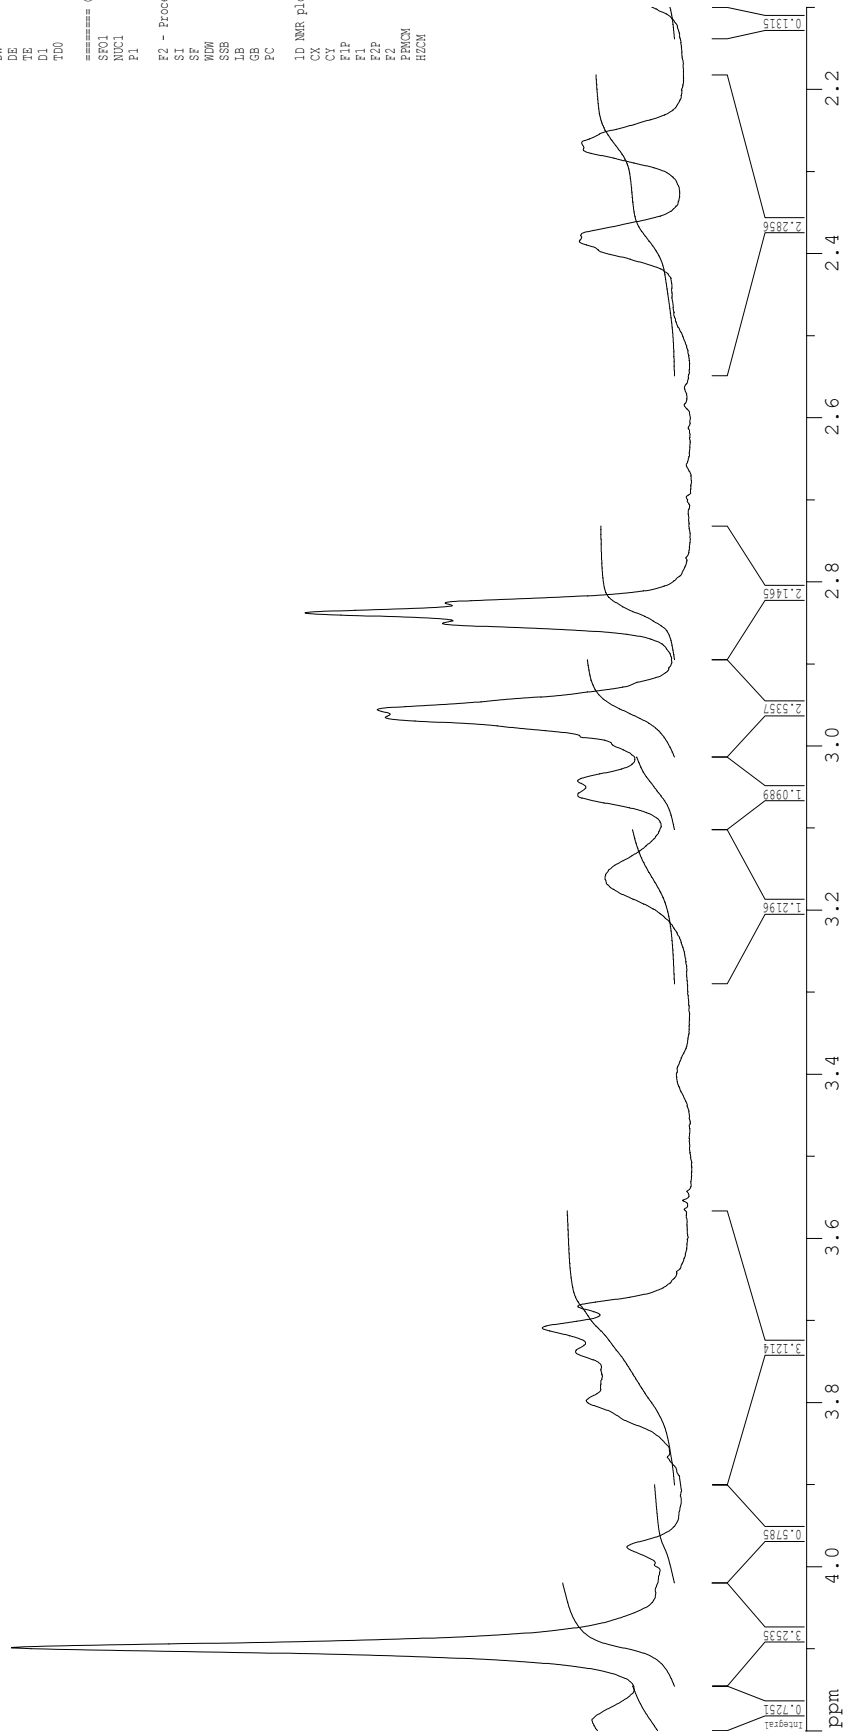

**<sup>1</sup>H NMR of peptide 1b, 16 mM in D<sub>2</sub>O at 600 MHz and 293 K**

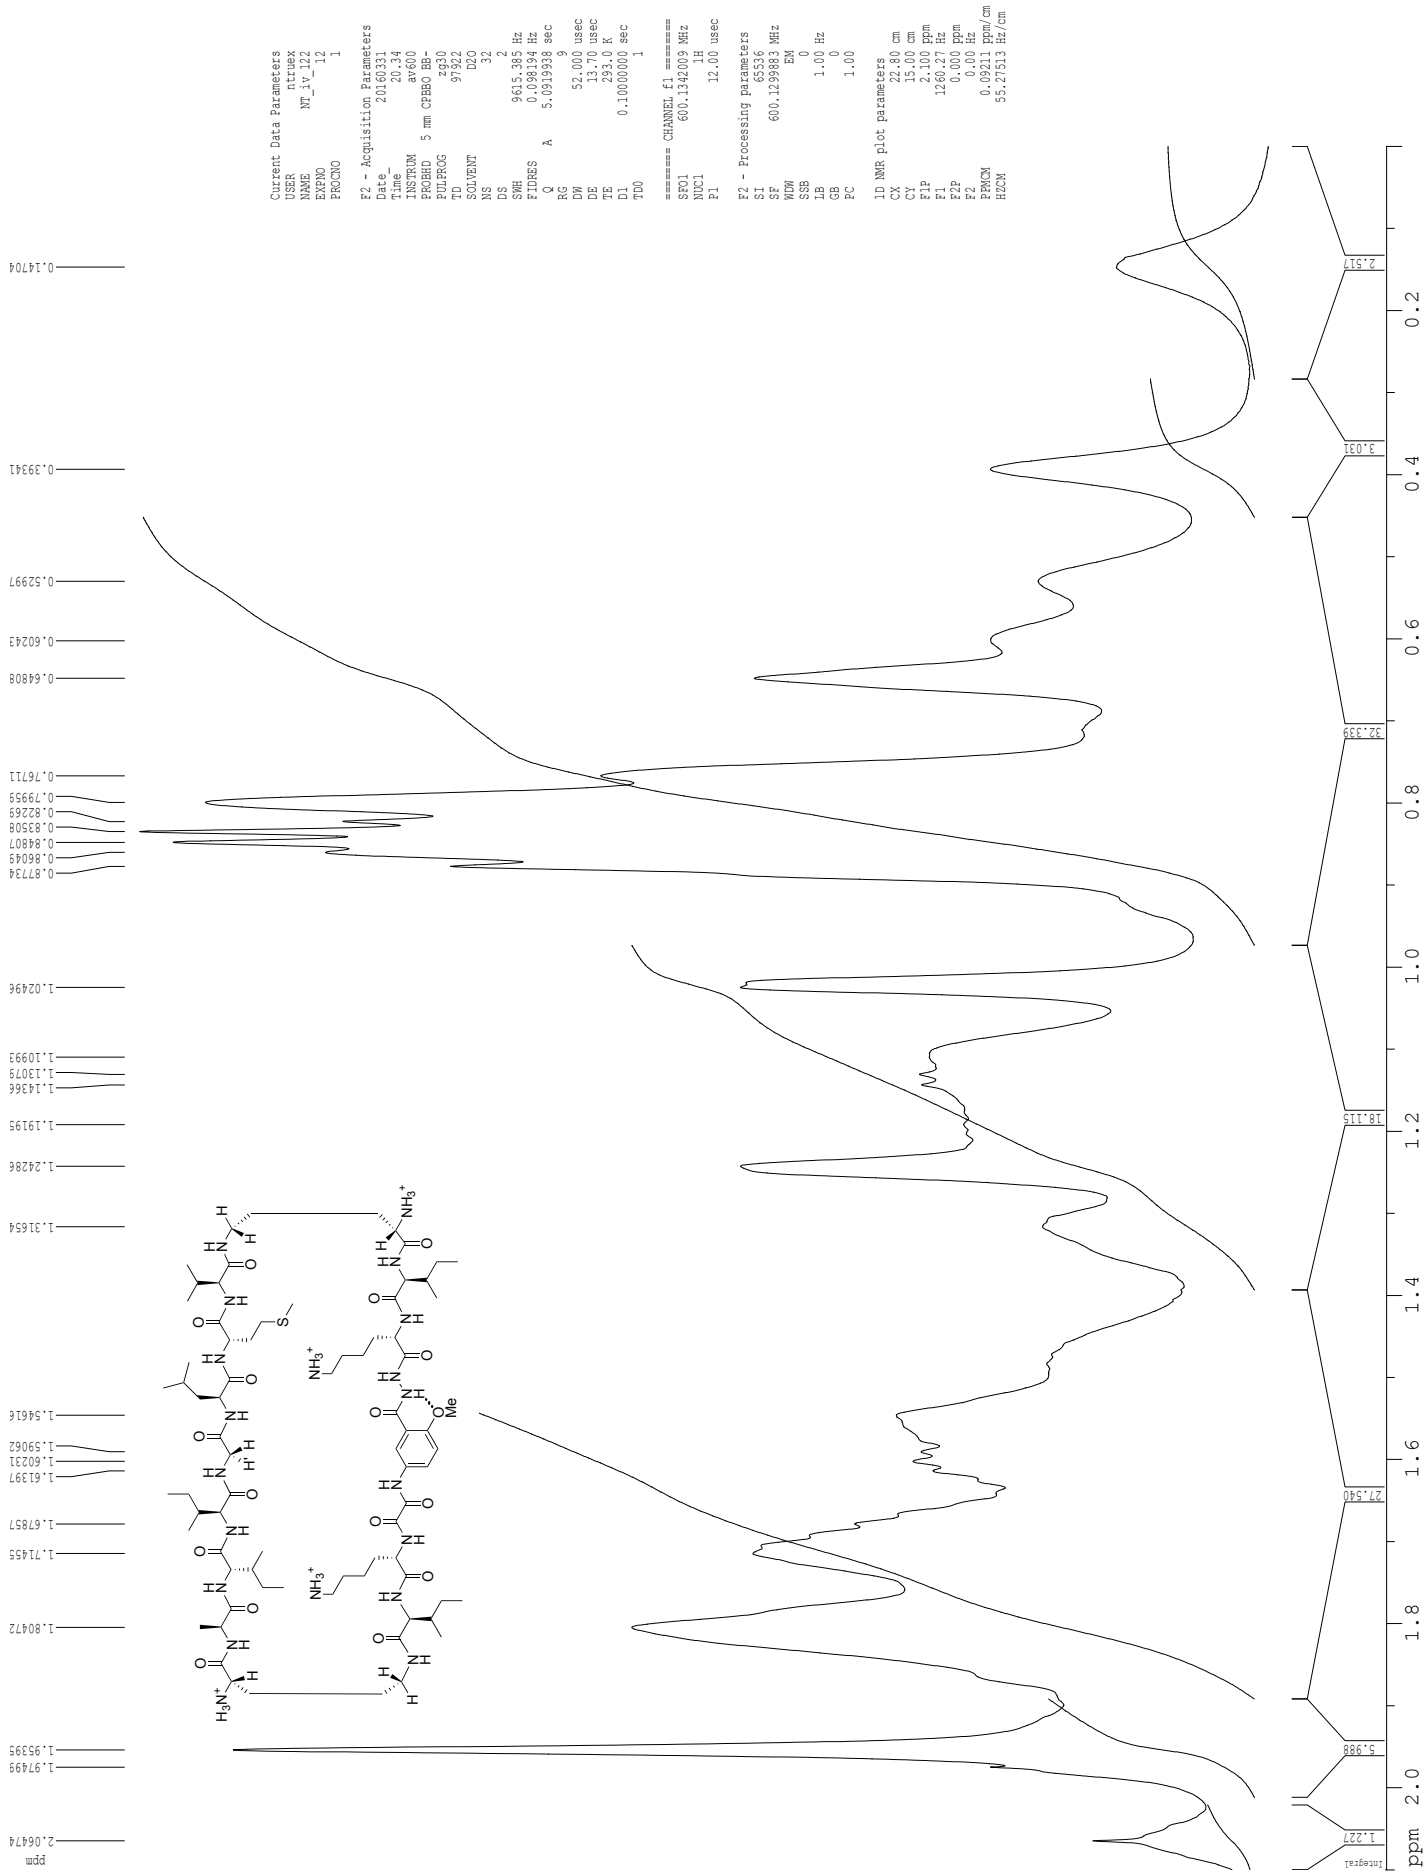

<sup>1</sup>H NMR 2D TOCSY of macrocycle **1b** with presaturation suppression of the HOD peak  
16 mM in D<sub>2</sub>O at 600 MHz and 293 K with 150-ms spin-lock mixing time

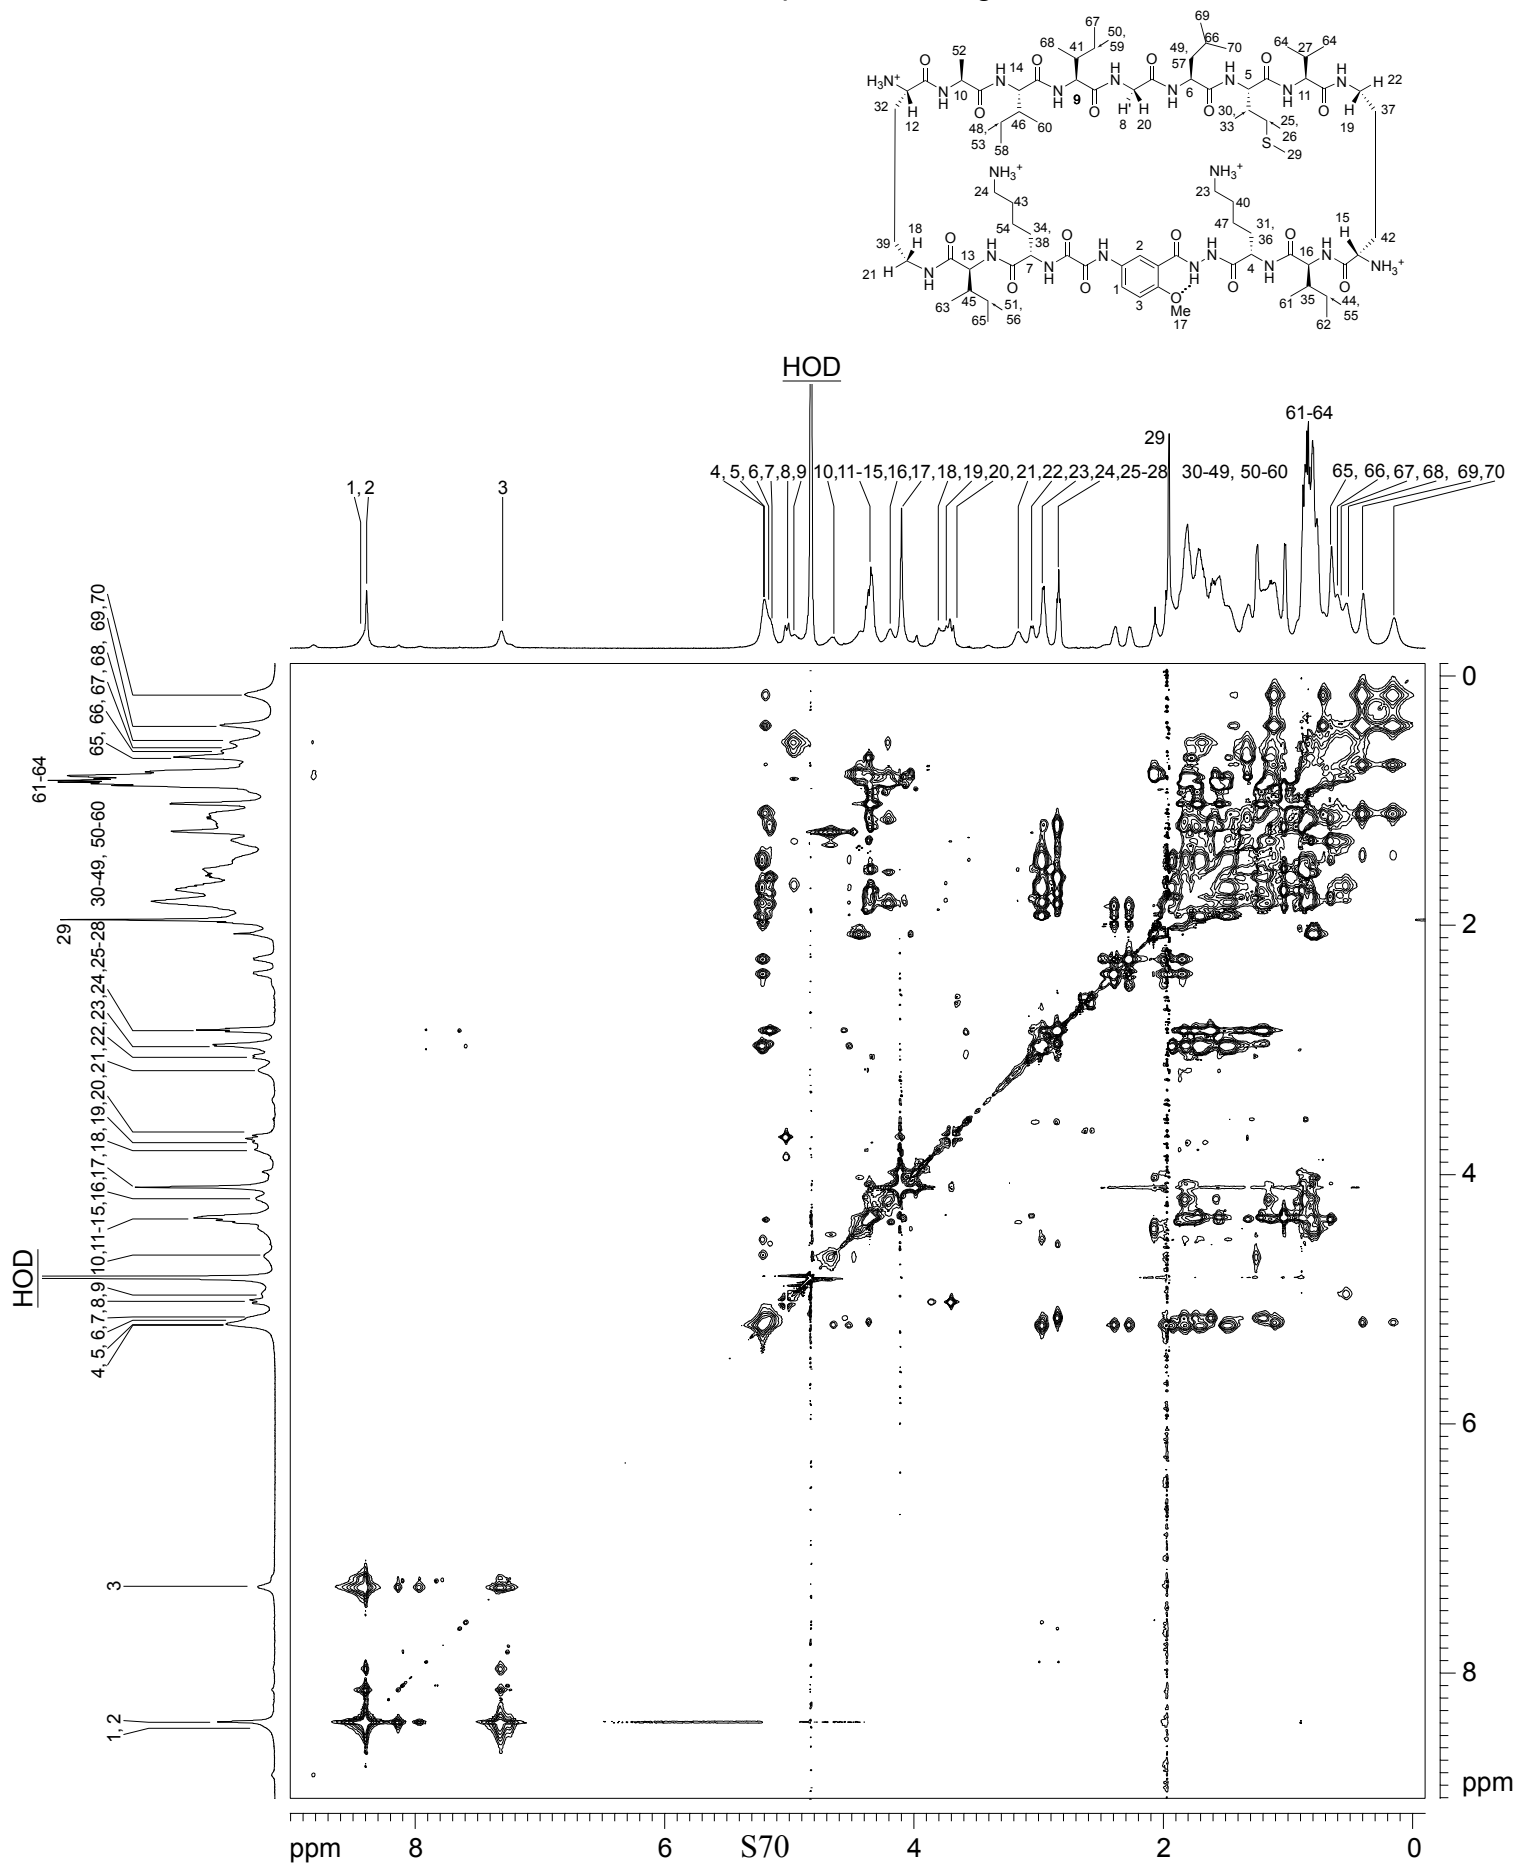

$^1\text{H}$  NMR 2D TOCSY of macrocycle **1b** with presaturation suppression of the HOD peak  
16 mM in  $\text{D}_2\text{O}$  at 600 MHz and 293 K with 150-ms spin-lock mixing time

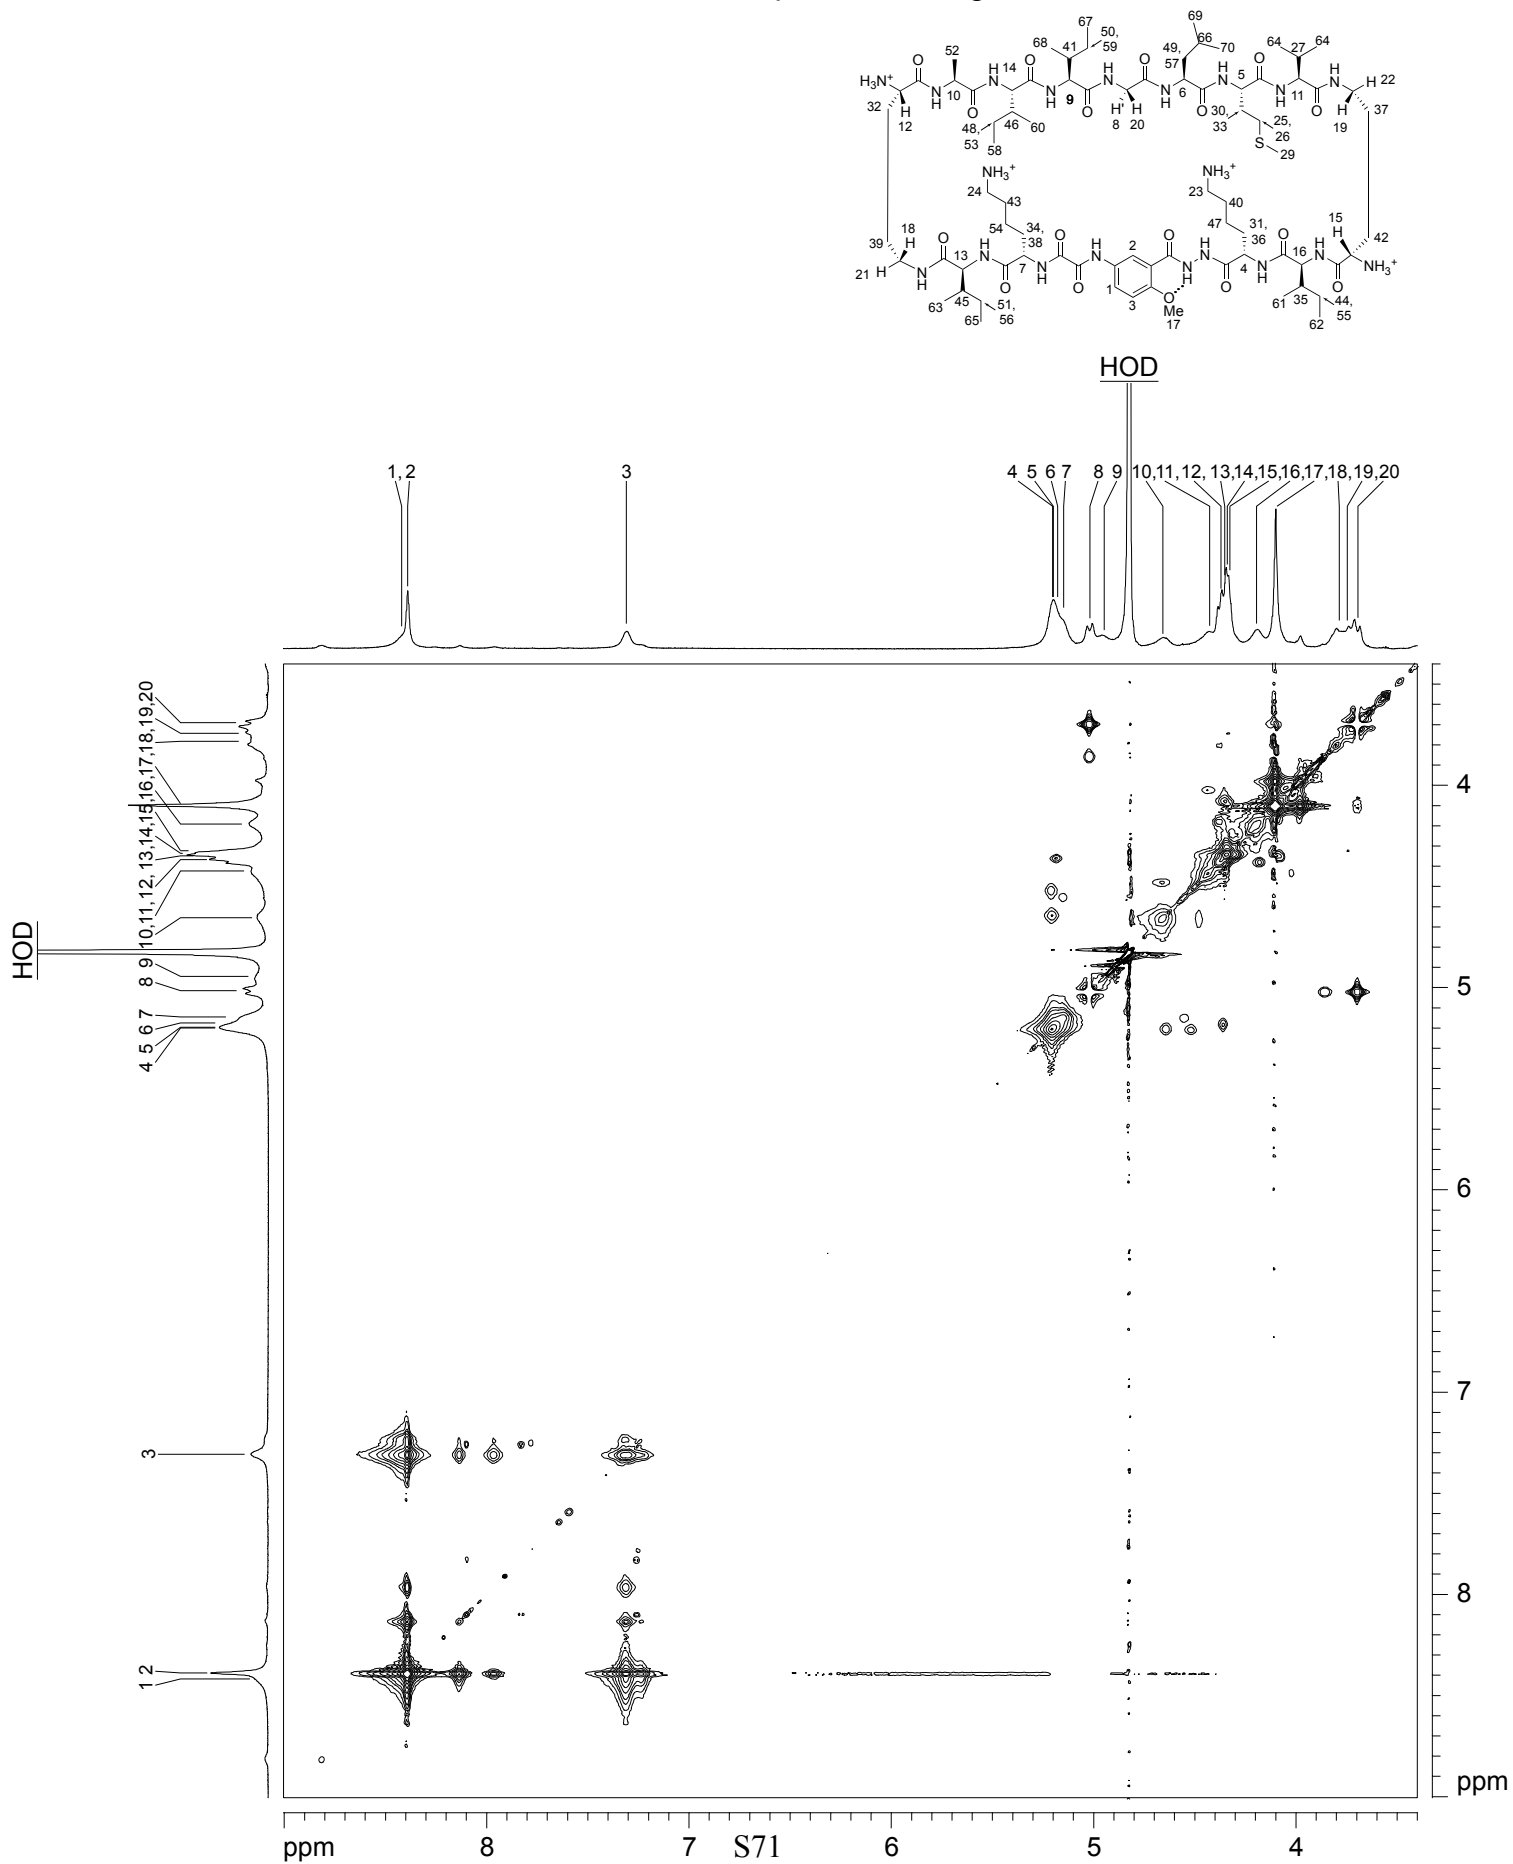

<sup>1</sup>H NMR 2D TOCSY of macrocycle **1b** with presaturation suppression of the HOD peak  
16 mM in D<sub>2</sub>O at 600 MHz and 293 K with 150-ms spin-lock mixing time

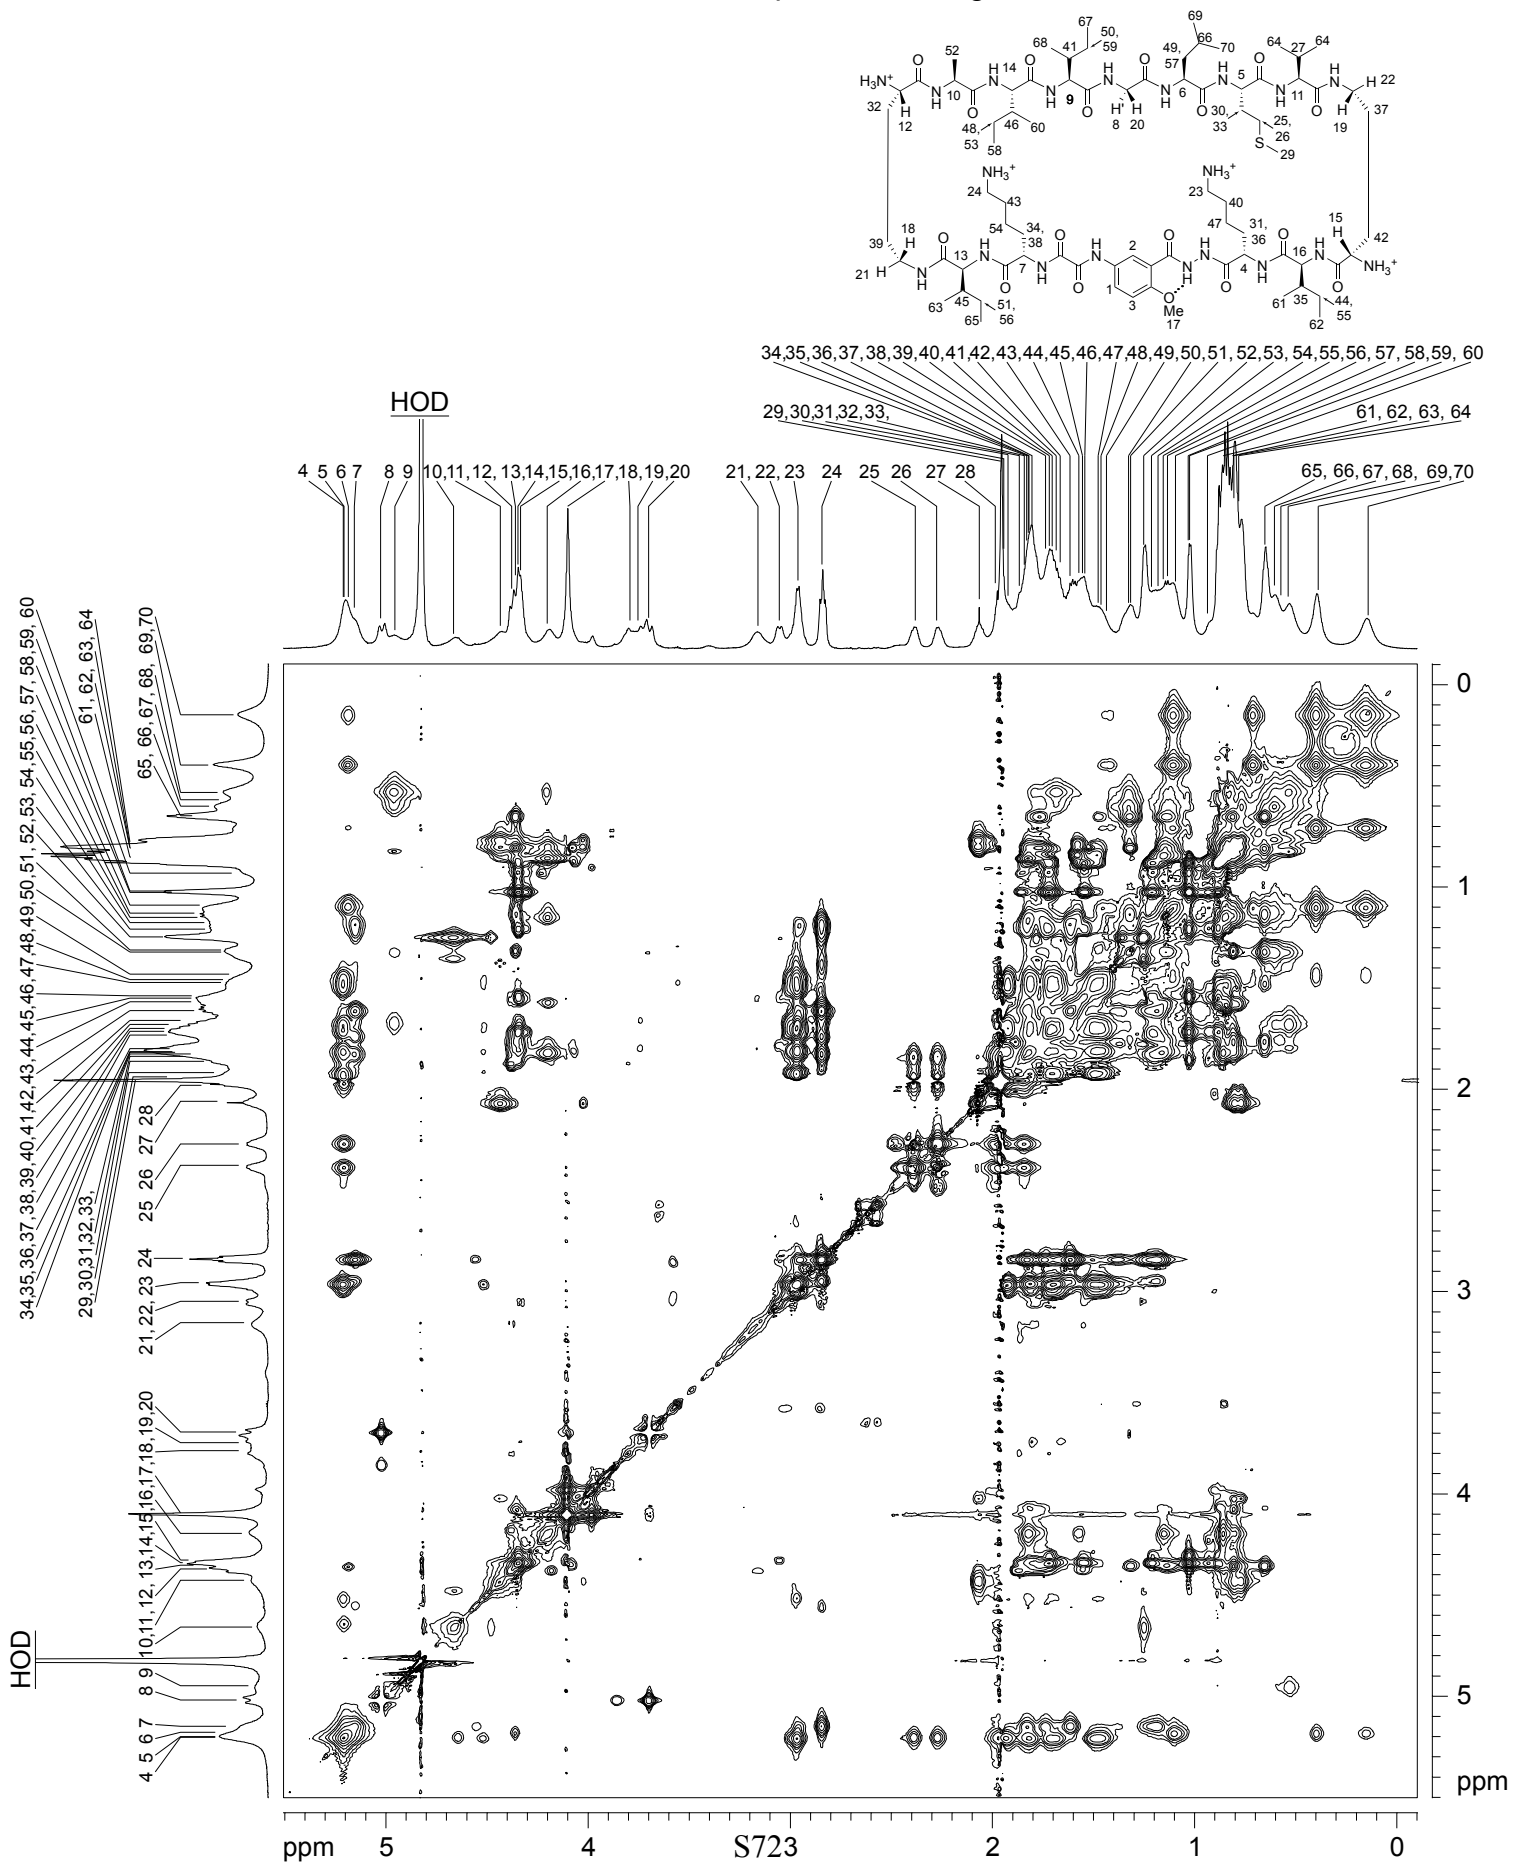



<sup>1</sup>H NMR 2D NOESY of macrocycle **1b** with presaturation suppression of the HOD peak  
16 mM in D<sub>2</sub>O at 600 MHz and 293 K with 150-ms mixing time

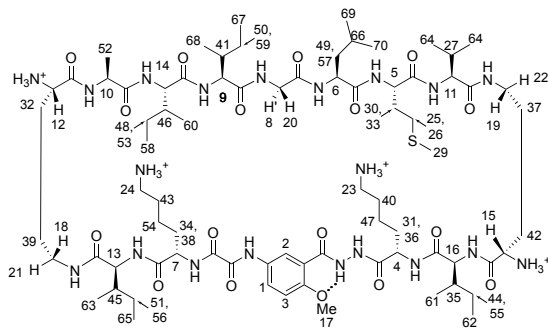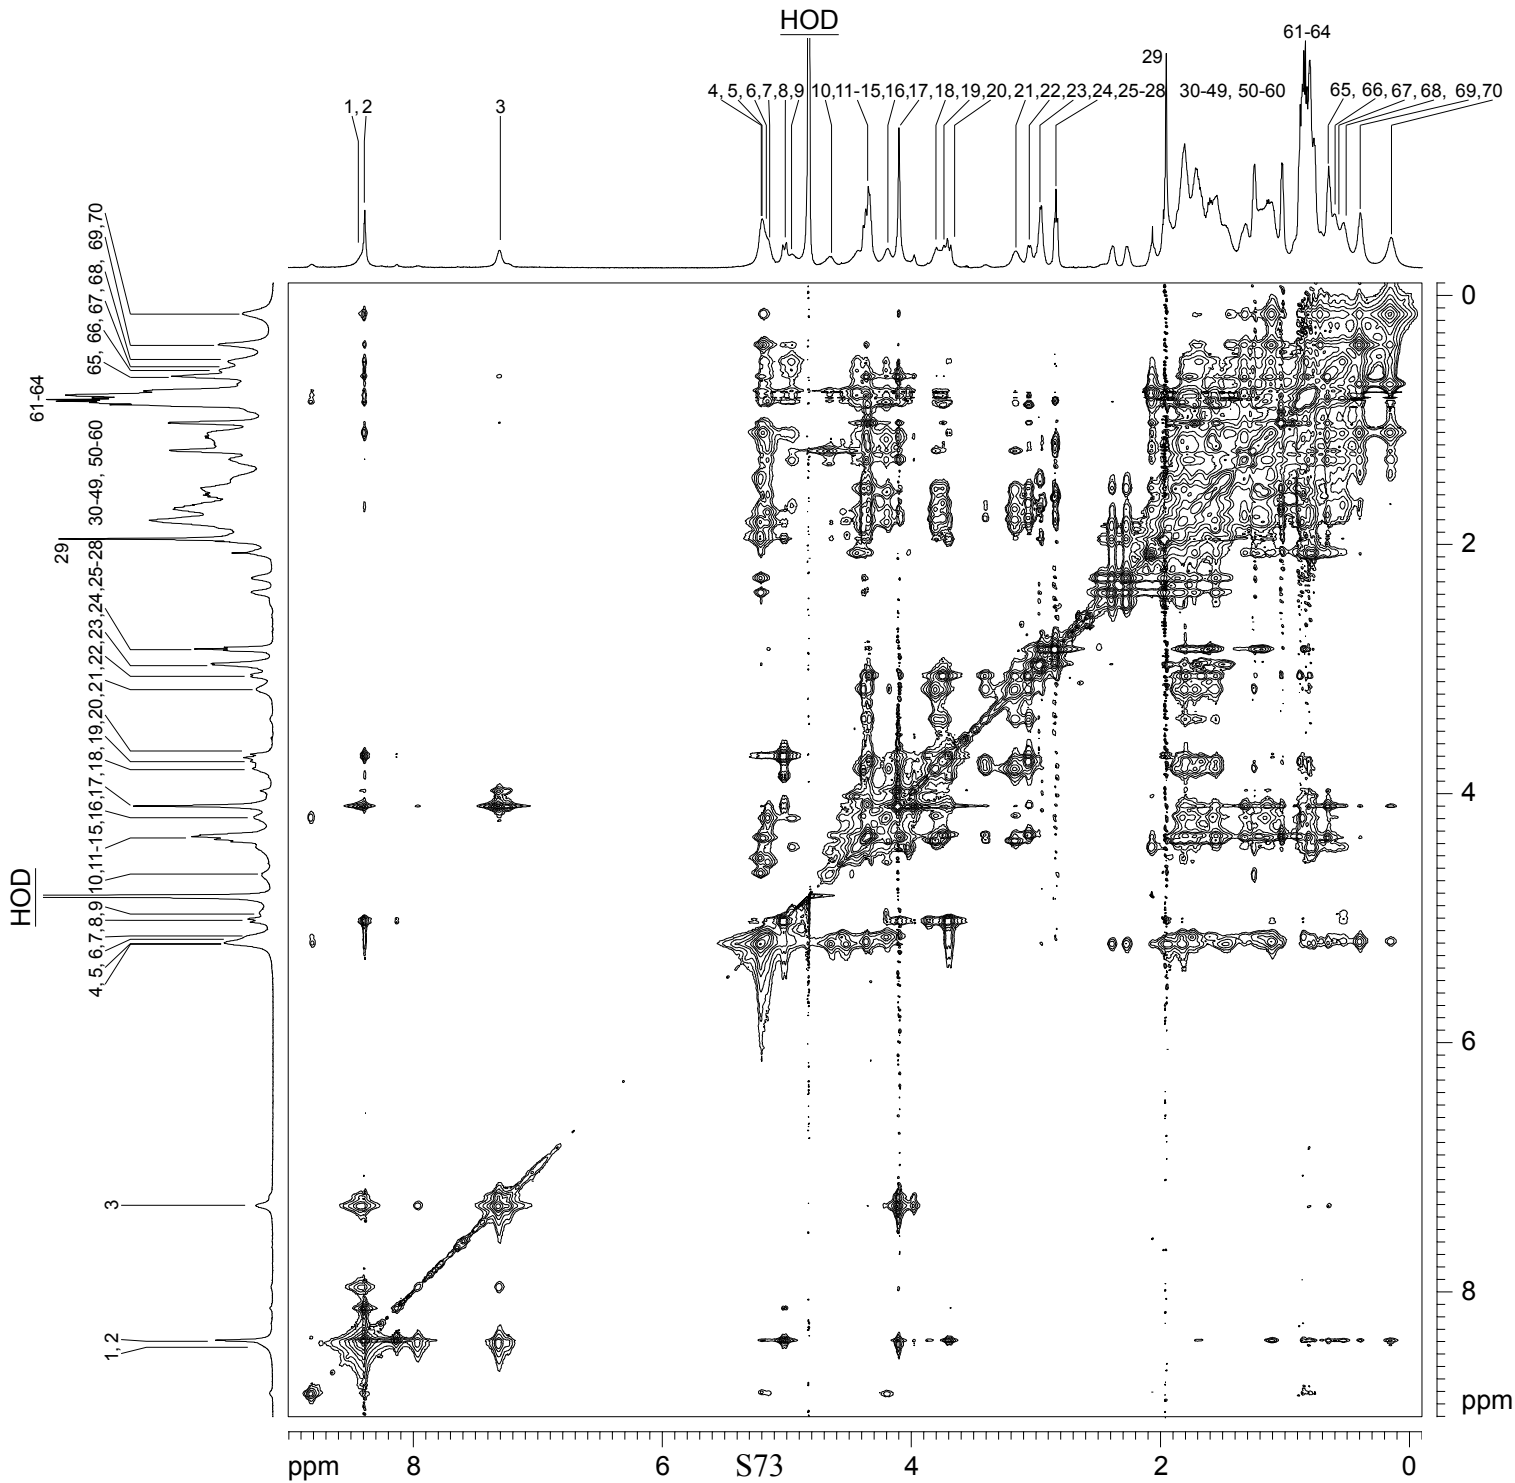

<sup>1</sup>H NMR 2D NOESY of macrocycle **1b** with presaturation suppression of the HOD peak  
16 mM in D<sub>2</sub>O at 600 MHz and 293 K with 150-ms mixing time

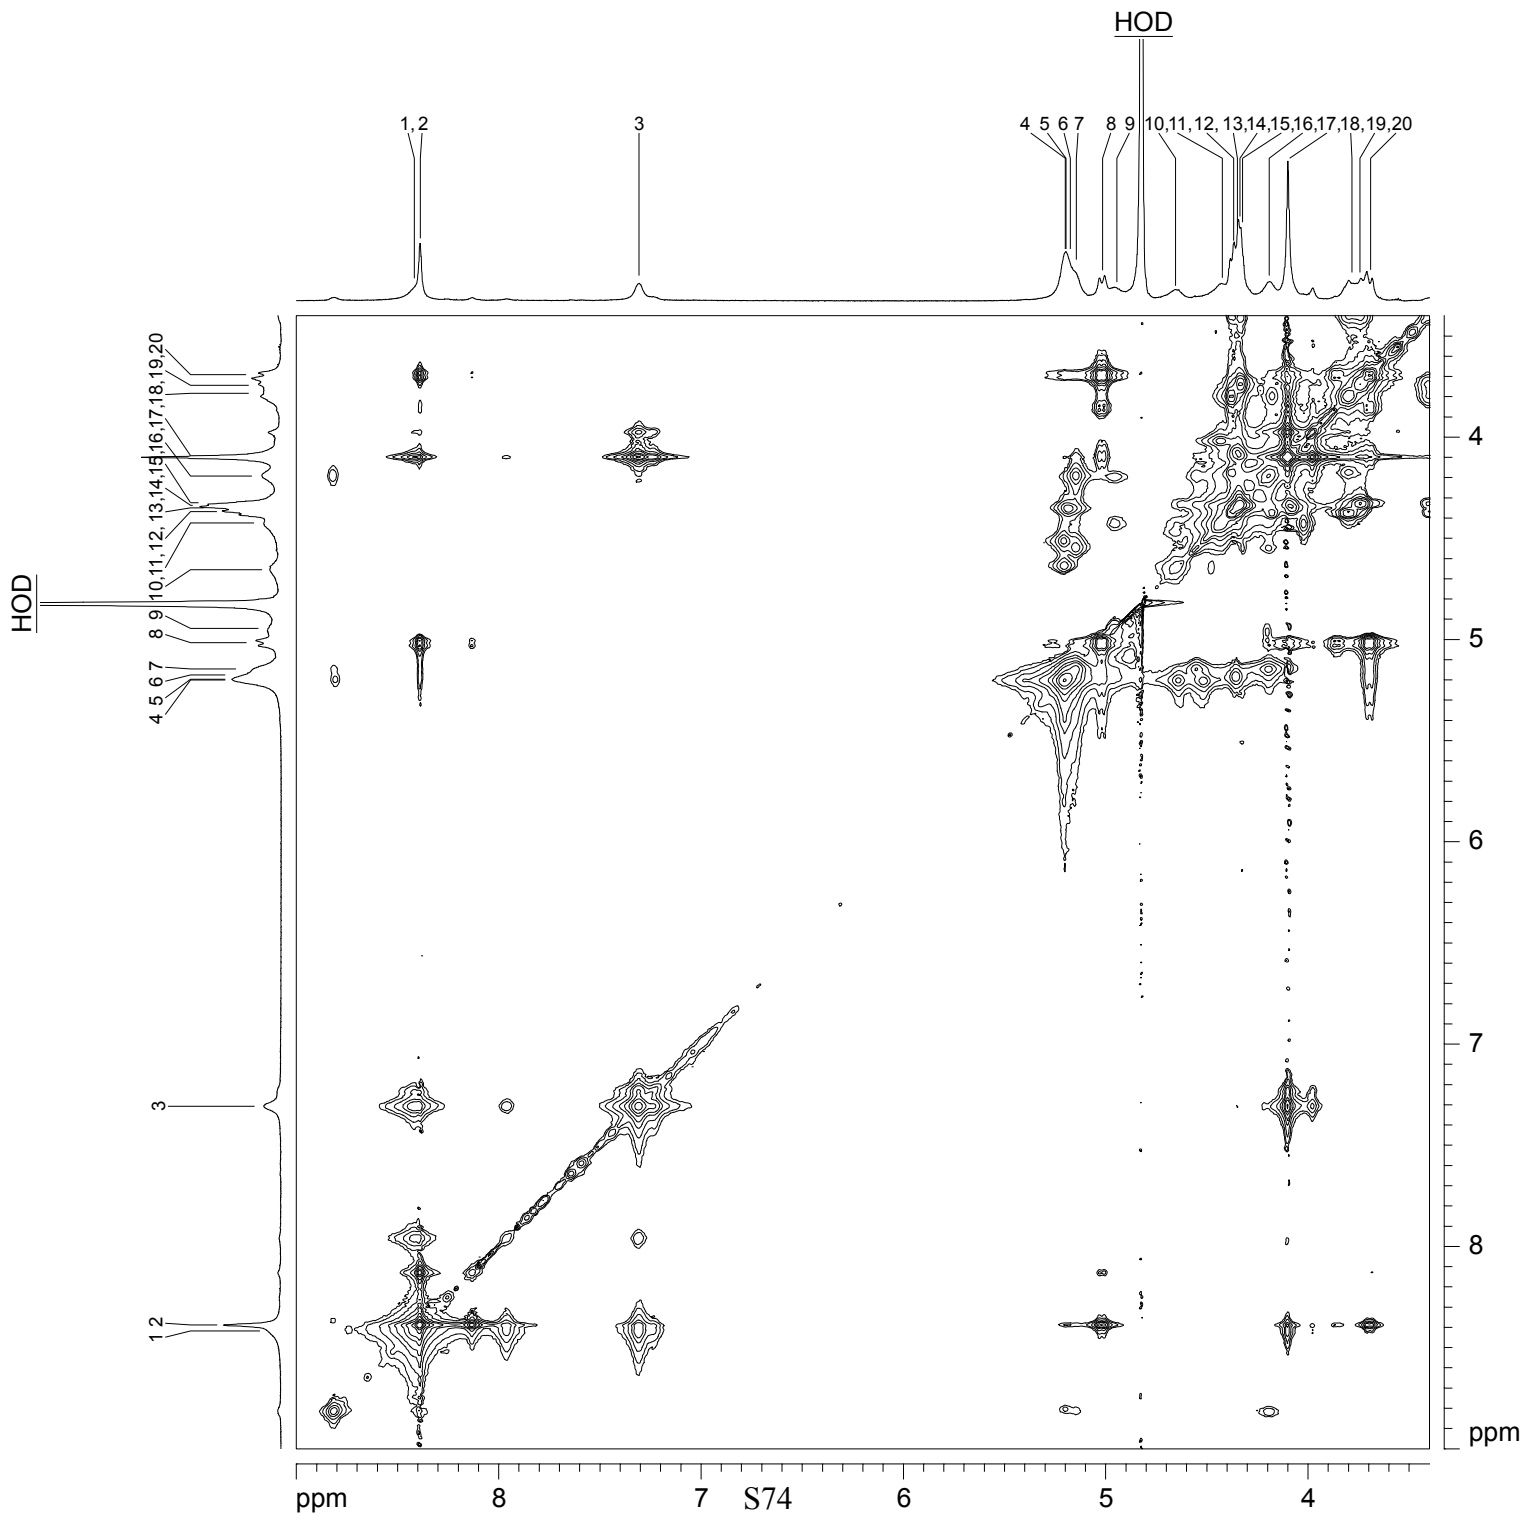

<sup>1</sup>H NMR 2D NOESY of macrocycle **1b** with presaturation suppression of the HOD peak  
16 mM in D<sub>2</sub>O at 600 MHz and 293 K with 150-ms mixing time

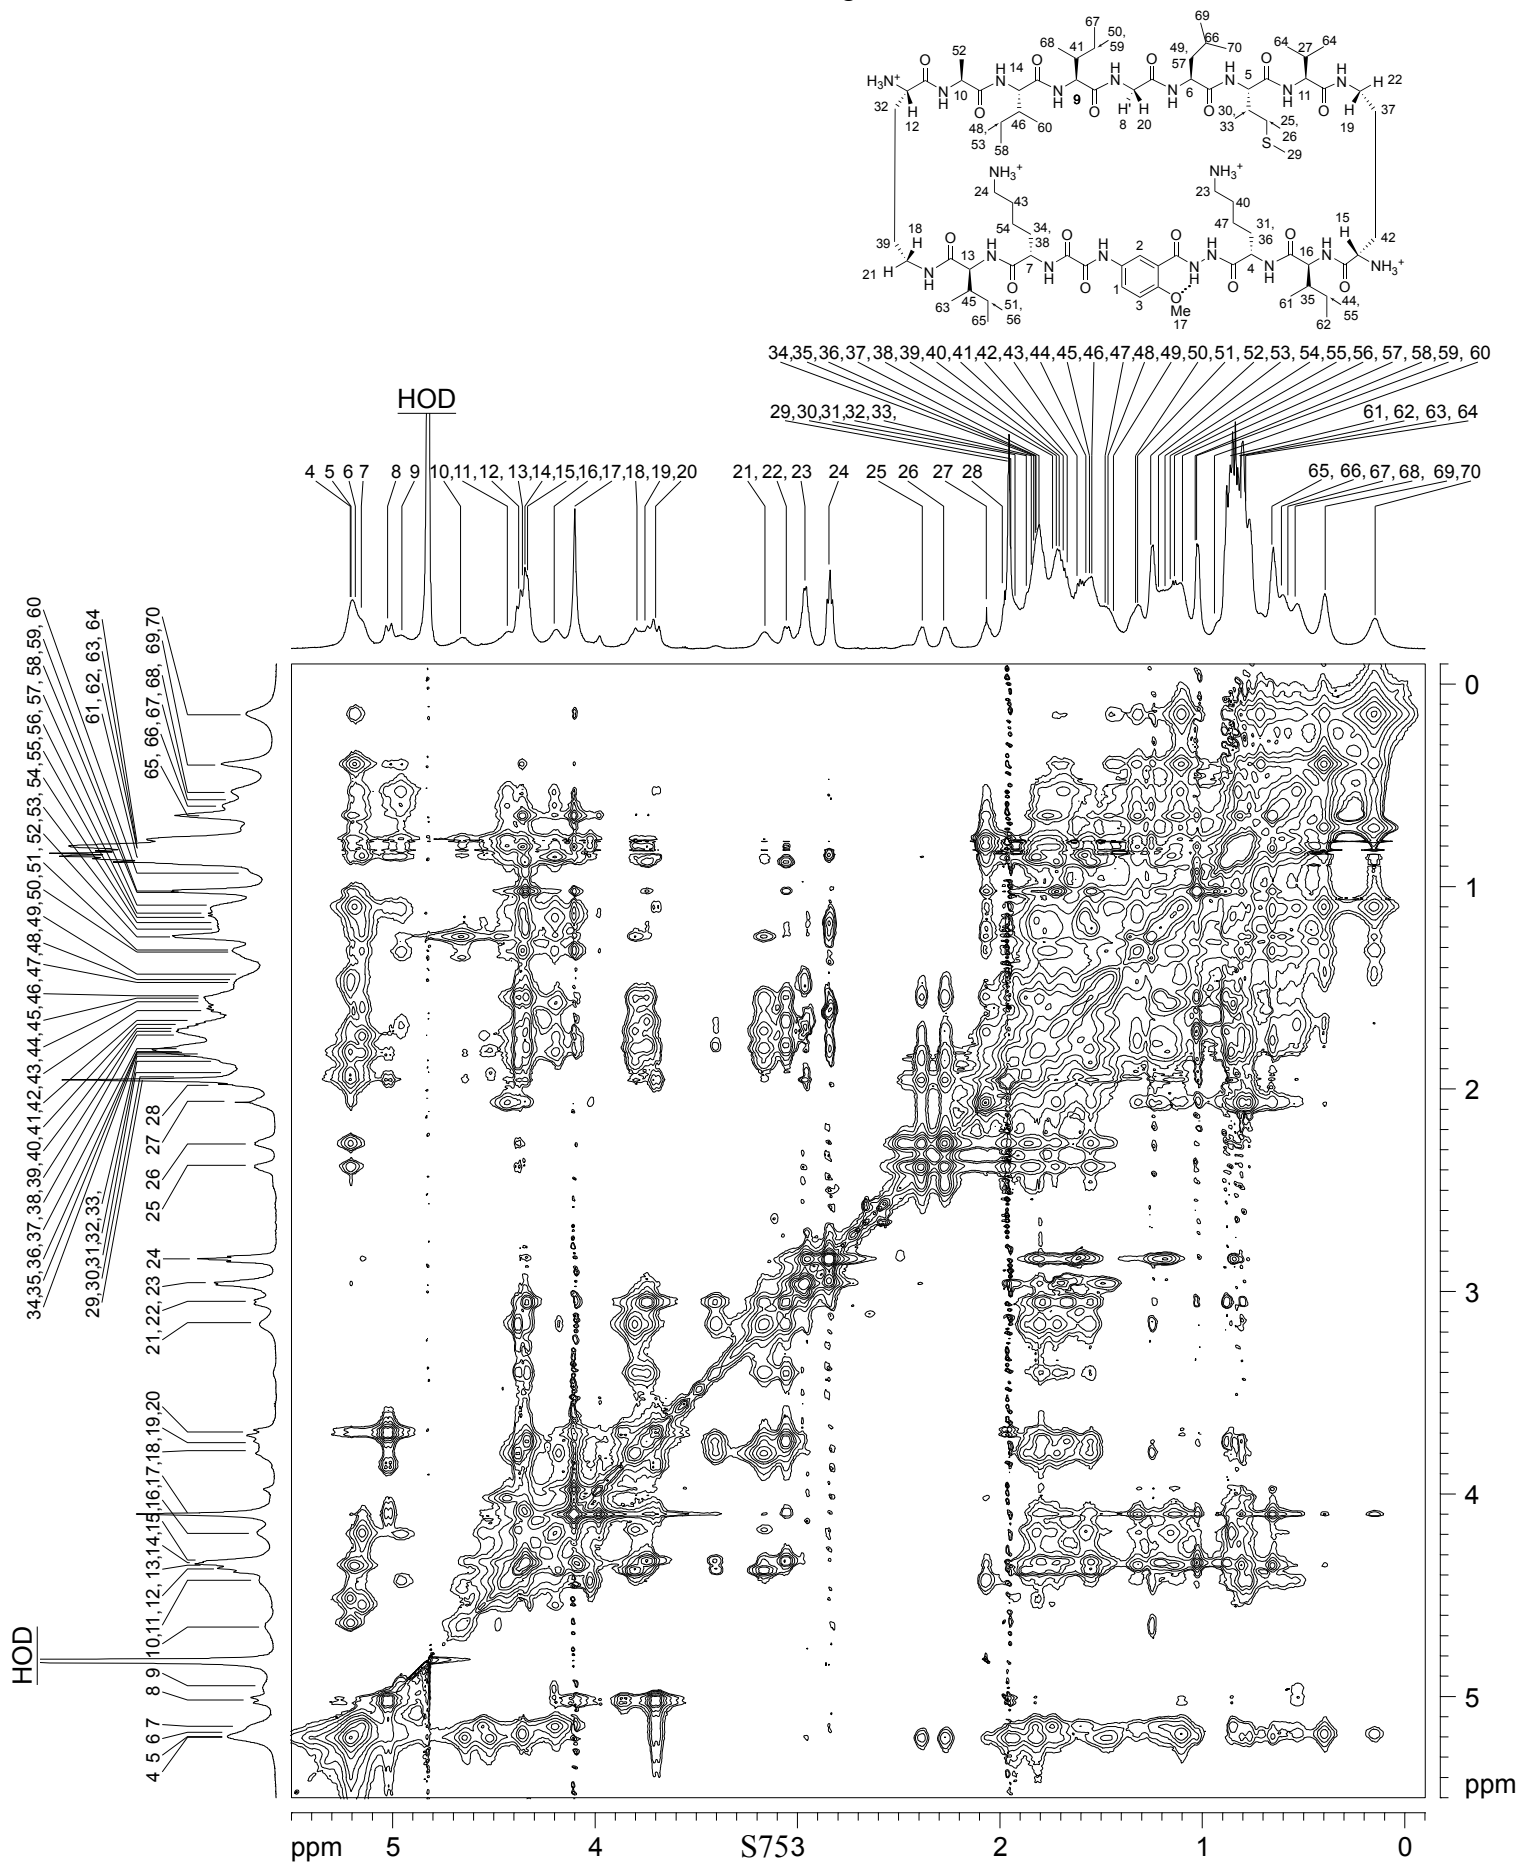

$^1\text{H}$  NMR DOSY of peptide **1b**, 16 mM in  $\text{D}_2\text{O}$  at 500 MHz and 298 K  
tetramer predominates

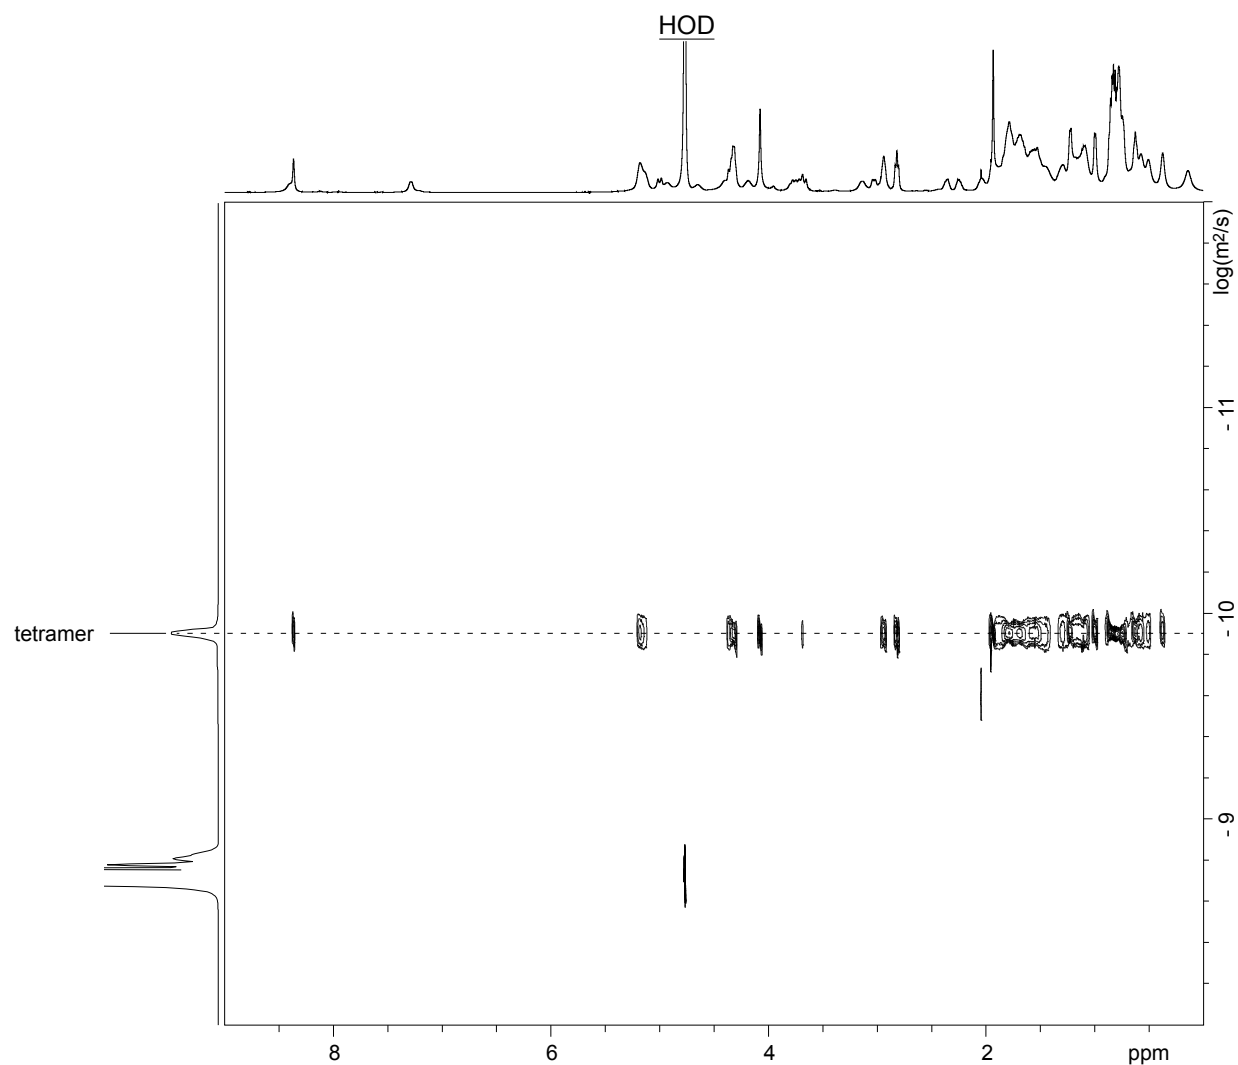

Calculations for peptide **1b** at 16.0 mM

$$D_{\text{HOD}} = 19.0 \times 10^{-10} \text{ m}^2/\text{s} \text{ }^a$$

$$\log(D_{\text{HOD}}) = -8.721$$

$$D_{\text{tetramer}}: \log(D) = -9.924; D = 10^{-9.924} = 11.9 \pm 1.1 \times 10^{-11} \text{ m}^2/\text{s}$$

<sup>a</sup>Longworth, L. G. *J. Phys. Chem.* **1960**, *64*, 1914–1917.

<sup>1</sup>H NMR of Fmoc-[<sup>15</sup>N]Phe-OH in CDCl<sub>3</sub> at 500 MHz and 298 K

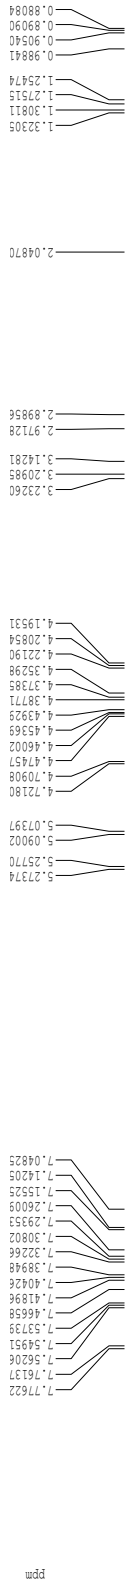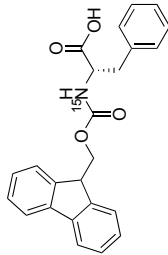

CHCl<sub>3</sub>

Current Data Parameters  
 USER ntruex  
 NM\_iv\_13\_15N\_Phe  
 EXPGNO 15  
 PROCNO 1

F2 - Acquisition Parameters  
 Date\_ 20160525  
 Time\_ 22.29  
 INSTRUM cryo500  
 PROBHD 5 mm CPTCI 1H-  
 PULPROG zg30  
 TD 81728  
 SOLVENT CDCl3  
 NS 2  
 DS 2  
 SWH 8012.826 Hz  
 FIDRES 0.498043 Hz  
 Q 5.099398 sec  
 RG 7.1  
 DW 62.400 usec  
 DE 6.00 usec  
 TE 298.0 K  
 DL 0.1000000 sec  
 ACQRES 0.0100000 sec  
 PCWARR 0.0100000 sec

==== CHANNEL f1 =====  
 NUC1 1H  
 P1 7.50 usec  
 PL1 1.60 dB  
 SFO1 500.225013 MHz

F2 - Processing parameters  
 S1 6534  
 FREQ 500.220033 MHz  
 WDW 0  
 SSB 0  
 LB 1.00 Hz  
 GB 0  
 PC 4.00

ID NMR plot parameters  
 CX 22.80 cm  
 CF 15.00 cm  
 FIP 9.000 ppm  
 F1P 450.108 Hz  
 F2P 0.000 Hz  
 F3P 0.000 Hz  
 PPRCM 0.19474 ppm/cm  
 HZCM 197.4528 Hz/cm

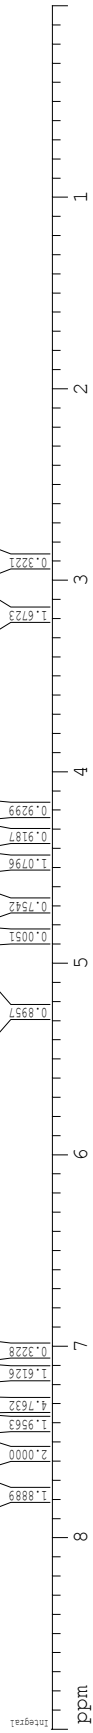

<sup>1</sup>H NMR of Fmoc-[<sup>15</sup>N]Phe-OH in CDCl<sub>3</sub> at 500 MHz and 298 K

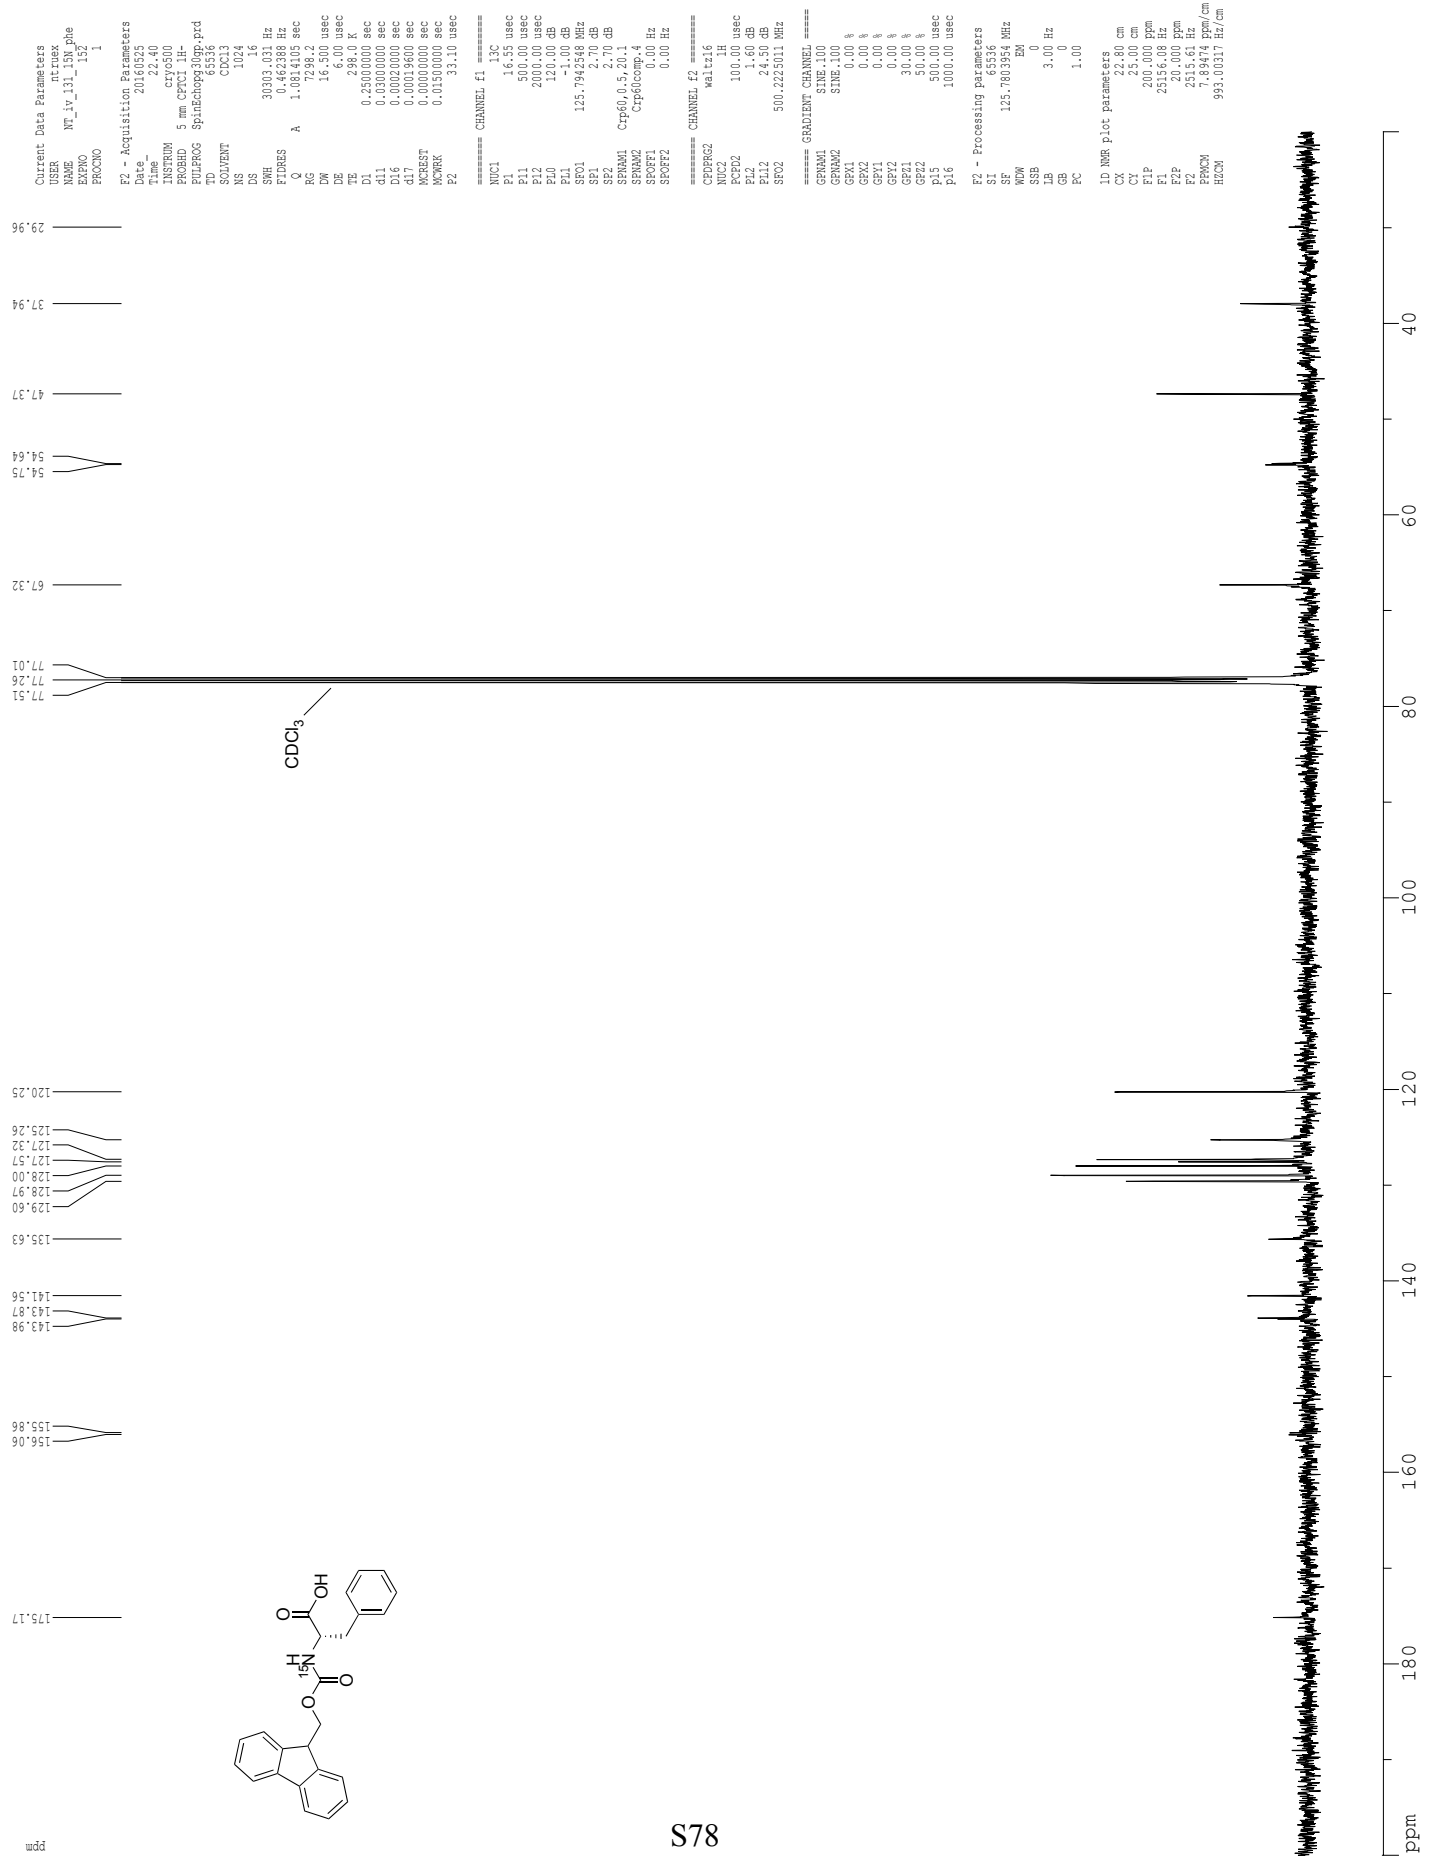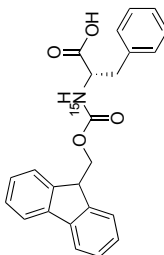

<sup>1</sup>H NMR of Fmoc-[<sup>15</sup>N]Gly-OH in CDCl<sub>3</sub> at 500 MHz and 298 K

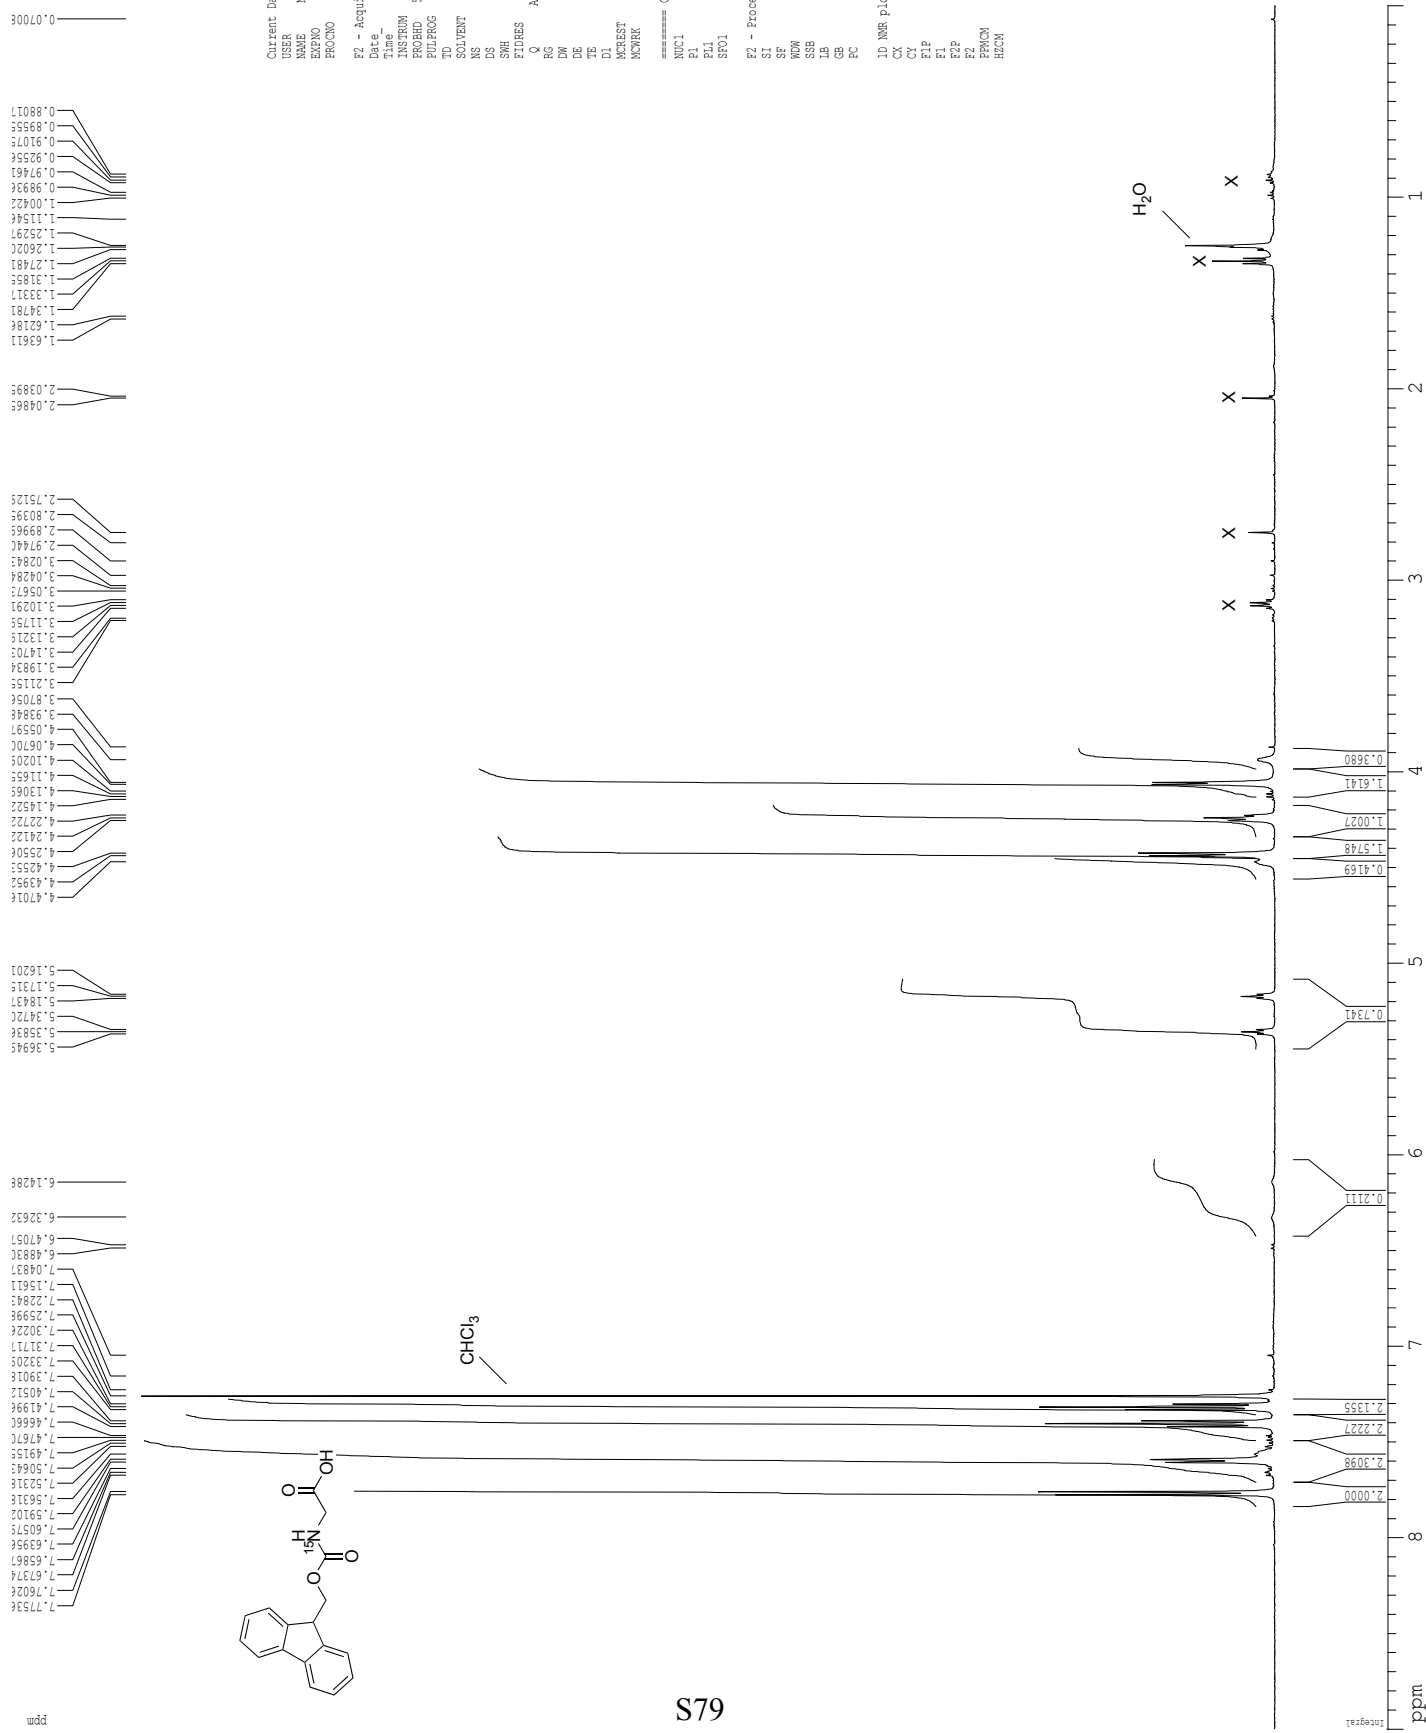

<sup>13</sup>C NMR of Fmoc-[<sup>15</sup>N]Gly-OH in CDCl<sub>3</sub> at 500 MHz and 298 K

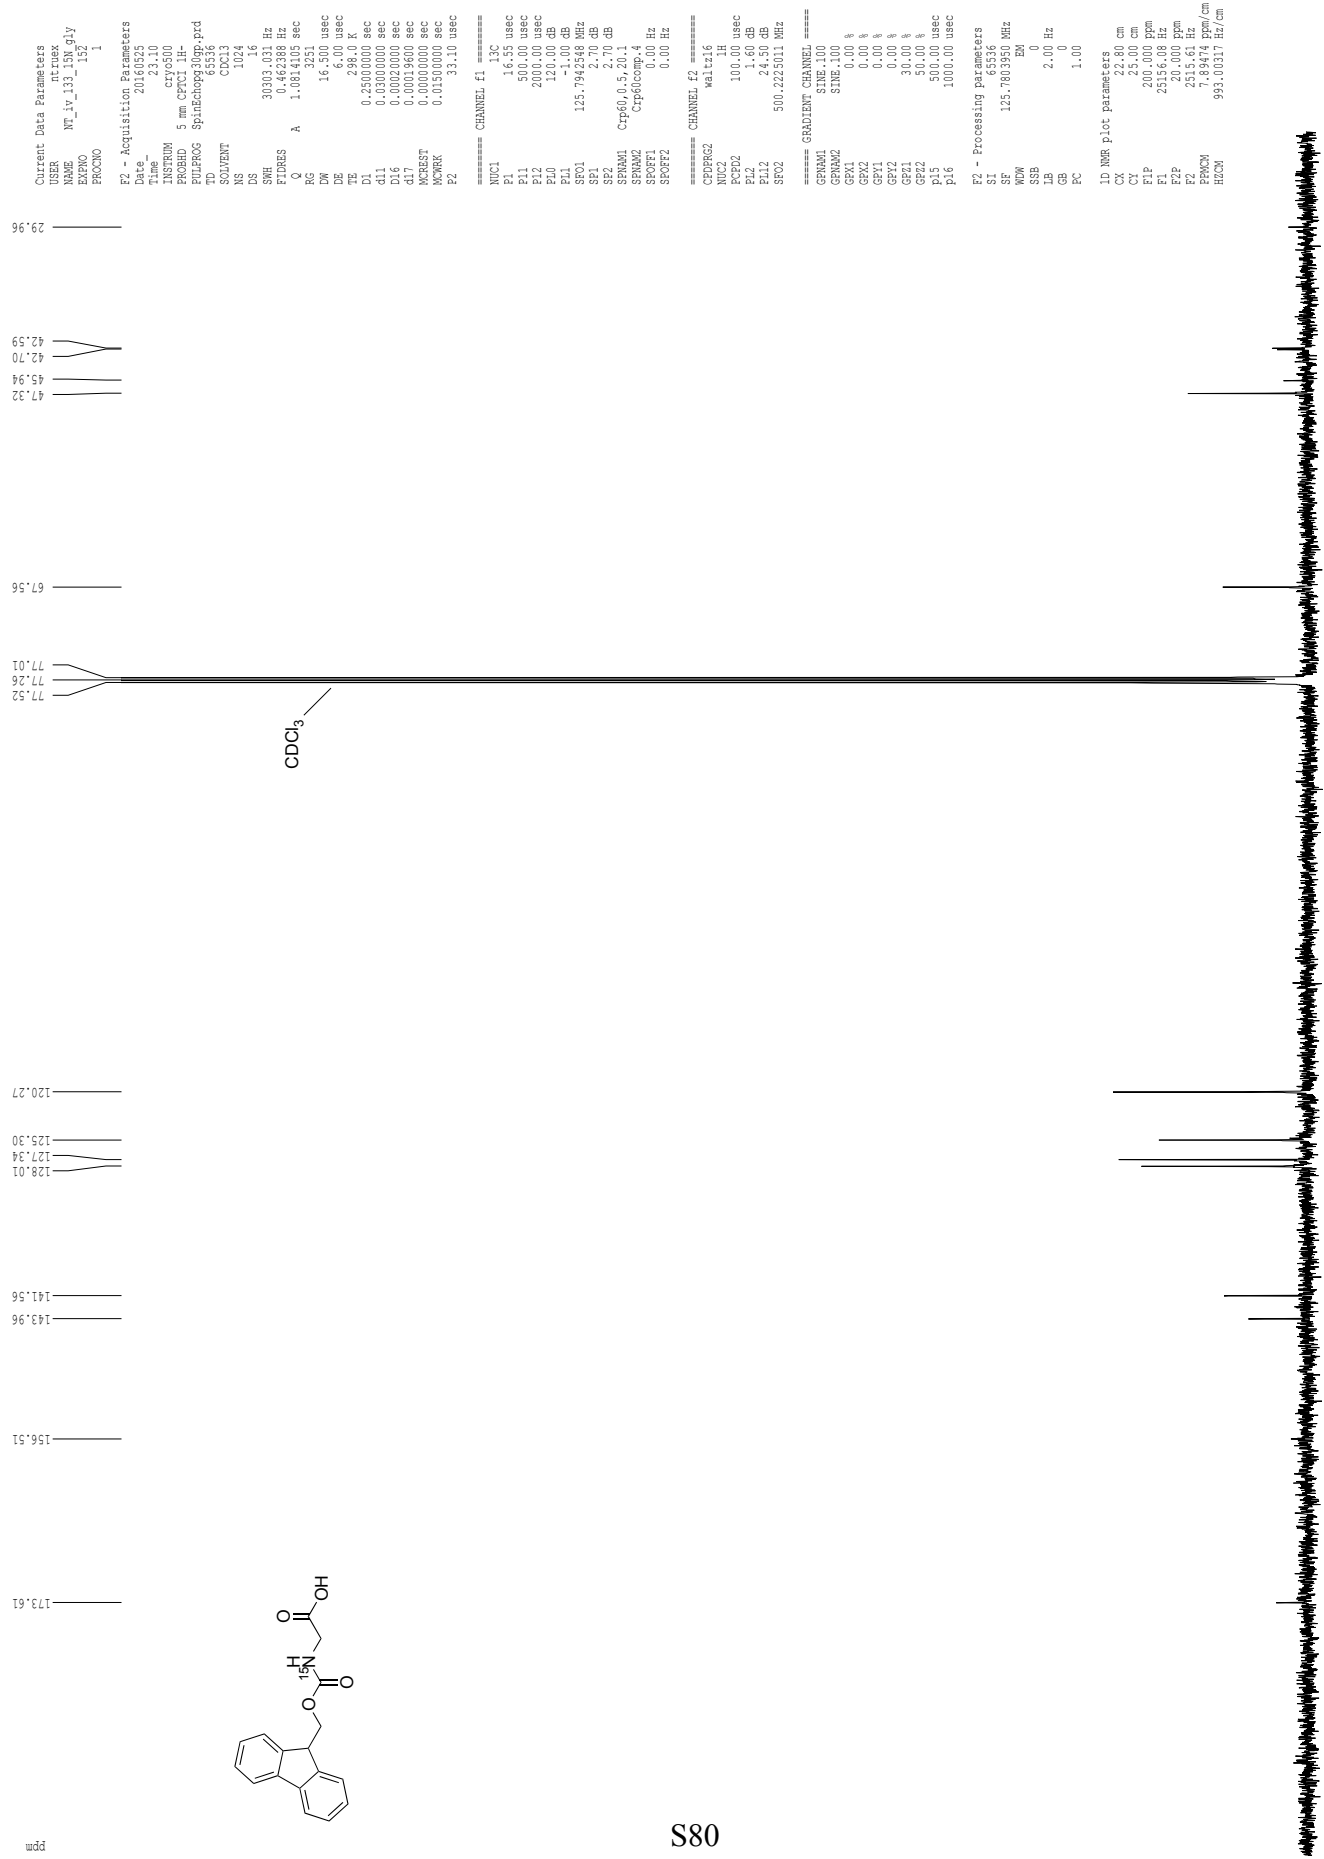

```

Current Data Parameters
=====
USER          NT_iv_131_15N_gly
NAME          EXPTNO 1
PROCNO       1
F2 - Acquisition Parameters
=====
Date_         20160523
Time         23.10
INSTRUM      spect
PROBHD       5 mm CPY 1H
PULPROG      zgpg30
TD           65536
SOLVENT      CDCl3
NS           1024
DS           16
SWH          30303.031 Hz
FIDRES      0.462386 Hz
AQ          1.066477 sec
RG           351
DM           16.500 usec
DE           6.00 usec
TE           298.0 K
D1           0.25000000 sec
d11          0.03000000 sec
D16          0.00020000 sec
d17          0.00019600 sec
DELTA        0.00000000 sec
PCYCL1       0.00000000 sec
PCYCL2       0.00000000 sec
PCYCL3       0.00000000 sec
=====
===== CHANNEL f1 =====
NUC1         13C
P1           16.55 usec
PL1          500.00 usec
P2           200.00 usec
PL2          1.60 dB
P3           1.00 dB
PL3          1.00 dB
SFO1         125.7942548 MHz
SF1          2.70 dB
SF2          2.70 dB
SFO2         Ctp60_0.5.20.1
SFO3         Ctp60comp.4
SFO4         0.00 Hz
SFO5         0.00 Hz
SFO6         0.00 Hz
===== CHANNEL f2 =====
CPDPRG2     wait16
NUC2         1H
P2           100.00 usec
PL2          1.60 dB
SFO2         500.1364200 MHz
===== GRADIENT CHANNEL =====
GPRM1       SINE 100
GPRM2       SINE 100
GPP1        0.00 %
GPP2        0.00 %
GPP3        0.00 %
GPP4        0.00 %
GPP5        30.00 %
GPP6        30.00 %
GPP7        50.00 %
GPP8        100.00 usec
===== F2 - Processing parameters =====
SI           65536
SF           125.7942548 MHz
WDW          EM
SSB          0
GB           0
PC           1.00
===== 1D NMR plot parameters =====
CX           22.80 cm
CY           25.00 cm
FLP         200.000 ppm
F1           25156.08 Hz
F2           2515.41 ppm
F3           2515.41 ppm
F4           7.89474 ppm/cm
F5           933.00317 Hz/cm
  
```



$^1\text{H}, ^{15}\text{N}$  HSQC of peptide [ $^{15}\text{N}$ ]**1a** in 9:1  $\text{H}_2\text{O}/\text{D}_2\text{O}$  at 600 MHz and 293 K  
8.0 mM total concentration

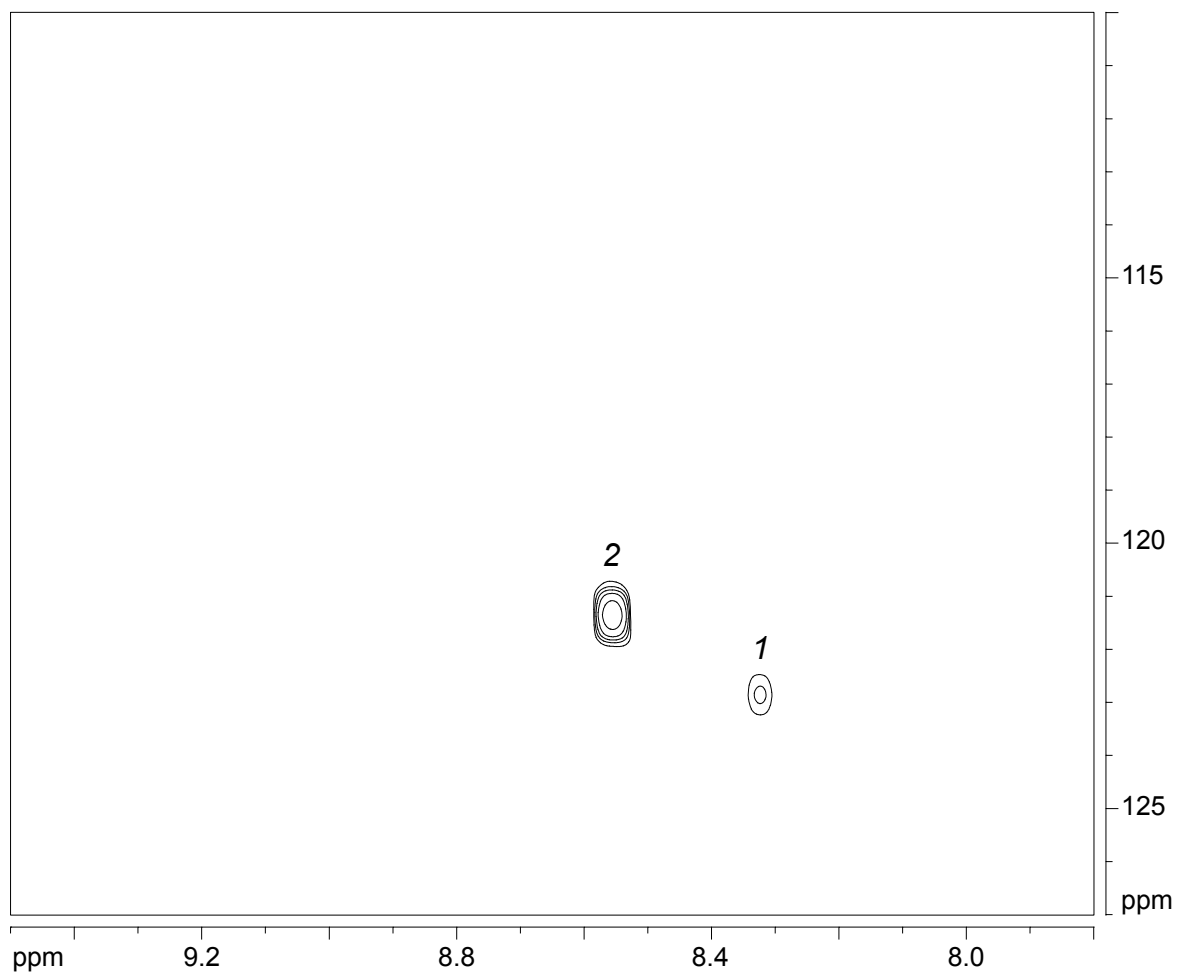

$^1\text{H}, ^{15}\text{N}$  HSQC of peptide [ $^{15}\text{N}$ ]**1b** in 9:1  $\text{H}_2\text{O}/\text{D}_2\text{O}$  at 600 MHz and 293 K  
8.0 mM total concentration

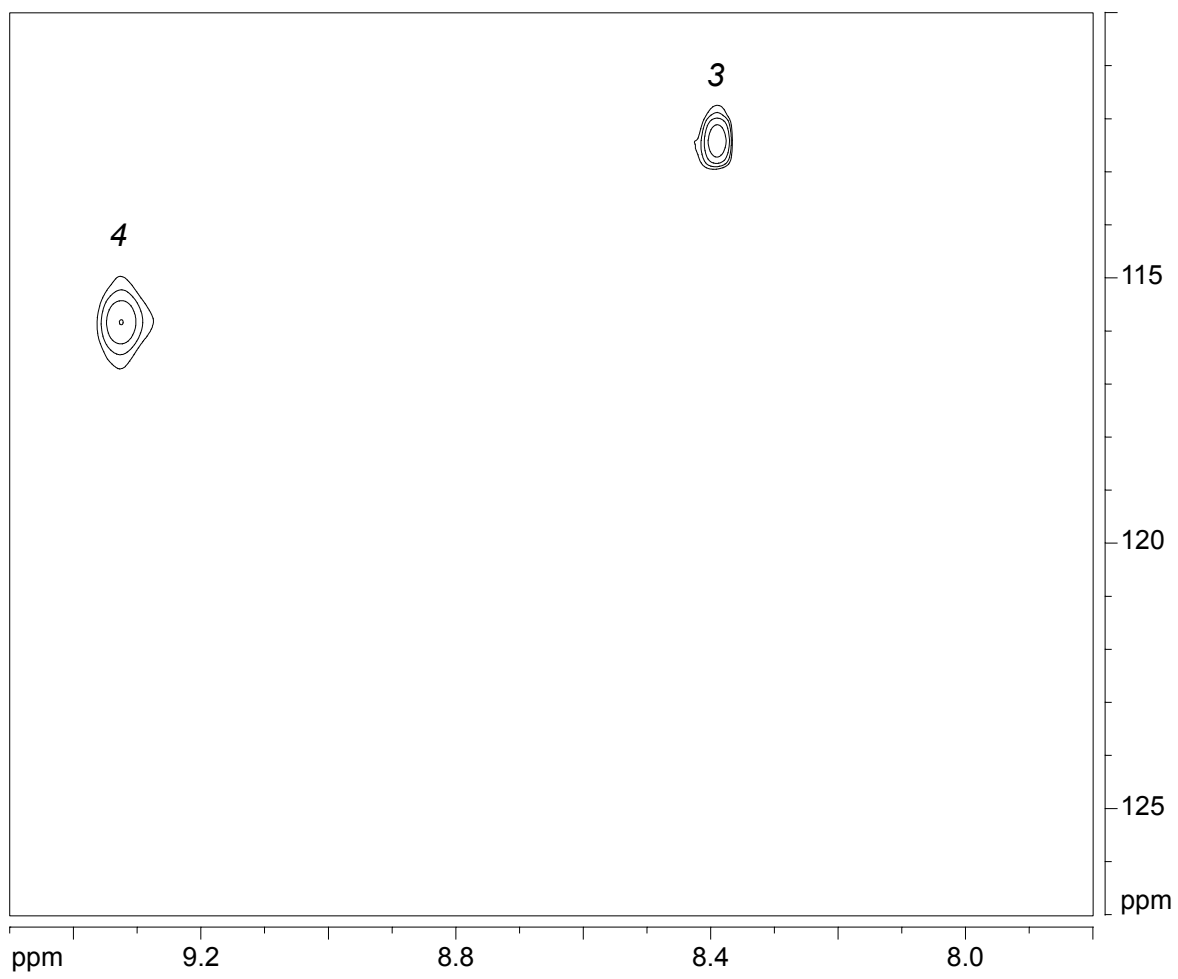

Supplement: ja6b06000_si_001.pdf [file ja6b06000_si_001.pdf]
